# Supplementary material for: Screening of Candida albicans GRACE library revealed a unique pattern of biofilm formation under repression of the essential gene ILS1
Source: Sci Rep. 2019 Jun 24;9:9187. doi: 10.1038/s41598-019-45624-y (PMC6591175; doi:10.1038/s41598-019-45624-y)
Supplement: Supplementary file 1 — Dataset 1 [file 41598_2019_45624_MOESM1_ESM.xlsx]

## Sheet: First screening
Gene	Merck Strain ID	Common	Plate	Position	RPMI-MOPS	RPMI-MOPS+DOX	RPMI-MOPS+DOX minus RPMI+MOPS
orf19.5507	731	ENP1	Plate 01	A01	0.450275	0.4359	-0.014375
orf19.4194	605		Plate 01	A02	0.4575	0.4227	-0.0348
orf19.665	513	NEP1	Plate 01	A03	0.46625	0.5155	0.04925
orf19.2884	160	CDC68	Plate 01	A04	0.445825	0.0494	-0.396425
orf19.2314	92		Plate 01	A05	0.50355	0.1233	-0.38025
orf19.275	133		Plate 01	A06	0.487	0.271375	-0.215625
orf19.1199	584	NOP5	Plate 01	A07	0.38945	0.0844	-0.30505
orf19.3243	630	SRP54	Plate 01	A08	0.45465	0.34285	-0.1118
orf19.1221	651	ALG2	Plate 01	A09	0.519625	0.519775	0.000149995
orf19.6217	227	PGA63	Plate 01	A10	0.246475	0.00915	-0.237325
orf19.7041	765		Plate 01	A11	0.440275	0.013825	-0.42645
orf19.6820	772		Plate 01	A12	0.467275	0.035525	-0.43175
orf19.5531	773	CDC37	Plate 01	B01	0.482175	0.522175	0.04
orf19.2002	780		Plate 01	B02	0.3629	0.011575	-0.351325
orf19.2712	787	HCA4	Plate 01	B03	0.43745	0.34775	-0.0897
orf19.7291	790		Plate 01	B04	0.425375	0.37225	-0.053125
orf19.6026	850	ERG2	Plate 01	B05	0.446325	0.46315	0.016825
orf19.767	851	ERG3	Plate 01	B06	0.4195	0.427525	0.008025
orf19.1031	856	HMG1	Plate 01	B07	0.405075	0.02985	-0.375225
orf19.6199	857		Plate 01	B08	0.38805	0.427825	0.039775
orf19.5901	767	PKC1	Plate 01	B09	0.41725	0.415775	-0.00147499
orf19.6716	278	ABD1	Plate 01	B10	0.369225	0.447475	0.07825
orf19.3001	528	TEM1	Plate 01	B11	0.4052	0.366725	-0.038475
orf19.6151	620	ARC15	Plate 01	B12	0.488025	0.21275	-0.275275
orf19.274	659	TFC4	Plate 01	C01	0.4537	0.4571	0.00340001
orf19.5360	353	RPC11	Plate 01	C02	0.380175	0.25	-0.130175
orf19.759	556		Plate 01	C03	0.1564	0.005275	-0.151125
orf19.6862	164		Plate 01	C04	0.38975	0.4324	0.04265
orf19.1815	331		Plate 01	C05	0.345275	0.240475	-0.1048
orf19.5013	337	AGM1	Plate 01	C06	0.381675	0.487375	0.1057
orf19.2937	395	PMM1	Plate 01	C07	0.419875	0.09995	-0.319925
orf19.7234	397		Plate 01	C08	0.381775	0.054725	-0.32705
orf19.5912	406	MAK21	Plate 01	C09	0.387125	0.0646	-0.322525
orf19.4427	409	SKP1	Plate 01	C10	0.3841	0.1877	-0.1964
orf19.7119	412	RAD3	Plate 01	C11	0.3755	0.333175	-0.042325
orf19.1387	454		Plate 01	C12	0.45935	0.40625	-0.0531
orf19.1975	606		Plate 01	D01	0.5125	0.318775	-0.193725
orf19.6860	611		Plate 01	D02	0.341825	0.41015	0.068325
orf19.2835	613		Plate 01	D03	0.35315	0.40595	0.0528
orf19.3593	419	RPT6	Plate 01	D04	0.378775	0.343725	-0.03505
orf19.1295	427	VAS1	Plate 01	D05	0.39445	0.458325	0.063875
orf19.1267.1	645		Plate 01	D06	0.398175	0.427075	0.0289
orf19.4640	625	PWP1	Plate 01	D07	0.305275	0.493225	0.18795
orf19.5691	623	CDC11	Plate 01	D08	0.4254	0.44985	0.02445
orf19.7392	711		Plate 01	D09	0.371875	0.2434	-0.128475
orf19.4903	696		Plate 01	D10	0.37735	0.4828	0.10545
orf19.2559	648	CDC4	Plate 01	D11	0.346875	0.41995	0.073075
orf19.3761	600	CDC54	Plate 01	D12	0.42435	0.231475	-0.192875
orf19.7064	573	GLN4	Plate 01	E01	0.443525	0.28635	-0.157175
orf19.4815	582	YTM1	Plate 01	E02	0.342775	0.2047	-0.138075
orf19.4641	514	NMT1	Plate 01	E03	0.382775	0.50165	0.118875
orf19.3169	254		Plate 01	E04	0.398575	0.484475	0.0859
orf19.3128	361		Plate 01	E05	0.34985	0.496375	0.146525
orf19.3178	291		Plate 01	E06	0.4038	0.421225	0.017425
orf19.7136	429	SPT6	Plate 01	E07	0.406275	0.44775	0.041475
orf19.1164	333	GAR1	Plate 01	E08	0.393025	0.510725	0.1177
orf19.122	655	CDC20	Plate 01	E09	0.36125	0.330825	-0.030425
orf19.1304	442		Plate 01	E10	0.353375	0.425575	0.0722
orf19.4851	485	TFA1	Plate 01	E11	0.386675	0.3214	-0.065275
orf19.107	487	SNT11	Plate 01	E12	0.384425	0.495625	0.1112
orf19.7101	48		Plate 01	F01	0.461875	0.4918	0.029925
orf19.2847	193		Plate 01	F02	0.451475	0.31095	-0.140525
orf19.542.2	60	MIM1	Plate 01	F03	0.369375	0.4118	0.042425
orf19.3366	100	CSH3	Plate 01	F04	0.38865	0.44825	0.0596
orf19.4388	112		Plate 01	F05	0.404675	0.404275	-0.000400014
orf19.6025	330	alg13	Plate 01	F06	0.359325	0.449625	0.0903
orf19.6014	583	RRS1	Plate 01	F07	0.405725	0.037625	-0.3681
orf19.4382	589		Plate 01	F08	0.17415	0.008425	-0.165725
orf19.2504	817	BMS1	Plate 01	F09	0.3615	0.27675	-0.08475
orf19.1591	814	ERG10	Plate 01	F10	0.390725	0.178575	-0.21215
orf19.2365	824	POL2	Plate 01	F11	0.376075	0.397975	0.0219
orf19.7384	829	NOG1	Plate 01	F12	0.488125	0.05015	-0.437975
orf19.3129	838		Plate 01	G01	0.459375	0.1893	-0.270075
orf19.4192	834	CDC14	Plate 01	G02	0.402575	0.037175	-0.3654
orf19.1738	830	UGP1	Plate 01	G03	0.2979	0.335225	0.037325
orf19.2216	837	PDS5	Plate 01	G04	0.4156	0.42285	0.00724999
orf19.7413	122	MMS21	Plate 01	G05	0.389625	0.445	0.055375
orf19.4005	362		Plate 01	G06	0.394975	0.458575	0.0636
orf19.5379	852	ERG4	Plate 01	G07	0.374125	0.3833	0.009175
orf19.4089	94	SGT1	Plate 01	G08	0.41405	0.4326	0.01855
orf19.7255	447	RPC10	Plate 01	G09	0.414775	0.017125	-0.39765
orf19.6345	768	RPG1A	Plate 01	G10	0.28535	0.014975	-0.270375
orf19.4616	769	POL30	Plate 01	G11	0.3984	0.24465	-0.15375
orf19.1672	770		Plate 01	G12	0.2035	0.012075	-0.191425
orf19.4987	782	NUP49	Plate 01	H01	0.46255	0.5548	0.09225
orf19.6099	786	CCT8	Plate 01	H02	0.3562	0.027175	-0.329025
orf19.6422	791	SSY5	Plate 01	H03	0.4635	0.520375	0.056875
orf19.1631	854	ERG6	Plate 01	H04	0.394375	0.1827	-0.211675
orf19.4346	864		Plate 01	H05	0.45225	0.2118	-0.24045
orf19.1915	792	MPP10	Plate 01	H06	0.511675	0.193075	-0.3186
orf19.6171	872		Plate 01	H07	0.4957	0.2052	-0.2905
orf19.2116	873	NAT2	Plate 01	H08	0.4786	0.49265	0.01405
orf19.4435	876		Plate 01	H09	0.455925	0.44435	-0.011575
orf19.4377	877	KRE1	Plate 01	H10	0.43325	0.414075	-0.019175
orf19.7363	879	KRE6	Plate 01	H11	0.440225	0.44085	0.000624999
orf19.5861	880	KRE9	Plate 01	H12	0.51445	0.32055	-0.1939
orf19.1607	881	ALR1	Plate 02	A01	0.528925	0.343475	-0.18545
orf19.5221	809		Plate 02	A02	0.4582	0.487375	0.029175
orf19.5093	800		Plate 02	A03	0.493275	0.417025	-0.07625
orf19.1077	805	ATM1	Plate 02	A04	0.49545	0.468125	-0.027325
orf19.3341	832		Plate 02	A05	0.4817	0.0919	-0.3898
orf19.6818	802		Plate 02	A06	0.46735	0.451875	-0.015475
orf19.418	827	KOG1	Plate 02	A07	0.4799	0.0655	-0.4144
orf19.6356	844		Plate 02	A08	0.43725	0.470825	0.033575
orf19.1192	449	DNA2	Plate 02	A09	0.44165	0.46195	0.0203
orf19.878	445	NBN1	Plate 02	A10	0.44615	0.447825	0.00167499
orf19.4336	482	RPS5	Plate 02	A11	0.421825	0.429975	0.00814999
orf19.7655	821	RPO21	Plate 02	A12	0.5883	0.550375	-0.037925
orf19.6074	771	HBR1	Plate 02	B01	0.42265	0.44995	0.0273
orf19.6925	775	HTB1	Plate 02	B02	0.354375	0.4144	0.060025
orf19.2760	776		Plate 02	B03	0.3527	0.058	-0.2947
orf19.5577	778		Plate 02	B04	0.395625	0.2014	-0.194225
orf19.3955	783	MES1	Plate 02	B05	0.393275	0.147075	-0.2462
orf19.4956	785	RPN1	Plate 02	B06	0.3716	0.165875	-0.205725
orf19.2778	846		Plate 02	B07	0.40245	0.41955	0.0171
orf19.3301	847		Plate 02	B08	0.402325	0.35215	-0.050175
orf19.6559	848		Plate 02	B09	0.395	0.389575	-0.005425
orf19.5178	853	ERG5	Plate 02	B10	0.458275	0.500925	0.04265
orf19.1649	862	RNA1	Plate 02	B11	0.381275	0.1416	-0.239675
orf19.3996	866		Plate 02	B12	0.443425	0.4603	0.016875
orf19.5143	788	TIM54	Plate 02	C01	0.437725	0.46965	0.031925
orf19.4015	870	CAG1	Plate 02	C02	0.41515	0.477825	0.062675
orf19.6294	784	MYO1	Plate 02	C03	0.352925	0.367825	0.0149
orf19.1598	855	ERG24	Plate 02	C04	0.40815	0.4658	0.05765
orf19.2873	806	TOP2	Plate 02	C05	0.392275	0.429575	0.0373
orf19.4451	807	RIA1	Plate 02	C06	0.3805	0.4604	0.0799
orf19.1110	812		Plate 02	C07	0.3912	0.444225	0.053025
orf19.3704	808		Plate 02	C08	0.387775	0.258825	-0.12895
orf19.3796	804	DCR1	Plate 02	C09	0.38955	0.465675	0.076125
orf19.5991	826		Plate 02	C10	0.383075	0.222325	-0.16075
orf19.7529	779	EPL1	Plate 02	C11	0.395625	0.117725	-0.2779
orf19.3177	1233		Plate 02	C12	0.483275	0.393825	-0.08945
orf19.2330	1224		Plate 02	D01	0.46385	0.3574	-0.10645
orf19.5608	1232		Plate 02	D02	0.401075	0.3861	-0.014975
orf19.5650	1225	PRO3	Plate 02	D03	0.403325	0.405525	0.0022
orf19.586	753	ERV46	Plate 02	D04	0.389775	0.4014	0.011625
orf19.5825	631	NCB2	Plate 02	D05	0.449225	0.35895	-0.090275
orf19.7081	284	SPL1	Plate 02	D06	0.398575	0.2951	-0.103475
orf19.4258	127		Plate 02	D07	0.38265	0.405375	0.022725
orf19.6541	595	RPL5	Plate 02	D08	0.376675	0.404625	0.02795
orf19.5465	326		Plate 02	D09	0.334675	0.368675	0.034
orf19.3087	797	UBI3	Plate 02	D10	0.2007	0.194975	-0.005725
orf19.5693	744		Plate 02	D11	0.308	0.01595	-0.29205
orf19.2013	749	KAR2	Plate 02	D12	0.4526	0.0177	-0.4349
orf19.2029	735	RFC5	Plate 02	E01	0.4605	0.482075	0.021575
orf19.2084	763	CDH1	Plate 02	E02	0.408225	0.4161	0.007875
orf19.1229	833		Plate 02	E03	0.409025	0.12065	-0.288375
orf19.5188	754	CHS1	Plate 02	E04	0.382125	0.0456	-0.336525
orf19.2407	496	DPS1-1	Plate 02	E05	0.38725	0.048075	-0.339175
orf19.5597	839	POL5	Plate 02	E06	0.3725	0.403975	0.031475
orf19.5148	825	CYR1	Plate 02	E07	0.38005	0.420625	0.040575
orf19.3859	757		Plate 02	E08	0.39075	0.4396	0.04885
orf19.2215	750	GLE1	Plate 02	E09	0.3877	0.2519	-0.1358
orf19.6568	801	SMC6	Plate 02	E10	0.406825	0.37715	-0.029675
orf19.6828	357		Plate 02	E11	0.37915	0.334325	-0.044825
orf19.2233	607	PRE2	Plate 02	E12	0.427025	0.0574	-0.369625
orf19.6213	748	SUI2	Plate 02	F01	0.44275	0.1749	-0.26785
orf19.5779	762	RNR1	Plate 02	F02	0.367775	0.04135	-0.326425
orf19.6640	756	TPS1	Plate 02	F03	0.386075	0.41205	0.025975
orf19.709	434	PUP2	Plate 02	F04	0.31875	0.039825	-0.278925
orf19.6432	526		Plate 02	F05	0.402825	0.47915	0.076325
orf19.5226	810	WRS1	Plate 02	F06	0.39785	0.42445	0.0266
orf19.819	793		Plate 02	F07	0.38235	0.446775	0.064425
orf19.2629	831		Plate 02	F08	0.399075	0.0784	-0.320675
orf19.4697	823	MDN1	Plate 02	F09	0.388	0.4118	0.0238
orf19.3696	741	TOM22	Plate 02	F10	0.3801	0.371775	-0.008325
orf19.3130	798		Plate 02	F11	0.437875	0.310325	-0.12755
orf19.3098	647		Plate 02	F12	0.4915	0.0246	-0.4669
orf19.6438	543		Plate 02	G01	0.47835	0.39935	-0.079
orf19.6105	558	MVD	Plate 02	G02	0.324275	0.0592	-0.265075
orf19.3168	581	RPN8	Plate 02	G03	0.38485	0.097575	-0.287275
orf19.2761	224		Plate 02	G04	0.4008	0.3825	-0.0183
orf19.5487	686	CDC46	Plate 02	G05	0.386475	0.078275	-0.3082
orf19.4635	699	NIP1	Plate 02	G06	0.31885	0.0752	-0.24365
orf19.6936	815	RAD53	Plate 02	G07	0.3492	0.349375	0.000175007
orf19.2369	319		Plate 02	G08	0.40475	0.414825	0.010075
orf19.2404	703		Plate 02	G09	0.402025	0.48045	0.078425
orf19.941	742	SEC14	Plate 02	G10	0.3936	0.375775	-0.017825
orf19.1902	819	NOC4	Plate 02	G11	0.371	0.230525	-0.140475
orf19.4746	820	JIP5	Plate 02	G12	0.43085	0.496575	0.065725
orf19.7035	747	RFC2	Plate 02	H01	0.485725	0.4889	0.00317499
orf19.2313	32		Plate 02	H02	0.49055	0.481175	-0.009375
orf19.3447	25		Plate 02	H03	0.5263	0.457525	-0.068775
orf19.7264	396		Plate 02	H04	0.365025	0.0293	-0.335725
orf19.4491	472	ERG20	Plate 02	H05	0.533975	0.142575	-0.3914
orf19.5765	175	NUP82	Plate 02	H06	0.44845	0.3009	-0.14755
orf19.4230	398		Plate 02	H07	0.44945	0.489225	0.039775
orf19.3055	845	MED17	Plate 02	H08	0.357625	0.5161	0.158475
orf19.5163	169	SFI1	Plate 02	H09	0.448525	0.486675	0.03815
orf19.1839	588	RPA190	Plate 02	H10	0.439325	0.03325	-0.406075
orf19.5746	587	ALA1	Plate 02	H11	0.4223	0.01745	-0.40485
orf19.6942	67	ORC3	Plate 02	H12	0.4486	0.384025	-0.064575
orf19.3651	287	PGK1	Plate 03	A01	0.384625	0.3053	-0.079325
orf19.2260	221		Plate 03	A02	0.428075	0.437175	0.00909999
orf19.3561	751	CDC7	Plate 03	A03	0.44985	0.462125	0.012275
orf19.6046	836	APC1	Plate 03	A04	0.4574	0.4477	-0.0097
orf19.3058	841		Plate 03	A05	0.392025	0.529275	0.13725
orf19.4585	740	TFG1	Plate 03	A06	0.37265	0.4934	0.12075
orf19.6075	759		Plate 03	A07	0.420425	0.402125	-0.0183
orf19.7062	818	RPA135	Plate 03	A08	0.366625	0.02455	-0.342075
orf19.3265	760	TRM1	Plate 03	A09	0.472425	0.4778	0.00537498
orf19.3451	822	TRA1	Plate 03	A10	0.4869	0.500825	0.013925
orf19.6926	835	CSC25	Plate 03	A11	0.4017	0.4518	0.0501
orf19.5516	816		Plate 03	A12	0.406375	0.350975	-0.0554
orf19.1232	189	VRG4	Plate 03	B01	0.369375	0.39005	0.020675
orf19.5947	774	SEC7	Plate 03	B02	0.4061	0.256875	-0.149225
orf19.7215	789		Plate 03	B03	0.383325	0.2882	-0.095125
orf19.7232	863	IRR1	Plate 03	B04	0.3881	0.302875	-0.085225
orf19.1491	871		Plate 03	B05	0.392775	0.2414	-0.151375
orf19.3062	28		Plate 03	B06	0.387475	0.454325	0.06685
orf19.7227	149		Plate 03	B07	0.34065	0.36405	0.0234
orf19.1633	199	UTP4	Plate 03	B08	0.395525	0.0748	-0.320725
orf19.7645	301		Plate 03	B09	0.3787	0.389625	0.010925
orf19.2641	394	ARP1	Plate 03	B10	0.4473	0.41235	-0.03495
orf19.5895	4022		Plate 03	B11	0.4068	0.3805	-0.0263
orf19.6707	4066		Plate 03	B12	0.42555	0.432125	0.006575
orf19.6168	4268		Plate 03	C01	0.400825	0.3881	-0.012725
orf19.7184	4271		Plate 03	C02	0.367425	0.370425	0.003
orf19.4941	4216	TYE7	Plate 03	C03	0.385175	0.39025	0.005075
orf19.4414	4251		Plate 03	C04	0.336525	0.353775	0.01725
orf19.7567	4262		Plate 03	C05	0.393025	0.524	0.130975
orf19.5067	4263		Plate 03	C06	0.418525	0.3843	-0.034225
orf19.2671	4074		Plate 03	C07	0.398275	0.3956	-0.002675
orf19.7073	4127		Plate 03	C08	0.39965	0.4308	0.03115
orf19.2653	4147		Plate 03	C09	0.351275	0.37855	0.027275
orf19.3466	4175		Plate 03	C10	0.3783	0.41	0.0317
orf19.1125	4207		Plate 03	C11	0.326475	0.38955	0.063075
orf19.3434	4132	TRY5	Plate 03	C12	0.44395	0.422375	-0.021575
orf19.645	4105	HGT9	Plate 03	D01	0.39835	0.431625	0.033275
orf19.703	4190		Plate 03	D02	0.3969	0.39615	-0.000750005
orf19.3560	4203		Plate 03	D03	0.361525	0.3188	-0.042725
orf19.4686	3813		Plate 03	D04	0.360575	0.3518	-0.00877501
orf19.3536	3820		Plate 03	D05	0.365075	0.371425	0.00635
orf19.2659	3823	UCF1	Plate 03	D06	0.38995	0.40165	0.0117
orf19.6660	3843		Plate 03	D07	0.361525	0.36535	0.003825
orf19.5629	3876	QCR7	Plate 03	D08	0.35135	0.25715	-0.0942
orf19.7150	4021	NRG1	Plate 03	D09	0.00295	0.007525	0.004575
orf19.4730	4089		Plate 03	D10	0.43085	0.3669	-0.06395
orf19.4528	4091		Plate 03	D11	0.37185	0.3755	0.00364999
orf19.6133	3748	PIF1	Plate 03	D12	0.431425	0.4543	0.022875
orf19.1479	3785		Plate 03	E01	0.446125	0.406275	-0.03985
orf19.4629	3811		Plate 03	E02	0.370275	0.3957	0.025425
orf19.6200	3851		Plate 03	E03	0.35805	0.366875	0.008825
orf19.5812	3879		Plate 03	E04	0.359775	0.377025	0.01725
orf19.4023	3895	MRP2	Plate 03	E05	0.395	0.3904	-0.0046
orf19.585	3896		Plate 03	E06	0.39485	0.285175	-0.109675
orf19.7017	3909	YOX1	Plate 03	E07	0.4183	0.397375	-0.020925
orf19.3406	3916		Plate 03	E08	0.369775	0.405275	0.0355
orf19.6055	3923		Plate 03	E09	0.3437	0.3814	0.0377
orf19.811	3928		Plate 03	E10	0.37245	0.390475	0.018025
orf19.297	3970	DTD2	Plate 03	E11	0.3826	0.38385	0.00125
orf19.4294	3983		Plate 03	E12	0.504725	0.476525	-0.0282
orf19.6515	1203	HSP90	Plate 03	F01	0.39395	0.07655	-0.3174
orf19.5934	1205		Plate 03	F02	0.394675	0.3664	-0.028275
orf19.2706	1212	CRH11	Plate 03	F03	0.307375	0.413775	0.1064
orf19.2075	1222	DFG5	Plate 03	F04	0.379	0.3885	0.0095
orf19.3823	1261	ZDS1	Plate 03	F05	0.39105	0.455775	0.064725
orf19.4366	4128		Plate 03	F06	0.3615	0.374325	0.012825
orf19.7484	910	ADE1	Plate 03	F07	0.384475	0.30205	-0.082425
orf19.6364	1208	VSP21	Plate 03	F08	0.396975	0.4049	0.007925
orf19.4937	887	CHS3	Plate 03	F09	0.3901	0.3398	-0.0503
orf19.4255	991	ECM331	Plate 03	F10	0.38475	0.38595	0.00120001
orf19.1289	940	SCT1	Plate 03	F11	0.39895	0.401075	0.00212501
orf19.7523	2273	MKC1	Plate 03	F12	0.385225	0.405025	0.0198
orf19.5505	1048	HIS7	Plate 03	G01	0.3829	0.4345	0.0516
orf19.158	1015		Plate 03	G02	0.39155	0.3823	-0.00925001
orf19.2655	2718	BUB3	Plate 03	G03	0.3935	0.419275	0.025775
orf19.2678	3026	BUB1	Plate 03	G04	0.411925	0.451675	0.03975
orf19.2283	1380	DQD1	Plate 03	G05	0.395625	0.37125	-0.024375
orf19.1119	1549	MTR10	Plate 03	G06	0.431	0.373225	-0.057775
orf19.3548	950		Plate 03	G07	0.302475	0.403925	0.10145
orf19.3952	1556		Plate 03	G08	0.3727	0.32945	-0.04325
orf19.847	2386	YIM1	Plate 03	G09	0.380875	0.49175	0.110875
orf19.3173	2330		Plate 03	G10	0.4088	0.387625	-0.021175
orf19.642	2380		Plate 03	G11	0.380275	0.381075	0.000799999
orf19.4798	2366		Plate 03	G12	0.437125	0.407825	-0.0293
orf19.5634	2422	FRP1	Plate 03	H01	0.428475	0.461425	0.03295
orf19.2426	1950		Plate 03	H02	0.4631	0.420975	-0.042125
orf19.6832	2277		Plate 03	H03	0.438925	0.639875	0.20095
orf19.2876	2420	CBF1	Plate 03	H04	0.4426	0.4595	0.0169
orf19.3442	2517		Plate 03	H05	0.4628	0.456175	-0.00662501
orf19.6685	2544	ISY1	Plate 03	H06	0.4269	0.461675	0.034775
orf19.4014	2590		Plate 03	H07	0.46065	0.4876	0.02695
orf19.3612	2853	PST2	Plate 03	H08	0.414325	0.458425	0.0441
orf19.1310	2845		Plate 03	H09	0.420075	0.4772	0.057125
orf19.412	2760	SSH1	Plate 03	H10	0.418825	0.442925	0.0241
orf19.4309	2943	GRP2	Plate 03	H11	0.407275	0.432925	0.02565
orf19.1264	3041	CFL2	Plate 03	H12	0.435275	0.422675	-0.0126
orf19.3505	2924		Plate 04	A01	0.398925	0.413125	0.0142
orf19.4347	2900		Plate 04	A02	0.494675	0.4922	-0.00247499
orf19.1763	2908	IFR1	Plate 04	A03	0.432625	0.486375	0.05375
orf19.2753	2872	ZCF15	Plate 04	A04	0.43945	0.4766	0.03715
orf19.99	2798	HAL21	Plate 04	A05	0.36275	0.45755	0.0948
orf19.4939	2484		Plate 04	A06	0.364225	0.450675	0.08645
orf19.2006	2508		Plate 04	A07	0.367875	0.468925	0.10105
orf19.169	2829	CHO2	Plate 04	A08	0.3766	0.462225	0.085625
orf19.246	2667		Plate 04	A09	0.398575	0.461625	0.06305
orf19.5826	3076		Plate 04	A10	0.38525	0.544525	0.159275
orf19.5087	3103	BUD6	Plate 04	A11	0.425925	0.4831	0.057175
orf19.1995	3117	MNN24	Plate 04	A12	0.469775	0.498575	0.0288
orf19.6094	3092	VPS53	Plate 04	B01	0.397075	0.67025	0.273175
orf19.1422	3121	FZO1	Plate 04	B02	0.33685	0.430625	0.093775
orf19.4231	3144	PTH2	Plate 04	B03	0.374225	0.4392	0.064975
orf19.5915	3370	DUR35	Plate 04	B04	0.311375	0.396575	0.0852
orf19.2958	4185		Plate 04	B05	0.330675	0.403375	0.0727
orf19.5655	4178		Plate 04	B06	0.3206	0.41115	0.09055
orf19.405	1160	VCX1	Plate 04	B07	0.3337	0.41095	0.07725
orf19.2690	1194		Plate 04	B08	0.305325	0.3066	0.001275
orf19.4208	1200	RAD52	Plate 04	B09	0.3065	0.41945	0.11295
orf19.5639	1070	HIS4	Plate 04	B10	0.433	0.404875	-0.028125
orf19.3273	1104		Plate 04	B11	0.3537	0.39715	0.04345
orf19.3071	1169	MIH1	Plate 04	B12	0.453125	0.481525	0.0284
orf19.3213	4333		Plate 04	C01	0.357425	0.480525	0.1231
orf19.7161	1554	SUI3	Plate 04	C02	0.268975	0.1779	-0.091075
orf19.3803	1635	MNN22	Plate 04	C03	0.3404	0.4115	0.0711
orf19.1910	4070		Plate 04	C04	0.359275	0.4226	0.063325
orf19.7444	4202		Plate 04	C05	0.3611	0.44765	0.08655
orf19.260	1361	SLD1	Plate 04	C06	0.397975	0.48245	0.084475
orf19.2842	1370	GZF3	Plate 04	C07	0.291325	0.3922	0.100875
orf19.551	1373		Plate 04	C08	0.373325	0.396325	0.023
orf19.5499	1417		Plate 04	C09	0.33865	0.415225	0.076575
orf19.5595	1008	SHE3	Plate 04	C10	0.324025	0.418375	0.09435
orf19.667	1288		Plate 04	C11	0.260625	0.364375	0.10375
orf19.6952	4176		Plate 04	C12	0.421075	0.448225	0.02715
orf19.7105	4354	FAR1	Plate 04	D01	0.44975	0.447225	-0.00252501
orf19.1156	5654	FUS1	Plate 04	D02	0.256975	0.408	0.151025
orf19.4525	4334		Plate 04	D03	0.347075	0.46005	0.112975
orf19.4496	1026		Plate 04	D04	0.314575	0.4652	0.150625
orf19.3581	1027		Plate 04	D05	0.341375	0.43115	0.089775
orf19.789	1036	PYC2	Plate 04	D06	0.401275	0.42035	0.019075
orf19.972	1039		Plate 04	D07	0.30265	0.413475	0.110825
orf19.7459	1043		Plate 04	D08	0.314175	0.28205	-0.032125
orf19.1587	1045	HGT20	Plate 04	D09	0.356475	0.4302	0.073725
orf19.7069	1051		Plate 04	D10	0.316475	0.394825	0.07835
orf19.3608	1114		Plate 04	D11	0.367275	0.402275	0.035
orf19.5735	1115	CDC50	Plate 04	D12	0.24425	0.283975	0.039725
orf19.7678	1121	ATP16	Plate 04	E01	0.35615	0.3281	-0.02805
orf19.831	1122		Plate 04	E02	0.3156	0.162725	-0.152875
orf19.1069	1126	RPN4	Plate 04	E03	0.327725	0.42335	0.095625
orf19.1756	1127	GPD1	Plate 04	E04	0.314325	0.472925	0.1586
orf19.7245	1129		Plate 04	E05	0.309725	0.413525	0.1038
caydl037c	1131		Plate 04	E06	0.3344	0.730175	0.395775
orf19.4761	1133	HST1	Plate 04	E07	0.292975	0.363075	0.0701
orf19.250	1135	SLC1	Plate 04	E08	0.33975	0.363225	0.023475
orf19.1564	1137		Plate 04	E09	0.3177	0.413125	0.095425
orf19.5323	1139	MDH1-3	Plate 04	E10	0.31345	0.45445	0.141
orf19.5171	1144	PMT1	Plate 04	E11	0.3528	0.013925	-0.338875
orf19.1548	1145		Plate 04	E12	0.446025	0.191275	-0.25475
orf19.5627	925		Plate 04	F01	0.33285	0.41075	0.0779
orf19.5117	781	OLE1	Plate 04	F02	0.123675	0.00965	-0.114025
orf19.829	1541	SCH9	Plate 04	F03	0.42115	0.39325	-0.0279
orf19.6000	3732	CDR1	Plate 04	F04	0.331675	0.492975	0.1613
orf19.4809	538	ERG12	Plate 04	F05	0.373775	0.196575	-0.1772
orf19.2929	59	GSC1	Plate 04	F06	0.418425	0.019325	-0.3991
orf19.4152	799	CEF3	Plate 04	F07	0.46335	0.020925	-0.442425
orf19.7478	957		Plate 04	F08	0.30435	0.416225	0.111875
orf19.5463	192	SEC6	Plate 04	F09	0.322625	0.03655	-0.286075
orf19.406	1230	ERG1	Plate 04	F10	0.25805	0.08335	-0.1747
orf19.3174	196	CDC24	Plate 04	F11	0.314775	0.0352	-0.279575
orf19.5949	1193	FAS2	Plate 04	F12	0.192225	0.064275	-0.12795
orf19.4882	206		Plate 04	G01	0.36945	0.345025	-0.024425
orf19.6511	50	LIG1	Plate 04	G02	0.38225	0.41095	0.0287
orf19.5759	1521	SNQ2	Plate 04	G03	0.34085	0.496	0.15515
orf19.3740	3019	PGA23	Plate 04	G04	0.336325	0.41995	0.083625
orf19.6034	828	TUB2	Plate 04	G05	0.320425	0.09095	-0.229475
orf19.4618	305	FBA1	Plate 04	G06	0.16535	0.084975	-0.080375
orf19.7265	649		Plate 04	G07	0.348525	0.379675	0.03115
orf19.7572	992	SPT7	Plate 04	G08	0.38255	0.443375	0.060825
orf19.5364	988		Plate 04	G09	0.334875	0.3895	0.054625
orf19.1011	966	MNN21	Plate 04	G10	0.35125	0.37605	0.0248
orf19.136	981		Plate 04	G11	0.3716	0.436325	0.064725
orf19.7124	1083	RVS161	Plate 04	G12	0.43025	0.482225	0.051975
orf19.5964	1181	ARF2	Plate 04	H01	0.273125	0.017625	-0.2555
orf19.4650	1066	ILV6	Plate 04	H02	0.385225	0.4613	0.076075
orf19.5808	1053		Plate 04	H03	0.37705	0.473175	0.096125
orf19.3792	1110		Plate 04	H04	0.374625	0.4745	0.099875
orf19.3363	1629	VTC4	Plate 04	H05	0.447125	0.444925	-0.00219999
orf19.6460	2049	PEX1	Plate 04	H06	0.3951	0.49075	0.09565
orf19.6804	1561		Plate 04	H07	0.364675	0.3731	0.008425
orf19.2281	1378		Plate 04	H08	0.4022	0.454	0.0518
orf19.1306	1390		Plate 04	H09	0.383275	0.4511	0.067825
orf19.3539	1011		Plate 04	H10	0.4624	0.439125	-0.023275
orf19.4930	1547	SPC3	Plate 04	H11	0.465675	0.1829	-0.282775
orf19.6155	1533		Plate 04	H12	0.470825	0.2891	-0.181725
orf19.2462	1429	PRN3	Plate 05	A01	0.446375	0.457175	0.0108
orf19.5294	1038	PDB1	Plate 05	A02	0.3776	0.42995	0.05235
orf19.4927	1168	BNI1	Plate 05	A03	0.374525	0.44215	0.067625
orf19.2501	1300	FLC1	Plate 05	A04	0.384775	0.440975	0.0562
orf19.6323	3827	HPA2	Plate 05	A05	0.3929	0.460325	0.067425
orf19.5917	3831	STP3	Plate 05	A06	0.3881	0.4294	0.0413
orf19.639	4084		Plate 05	A07	0.36385	0.464125	0.100275
orf19.1862	4151		Plate 05	A08	0.35855	0.4366	0.07805
orf19.3533	4161		Plate 05	A09	0.352825	0.457125	0.1043
orf19.652	3780		Plate 05	A10	0.36765	0.42775	0.0601
orf19.696	3782	STE2	Plate 05	A11	0.426175	0.4015	-0.024675
orf19.1528	3787		Plate 05	A12	0.503875	0.180575	-0.3233
orf19.4816	3798		Plate 05	B01	0.4355	0.4601	0.0246
orf19.4887	3802	ECM21	Plate 05	B02	0.29645	0.384875	0.088425
orf19.1250	3814		Plate 05	B03	0.35465	0.402375	0.047725
orf19.2934	3858		Plate 05	B04	0.343	0.501775	0.158775
orf19.3367	3868		Plate 05	B05	0.349225	0.327675	-0.02155
orf19.203	3889	STB3	Plate 05	B06	0.38165	0.4139	0.03225
orf19.6717	3891		Plate 05	B07	0.29975	0.4606	0.16085
orf19.7038	3925		Plate 05	B08	0.319875	0.489625	0.16975
orf19.414	3962		Plate 05	B09	0.313875	0.323225	0.00935001
orf19.415	3979		Plate 05	B10	0.297625	0.497975	0.20035
orf19.4176	4016		Plate 05	B11	0.36065	0.188375	-0.172275
orf19.386	4028	SAM4	Plate 05	B12	0.41325	0.400125	-0.013125
orf19.6885	4029	SPO7	Plate 05	C01	0.372475	0.391475	0.019
orf19.4357	3999		Plate 05	C02	0.3848	0.36415	-0.02065
orf19.1533	3788		Plate 05	C03	0.32585	0.356425	0.030575
orf19.4844	3800		Plate 05	C04	0.355575	0.3649	0.009325
orf19.4866	3801	CPP1	Plate 05	C05	0.3298	0.373425	0.043625
orf19.5278	3887		Plate 05	C06	0.334575	0.274325	-0.06025
orf19.3022	3888		Plate 05	C07	0.33685	0.421925	0.085075
orf19.2199	3920	PHO86	Plate 05	C08	0.28875	0.372525	0.083775
orf19.2363	3938		Plate 05	C09	0.355125	0.4006	0.045475
orf19.6071	3973		Plate 05	C10	0.379375	0.415075	0.0357
orf19.7237	4005		Plate 05	C11	0.343025	0.383275	0.04025
orf19.6851	4007	CHL4	Plate 05	C12	0.45245	0.390775	-0.061675
orf19.3659	4015		Plate 05	D01	0.33555	0.380925	0.045375
orf19.3263	4027	ATO10	Plate 05	D02	0.3157	0.3272	0.0115
orf19.3954	1678		Plate 05	D03	0.344325	0.391125	0.0468
orf19.4722	3792		Plate 05	D04	0.346075	0.3804	0.034325
orf19.4958	3804	ECM25	Plate 05	D05	0.35315	0.435875	0.082725
orf19.5270	3873		Plate 05	D06	0.3477	0.391725	0.044025
orf19.6029	3890	ROT1	Plate 05	D07	0.349675	0.245075	-0.1046
orf19.947	3972	MRP17	Plate 05	D08	0.28765	0.239975	-0.047675
orf19.7385	4001		Plate 05	D09	0.315925	0.37695	0.061025
orf19.3624	3819		Plate 05	D10	0.3288	0.3909	0.0621
orf19.3574	3822	MDJ2	Plate 05	D11	0.300425	0.391975	0.09155
orf19.3937	4072		Plate 05	D12	0.449825	0.42975	-0.020075
orf19.4011	4075		Plate 05	E01	0.423475	0.419475	-0.004
orf19.6681	4076		Plate 05	E02	0.361875	0.385225	0.02335
orf19.5601	4078		Plate 05	E03	0.36675	0.388375	0.021625
orf19.612	4102		Plate 05	E04	0.32735	0.339025	0.011675
orf19.1773	4103	RAP1	Plate 05	E05	0.328025	0.41895	0.090925
orf19.2060	4146	SOD5	Plate 05	E06	0.32625	0.378625	0.052375
orf19.944	4165	IFG3	Plate 05	E07	0.368975	0.37095	0.001975
orf19.3282	4046	BMT3	Plate 05	E08	0.289075	0.349075	0.06
orf19.3362	4052		Plate 05	E09	0.3447	0.30955	-0.03515
orf19.5016	4053		Plate 05	E10	0.2663	0.344075	0.077775
orf19.1632	4054		Plate 05	E11	0.33415	0.379725	0.045575
orf19.2238	4055	LTE1	Plate 05	E12	0.24655	0.350175	0.103625
orf19.1681	4058		Plate 05	F01	0.4293	0.42	-0.00930001
orf19.2303	4059	FGR16	Plate 05	F02	0.323625	0.459875	0.13625
orf19.2973	4060		Plate 05	F03	0.337675	0.37805	0.040375
orf19.2064	4061		Plate 05	F04	0.393	0.394725	0.001725
orf19.2343	4062	VPS23	Plate 05	F05	0.34065	0.41025	0.0696
orf19.752	4065		Plate 05	F06	0.339525	0.39405	0.054525
orf19.1866	4067	VMA10	Plate 05	F07	0.3303	0.148975	-0.181325
orf19.3170	4087		Plate 05	F08	0.34105	0.426225	0.085175
orf19.4577	4093		Plate 05	F09	0.339025	0.38125	0.042225
orf19.5250	4095		Plate 05	F10	0.324425	0.37665	0.052225
orf19.3627	4097		Plate 05	F11	0.3186	0.402075	0.083475
orf19.2418	4099		Plate 05	F12	0.43605	0.423575	-0.012475
orf19.1058	4122		Plate 05	G01	0.368975	0.514025	0.14505
orf19.927	4144		Plate 05	G02	0.35085	0.303475	-0.047375
orf19.4922	4174		Plate 05	G03	0.342525	0.42055	0.078025
orf19.4701	4179		Plate 05	G04	0.34745	0.415225	0.067775
orf19.2564	4104		Plate 05	G05	0.29765	0.35705	0.0594
orf19.6035	4183		Plate 05	G06	0.35585	0.392675	0.036825
orf19.4929	4195		Plate 05	G07	0.338025	0.323575	-0.01445
orf19.2961	4056		Plate 05	G08	0.344175	0.44205	0.097875
orf19.4639	4057		Plate 05	G09	0.3188	0.40575	0.08695
orf19.713	4063		Plate 05	G10	0.333325	0.38585	0.052525
orf19.5213	4261		Plate 05	G11	0.34945	0.297175	-0.052275
orf19.5646	4156		Plate 05	G12	0.455075	0.4854	0.030325
orf19.273	4180		Plate 05	H01	0.47455	0.458675	-0.015875
orf19.4843	3799		Plate 05	H02	0.4075	0.43275	0.02525
orf19.3012	3874	ARO80	Plate 05	H03	0.4247	0.447825	0.023125
orf19.7503	3918	CDA2	Plate 05	H04	0.443525	0.45715	0.013625
orf19.2308	3988		Plate 05	H05	0.430525	0.446025	0.0155
orf19.6869	4013		Plate 05	H06	0.418825	0.4609	0.042075
orf19.2660	3824	EAF3	Plate 05	H07	0.4266	0.49905	0.07245
orf19.577	3882		Plate 05	H08	0.4032	0.482725	0.079525
orf19.2400	4004		Plate 05	H09	0.368425	0.46045	0.092025
orf19.4062	3540	TRY2	Plate 05	H10	0.50365	0.459675	-0.043975
orf19.1224	1084	FRP3	Plate 05	H11	0.491025	0.4382	-0.052825
orf19.1844	3030		Plate 05	H12	0.446125	0.421975	-0.02415
orf19.6143	3035		Plate 06	A01	0.440475	0.472125	0.03165
orf19.2839	2937	CIRT4B	Plate 06	A02	0.45285	0.522775	0.069925
orf19.1568	2513		Plate 06	A03	0.4635	0.489675	0.026175
orf19.5953	3482		Plate 06	A04	0.465275	0.49275	0.027475
orf19.4370	3416		Plate 06	A05	0.41515	0.46455	0.0494
orf19.121	3519	ARC18	Plate 06	A06	0.451375	0.52805	0.076675
orf19.2881	3415	MNN4	Plate 06	A07	0.404175	0.527125	0.12295
orf19.3226	3634		Plate 06	A08	0.383675	0.46755	0.083875
orf19.1040	1319	MAD2	Plate 06	A09	0.392625	0.5862	0.193575
orf19.4758	1416		Plate 06	A10	0.393425	0.508	0.114575
orf19.3986	3232	PPR1	Plate 06	A11	0.427625	0.510425	0.0828
orf19.3237	3299		Plate 06	A12	0.50015	0.48585	-0.0143
orf19.5024	1581	GND1	Plate 06	B01	0.4399	0.0169	-0.423
orf19.2727	1570	GRX3	Plate 06	B02	0.34705	0.46365	0.1166
orf19.5630	1567	APA2	Plate 06	B03	0.350575	0.4603	0.109725
orf19.144	1545	SNU114	Plate 06	B04	0.346225	0.223425	-0.1228
orf19.3050	1263	AGE1	Plate 06	B05	0.34	0.44415	0.10415
orf19.1614	1597	MEP1	Plate 06	B06	0.3322	0.4843	0.1521
orf19.2551	1622	MET6	Plate 06	B07	0.302175	0.104425	-0.19775
orf19.1986	1602	ARO2	Plate 06	B08	0.268775	0.03915	-0.229625
orf19.3465	1820	RPL10A	Plate 06	B09	0.38185	0.02445	-0.3574
orf19.1517	1781	ARO3	Plate 06	B10	0.355675	0.461525	0.10585
orf19.3455	1630		Plate 06	B11	0.453675	0.461775	0.0081
orf19.568	1908	SPE2	Plate 06	B12	0.41145	0.574125	0.162675
orf19.445	1271		Plate 06	C01	0.435175	0.527575	0.0924
orf19.978	1569	BDF1	Plate 06	C02	0.33545	0.038375	-0.297075
orf19.3175	1612		Plate 06	C03	0.348325	0.4651	0.116775
orf19.804	1696		Plate 06	C04	0.36915	0.423375	0.054225
orf19.1149	1717	MRF1	Plate 06	C05	0.388925	0.409475	0.02055
orf19.5220	1809		Plate 06	C06	0.35325	0.410625	0.057375
orf19.5645	1885	MET15	Plate 06	C07	0.3414	0.428825	0.087425
orf19.4371	1886	TAL1	Plate 06	C08	0.310275	0.443275	0.133
orf19.58	1888	RRP6	Plate 06	C09	0.33645	0.425075	0.088625
orf19.4754	1890	ZWF1	Plate 06	C10	0.337825	0.33355	-0.00427499
orf19.4299	1892	MSW1	Plate 06	C11	0.33275	0.443175	0.110425
orf19.4306	1894		Plate 06	C12	0.469525	0.49055	0.021025
orf19.4308	1895	HSL1	Plate 06	D01	0.350075	0.444475	0.0944
orf19.2580	1902	HST2	Plate 06	D02	0.36885	0.438125	0.069275
orf19.2738	1906	SUL2	Plate 06	D03	0.348375	0.408875	0.0605
orf19.578	1909		Plate 06	D04	0.37035	0.407375	0.037025
orf19.3340	1910	SOD2	Plate 06	D05	0.369025	0.408225	0.0392
orf19.5053	208		Plate 06	D06	0.31085	0.317	0.00614999
orf19.6537	209		Plate 06	D07	0.327225	0.1174	-0.209825
orf19.5610	1941	ARG3	Plate 06	D08	0.312625	0.40555	0.092925
orf19.4807	1956		Plate 06	D09	0.3392	0.4261	0.0869
orf19.4813	1958	GUA1	Plate 06	D10	0.33045	0.403	0.07255
orf19.1362	1962	SMM1	Plate 06	D11	0.348425	0.440175	0.09175
orf19.3715	1964	ASF1	Plate 06	D12	0.36485	0.3955	0.03065
orf19.6165	1965	KGD1	Plate 06	E01	0.44015	0.247975	-0.192175
orf19.1404	1974		Plate 06	E02	0.385325	0.433875	0.04855
orf19.6316	1989		Plate 06	E03	0.3255	0.358675	0.033175
orf19.2333	1995		Plate 06	E04	0.3628	0.43725	0.07445
orf19.3983	2010		Plate 06	E05	0.332775	0.419525	0.08675
orf19.2987	2014		Plate 06	E06	0.368075	0.419025	0.05095
orf19.3131	2030	OYE32	Plate 06	E07	0.437825	0.43385	-0.003975
orf19.4031	2105		Plate 06	E08	0.390825	0.427775	0.03695
orf19.4035	2106	PGA4	Plate 06	E09	0.35365	0.417275	0.063625
orf19.4040	2107	ILV3	Plate 06	E10	0.32305	0.30705	-0.016
orf19.3038	2148	TPS2	Plate 06	E11	0.379225	0.464975	0.08575
orf19.7016	2162	PHM5	Plate 06	E12	0.450925	0.51315	0.062225
orf19.2871	1878	SDH12	Plate 06	F01	0.439525	0.4998	0.060275
orf19.5702	1896		Plate 06	F02	0.322375	0.4023	0.079925
orf19.1576	1969		Plate 06	F03	0.33475	0.40535	0.0706
orf19.6324	1991	VID27	Plate 06	F04	0.37115	0.4216	0.05045
orf19.2337	1993	ALP1	Plate 06	F05	0.33725	0.401775	0.064525
orf19.5243	2137	TRP3	Plate 06	F06	0.36255	0.424325	0.061775
orf19.2107	1913	MUQ1	Plate 06	F07	0.4365	0.463325	0.026825
orf19.5628	1915		Plate 06	F08	0.341475	0.439	0.097525
orf19.1720	1920		Plate 06	F09	0.279825	0.354675	0.07485
orf19.2844	1928		Plate 06	F10	0.370575	0.376125	0.00555
orf19.4518	1932		Plate 06	F11	0.398825	0.421425	0.0226
orf19.3330	1935	CRL1	Plate 06	F12	0.450675	0.485	0.034325
orf19.3325	1937		Plate 06	G01	0.43305	0.4455	0.01245
orf19.3467	1228		Plate 06	G02	0.242175	0.01705	-0.225125
orf19.4441	19		Plate 06	G03	0.359575	0.40885	0.049275
orf19.2133	1439	LIP4	Plate 06	G04	0.3931	0.45705	0.06395
orf19.3854	1082		Plate 06	G05	0.353375	0.39705	0.043675
orf19.6730	1086		Plate 06	G06	0.3678	0.4482	0.0804
orf19.4526	1089	HSP30	Plate 06	G07	0.38385	0.425125	0.041275
orf19.5994	1092	RHB1	Plate 06	G08	0.34905	0.426	0.07695
orf19.5671	1094		Plate 06	G09	0.3827	0.422125	0.039425
orf19.908	1095	FEN12	Plate 06	G10	0.37025	0.4792	0.10895
orf19.7463	1099		Plate 06	G11	0.383625	0.424475	0.04085
orf19.1966	1101	BUD23	Plate 06	G12	0.470575	0.18045	-0.290125
orf19.3407	1107		Plate 06	H01	0.422275	0.4535	0.031225
orf19.2443	1050	RGD1	Plate 06	H02	0.390125	0.491125	0.101
orf19.459	1085	ADP1	Plate 06	H03	0.4329	0.469575	0.036675
orf19.7330	1088		Plate 06	H04	0.4442	0.461575	0.017375
orf19.1671	1219	UTR2	Plate 06	H05	0.42415	0.463975	0.039825
orf19.6578	1334		Plate 06	H06	0.4269	0.55735	0.13045
orf19.6740	251		Plate 06	H07	0.4723	0.527325	0.055025
orf19.308	1509		Plate 06	H08	0.417975	0.47345	0.055475
orf19.1988	123	CDC45	Plate 06	H09	0.453975	0.3382	-0.115775
orf19.2965	1146		Plate 06	H10	0.427125	0.444125	0.017
orf19.4160	1147		Plate 06	H11	0.4314	0.485575	0.054175
orf19.4001	1149		Plate 06	H12	0.30045	0.459625	0.159175
orf19.5038	1150		Plate 07	A01	0.4851	0.453575	-0.031525
orf19.6498	1152		Plate 07	A02	0.479975	0.424225	-0.05575
orf19.1804	1154		Plate 07	A03	0.4798	0.40865	-0.07115
orf19.3606	1156		Plate 07	A04	0.5126	0.45145	-0.06115
orf19.2341	1158	HNT1	Plate 07	A05	0.417825	0.448875	0.03105
orf19.7188	1161	RPP1B	Plate 07	A06	0.485875	0.44185	-0.044025
orf19.1683	1163	PPH21	Plate 07	A07	0.47605	0.475025	-0.00102498
orf19.5061	1620	ADE5,7	Plate 07	A08	0.469475	0.09355	-0.375925
orf19.955	1275		Plate 07	A09	0.483475	0.321075	-0.1624
orf19.6901	1251		Plate 07	A10	0.489975	0.452925	-0.03705
orf19.6994	1246	BAT22	Plate 07	A11	0.536625	0.445275	-0.09135
orf19.7520	1247	POT1	Plate 07	A12	0.490225	0.454425	-0.0358
orf19.3006	1248		Plate 07	B01	0.42975	0.446525	0.016775
orf19.2166	1249	VMA5	Plate 07	B02	0.477575	0.328375	-0.1492
orf19.3711	1436		Plate 07	B03	0.46575	0.436725	-0.029025
orf19.968	1266	PGA14	Plate 07	B04	0.4418	0.4252	-0.0166
orf19.118	1350	FAD2	Plate 07	B05	0.448025	0.470975	0.02295
orf19.4000	1148	GRF10	Plate 07	B06	0.432675	0.434275	0.00160001
orf19.6502	1151		Plate 07	B07	0.434575	0.4439	0.00932501
orf19.3911	1226	SAH1	Plate 07	B08	0.40265	0.42085	0.0182
orf19.1970	1279		Plate 07	B09	0.4973	0.42945	-0.06785
orf19.5966	1286		Plate 07	B10	0.471025	0.351875	-0.11915
orf19.4416	1295	VPS13	Plate 07	B11	0.4303	0.42895	-0.00135
orf19.7332	1526	ELF1	Plate 07	B12	0.5015	0.539575	0.038075
orf19.7011	135		Plate 07	C01	0.46635	0.385325	-0.081025
orf19.4889	1520		Plate 07	C02	0.50085	0.409025	-0.091825
orf19.1977	1608	URA4	Plate 07	C03	0.404275	0.432775	0.0285
orf19.5234	1467	RBD1	Plate 07	C04	0.43395	0.4041	-0.02985
orf19.4856	1454	LIP3	Plate 07	C05	0.4565	0.393625	-0.062875
orf19.1949	1648	VPS1	Plate 07	C06	0.35315	0.32115	-0.032
orf19.691	1649	GPD2	Plate 07	C07	0.417975	0.45115	0.033175
orf19.1747	1652	KIP2	Plate 07	C08	0.355025	0.456025	0.101
orf19.3526	1653	ITR1	Plate 07	C09	0.42125	0.40775	-0.0135
orf19.4736	1656		Plate 07	C10	0.44165	0.42685	-0.0148
orf19.7396	1355		Plate 07	C11	0.4508	0.4523	0.00150001
orf19.873	1356		Plate 07	C12	0.502975	0.48065	-0.022325
orf19.4461	1359		Plate 07	D01	0.359825	0.468175	0.10835
orf19.314	1443		Plate 07	D02	0.447575	0.342075	-0.1055
orf19.6569	1461		Plate 07	D03	0.44025	0.4448	0.00455001
orf19.5337	1474	UBC15	Plate 07	D04	0.38545	0.416875	0.031425
orf19.5079	1507	CDR4	Plate 07	D05	0.43175	0.4109	-0.02085
orf19.6060	1508	GCN20	Plate 07	D06	0.398975	0.3988	-0.000174999
orf19.635	1281		Plate 07	D07	0.375075	0.3639	-0.011175
orf19.1606	1283		Plate 07	D08	0.432925	0.4358	0.00287499
orf19.5727	1285		Plate 07	D09	0.416025	0.403775	-0.01225
orf19.2172	1014	ARA1	Plate 07	D10	0.40265	0.4093	0.00665001
orf19.4534	1054		Plate 07	D11	0.4	0.426475	0.026475
orf19.3613	1055		Plate 07	D12	0.471425	0.538825	0.0674
orf19.3064	1057	MRPL27	Plate 07	E01	0.510175	0.297425	-0.21275
orf19.1204	1060		Plate 07	E02	0.43755	0.402275	-0.035275
orf19.4599	1063	PHO89	Plate 07	E03	0.3966	0.386725	-0.00987499
orf19.3981	1064	MAL31	Plate 07	E04	0.4093	0.41855	0.00925
orf19.7074	1067		Plate 07	E05	0.436175	0.441575	0.00539999
orf19.7083	1068	DCC1	Plate 07	E06	0.419975	0.430175	0.0102
orf19.3292	1072		Plate 07	E07	0.418625	0.4063	-0.012325
orf19.734	1075	GLK1	Plate 07	E08	0.4436	0.440525	-0.00307501
orf19.4953	1076		Plate 07	E09	0.3923	0.38945	-0.00285
orf19.3736	1077	KAR4	Plate 07	E10	0.414375	0.407125	-0.00725
orf19.7404	1080		Plate 07	E11	0.4087	0.419175	0.010475
orf19.548	1081	CDC10	Plate 07	E12	0.43255	0.48395	0.0514
orf19.807	1695	CHS5	Plate 07	F01	0.50745	0.48095	-0.0265
orf19.7522	1488		Plate 07	F02	0.4398	0.394	-0.0458
orf19.2194	1873		Plate 07	F03	0.441925	0.41435	-0.027575
orf19.2193	1874	PRS5	Plate 07	F04	0.41905	0.4032	-0.01585
orf19.3507	1876	MCR1	Plate 07	F05	0.399375	0.46695	0.067575
orf19.1795	1877	PUF3	Plate 07	F06	0.3243	0.4099	0.0856
orf19.5640	1883	PEX5	Plate 07	F07	0.456375	0.46515	0.008775
orf19.6176	525	SEC61	Plate 07	F08	0.2993	0.004325	-0.294975
orf19.3681	524		Plate 07	F09	0.448525	0.127675	-0.32085
orf19.150	471	TIM17	Plate 07	F10	0.361425	0.042525	-0.3189
orf19.2967	537	TIF34	Plate 07	F11	0.352425	0.0113	-0.341125
orf19.1578	540		Plate 07	F12	0.49335	0.4886	-0.00475
orf19.2694	430	TYS1	Plate 07	G01	0.484175	0.3873	-0.096875
orf19.1261	424	CGT1	Plate 07	G02	0.45365	0.465775	0.012125
orf19.4367	413	SMC1	Plate 07	G03	0.44645	0.311575	-0.134875
orf19.4577.3	436	TIM10	Plate 07	G04	0.4139	0.3807	-0.0332
orf19.5623	467	ARP4	Plate 07	G05	0.421025	0.329225	-0.0918
orf19.1335	464		Plate 07	G06	0.416125	0.250975	-0.16515
orf19.7307	532		Plate 07	G07	0.3985	0.4466	0.0481
orf19.6355	536		Plate 07	G08	0.433975	0.383325	-0.05065
orf19.7335	530	PRE8	Plate 07	G09	0.39345	0.152325	-0.241125
orf19.4799	539		Plate 07	G10	0.3817	0.084625	-0.297075
orf19.6908	534		Plate 07	G11	0.41675	0.4345	0.01775
orf19.7222	469	PAM16	Plate 07	G12	0.46805	0.192325	-0.275725
orf19.262	466	SMC3	Plate 07	H01	0.490725	0.4634	-0.027325
orf19.3259	461		Plate 07	H02	0.4758	0.497225	0.021425
orf19.5184	421		Plate 07	H03	0.46875	0.368575	-0.100175
orf19.4993	268	SEC18	Plate 07	H04	0.5394	0.1834	-0.356
orf19.4004	463	CCT3	Plate 07	H05	0.54305	0.041575	-0.501475
orf19.6649	433	BRF1	Plate 07	H06	0.493225	0.2162	-0.277025
orf19.7552	531		Plate 07	H07	0.473	0.413075	-0.059925
orf19.718	171	RRN11	Plate 07	H08	0.487125	0.5139	0.026775
orf19.3541	272	ERF1	Plate 07	H09	0.44735	0.437375	-0.009975
orf19.3873	277	ARC40	Plate 07	H10	0.5082	0.269975	-0.238225
orf19.213	400		Plate 07	H11	0.456925	0.02305	-0.433875
orf19.1283	401	MEC1	Plate 07	H12	0.475675	0.499	0.023325
orf19.5959	404	NOP14	Plate 08	A01	0.539225	0.51385	-0.025375
orf19.6652	452	DBP8	Plate 08	A02	0.526675	0.431125	-0.09555
orf19.1248	455		Plate 08	A03	0.532925	0.1559	-0.377025
orf19.5260	456	RPN2	Plate 08	A04	0.51335	0.0688	-0.44455
orf19.5685	457	THS1	Plate 08	A05	0.387325	0.02385	-0.363475
orf19.3052	393	YPT1	Plate 08	A06	0.43135	0.1604	-0.27095
orf19.487	596	SPT14	Plate 08	A07	0.452075	0.440275	-0.0118
orf19.6584	716	PRT1	Plate 08	A08	0.438925	0.4871	0.048175
orf19.538	590		Plate 08	A09	0.428225	0.2138	-0.214425
orf19.747	653	NBP35	Plate 08	A10	0.5005	0.420725	-0.079775
orf19.544.1	707	PRE6	Plate 08	A11	0.417525	0.013075	-0.40445
orf19.485	715		Plate 08	A12	0.487275	0.062825	-0.42445
orf19.4775	652	CTA8	Plate 08	B01	0.494875	0.11695	-0.377925
orf19.3540	271	MAK5	Plate 08	B02	0.58765	0.2984	-0.28925
orf19.1674	300	CDC53	Plate 08	B03	0.515325	0.393475	-0.12185
orf19.1701	709	RKI1	Plate 08	B04	0.4874	0.451775	-0.035625
orf19.7261	411		Plate 08	B05	0.3782	0.29985	-0.07835
orf19.2105	255		Plate 08	B06	0.510525	0.506475	-0.00405002
orf19.1282	270	CKS1	Plate 08	B07	0.43985	0.2684	-0.17145
orf19.2677	335		Plate 08	B08	0.380825	0.34615	-0.034675
orf19.4032	403	RPN5	Plate 08	B09	0.500175	0.04145	-0.458725
orf19.536	275		Plate 08	B10	0.498575	0.2543	-0.244275
orf19.2611	656	MCM6	Plate 08	B11	0.461725	0.1607	-0.301025
orf19.7057	657		Plate 08	B12	0.42095	0.190825	-0.230125
orf19.7441	658		Plate 08	C01	0.53655	0.481475	-0.055075
orf19.5436	662	UTP8	Plate 08	C02	0.4949	0.4608	-0.0341
orf19.1460	663		Plate 08	C03	0.52595	0.448225	-0.077725
orf19.239	666		Plate 08	C04	0.502025	0.248925	-0.2531
orf19.886	667	PAN1	Plate 08	C05	0.486675	0.391875	-0.0948
orf19.4479	668		Plate 08	C06	0.496175	0.4037	-0.092475
orf19.5801	670	RNR21	Plate 08	C07	0.449375	0.1817	-0.267675
orf19.7511	671		Plate 08	C08	0.3996	0.35265	-0.04695
orf19.3234.1	674	SFT1	Plate 08	C09	0.4318	0.232875	-0.198925
orf19.6163	675	CSE4	Plate 08	C10	0.48675	0.1342	-0.35255
orf19.903	676	GPM1	Plate 08	C11	0.458075	0.20805	-0.250025
orf19.6284	677		Plate 08	C12	0.460075	0.37955	-0.080525
orf19.5244	678	MCD4	Plate 08	D01	0.499925	0.429975	-0.06995
orf19.325	683		Plate 08	D02	0.508925	0.1284	-0.380525
orf19.4281	685	IFH1	Plate 08	D03	0.4445	0.456875	0.012375
orf19.5391	688		Plate 08	D04	0.494	0.42645	-0.06755
orf19.3000	689	ORC1	Plate 08	D05	0.4803	0.3584	-0.1219
orf19.6010	691	CDC5	Plate 08	D06	0.4258	0.1708	-0.255
orf19.2675	697		Plate 08	D07	0.45645	0.100925	-0.355525
orf19.3059	723	SUA71	Plate 08	D08	0.456375	0.3185	-0.137875
orf19.2672	619	NCP1	Plate 08	D09	0.454075	0.357675	-0.0964
orf19.603	321	IMP4	Plate 08	D10	0.503375	0.2052	-0.298175
orf19.3474	720	IPL1	Plate 08	D11	0.37775	0.036325	-0.341425
orf19.5358	633		Plate 08	D12	0.453675	0.36895	-0.084725
orf19.7178	545	PRE5	Plate 08	E01	0.51425	0.150025	-0.364225
orf19.4093	428	PES1	Plate 08	E02	0.50395	0.14545	-0.3585
orf19.5413	718		Plate 08	E03	0.498125	0.3767	-0.121425
orf19.2437	629	ARC35	Plate 08	E04	0.40845	0.138225	-0.270225
orf19.1085	638		Plate 08	E05	0.45355	0.4196	-0.03395
orf19.6783	717		Plate 08	E06	0.3488	0.40285	0.05405
orf19.1560	529	POB3	Plate 08	E07	0.485675	0.425725	-0.05995
orf19.7581	541		Plate 08	E08	0.461375	0.32785	-0.133525
orf19.3206	470	CCT7	Plate 08	E09	0.5266	0.019425	-0.507175
orf19.757	3750		Plate 08	E10	0.429075	0.41665	-0.012425
orf19.2468	3760		Plate 08	E11	0.4482	0.4309	-0.0173
orf19.2751	3765		Plate 08	E12	0.545925	0.489175	-0.05675
orf19.1089	3768	PEX11	Plate 08	F01	0.540125	0.51345	-0.026675
orf19.3142	3770		Plate 08	F02	0.48765	0.44475	-0.0429
orf19.1010	3773	MNT3	Plate 08	F03	0.43945	0.3897	-0.04975
orf19.2781	3778		Plate 08	F04	0.496575	0.414925	-0.08165
orf19.4459	3869		Plate 08	F05	0.463	0.392275	-0.070725
orf19.2665	3894	MSN5	Plate 08	F06	0.42035	0.3472	-0.07315
orf19.59	3991	REI1	Plate 08	F07	0.4085	0.427075	0.018575
orf19.1114	3998		Plate 08	F08	0.485375	0.4262	-0.059175
orf19.6736	3908		Plate 08	F09	0.391575	0.446675	0.0551
orf19.2304	3971		Plate 08	F10	0.481525	0.418825	-0.0627
orf19.1537	3734		Plate 08	F11	0.4093	0.4453	0.036
orf19.1339	3739	CPY1	Plate 08	F12	0.48525	0.44	-0.04525
orf19.4466	3740		Plate 08	G01	0.5386	0.47265	-0.06595
orf19.6738	3759	VAN1	Plate 08	G02	0.50375	0.46995	-0.0338
orf19.2474	3761	PRC3	Plate 08	G03	0.4948	0.458575	-0.036225
orf19.2538	3762	PTC2	Plate 08	G04	0.45605	0.361175	-0.094875
orf19.2709	3763	ZUO1	Plate 08	G05	0.405925	0.43685	0.030925
orf19.6538	3766	VMA11	Plate 08	G06	0.461425	0.438875	-0.02255
orf19.1084	3767	CDC39	Plate 08	G07	0.561175	0.179425	-0.38175
orf19.1161	3769	PLD1	Plate 08	G08	0.5108	0.40935	-0.10145
orf19.799	3775	STE4	Plate 08	G09	0.452	0.421475	-0.030525
orf19.1734	3749		Plate 08	G10	0.37335	0.31555	-0.0578
orf19.671	3781	PSP1	Plate 08	G11	0.450225	0.40135	-0.048875
orf19.4778	3797	LYS142	Plate 08	G12	0.5445	0.470175	-0.074325
orf19.4563	3809		Plate 08	H01	0.5934	0.50065	-0.09275
orf19.2094	3883	PDR6	Plate 08	H02	0.53695	0.48885	-0.0481
orf19.7460	3886		Plate 08	H03	0.439875	0.504875	0.065
orf19.2887	3921		Plate 08	H04	0.5351	0.50055	-0.03455
orf19.758	3930		Plate 08	H05	0.51735	0.495925	-0.021425
orf19.4279	3966	MNN1	Plate 08	H06	0.5428	0.484175	-0.058625
orf19.6082	4006		Plate 08	H07	0.410525	0.5009	0.090375
orf19.7096	4008		Plate 08	H08	0.45225	0.5261	0.07385
orf19.425	4012		Plate 08	H09	0.4526	0.483275	0.030675
orf19.1016	4023		Plate 08	H10	0.46115	0.490075	0.028925
orf19.3476	719		Plate 08	H11	0.537825	0.452725	-0.0851
orf19.2040	722		Plate 08	H12	0.521925	0.476425	-0.0455
orf19.1687	423		Plate 09	A01	0.52645	0.61	0.08355
orf19.1254	727	SEC23	Plate 09	A02	0.508	0.50345	-0.00455
orf19.2230	724		Plate 09	A03	0.487675	0.508175	0.0205
orf19.4293	640		Plate 09	A04	0.5093	0.49035	-0.01895
orf19.3251	624	ARC19	Plate 09	A05	0.52025	0.412175	-0.108075
orf19.1883	626	YCS4	Plate 09	A06	0.4884	0.307125	-0.181275
orf19.1457	497		Plate 09	A07	0.494075	0.43225	-0.061825
orf19.6340	634		Plate 09	A08	0.492225	0.06765	-0.424575
orf19.5513	632		Plate 09	A09	0.517675	0.05605	-0.461625
orf19.3524	725	CRK1	Plate 09	A10	0.478525	0.544	0.065475
orf19.5174	690	TAF19	Plate 09	A11	0.48465	0.4449	-0.03975
orf19.1444	3733		Plate 09	A12	0.42325	0.34185	-0.0814
orf19.3545	3738		Plate 09	B01	0.50735	0.46375	-0.0436
orf19.4961	3805	STP2	Plate 09	B02	0.4867	0.409625	-0.077075
orf19.4967	3807	COX19	Plate 09	B03	0.421525	0.406	-0.015525
orf19.5214	3826	VPS33	Plate 09	B04	0.432	0.438675	0.006675
orf19.2106	3897		Plate 09	B05	0.439825	0.4348	-0.00502499
orf19.3799	3952		Plate 09	B06	0.4358	0.4442	0.00839999
orf19.3176	3963	RIM21	Plate 09	B07	0.4174	0.470625	0.053225
orf19.307	3987		Plate 09	B08	0.446425	0.441625	-0.0048
orf19.351	4003		Plate 09	B09	0.4235	0.422	-0.00150001
orf19.2782	3779		Plate 09	B10	0.456575	0.477925	0.02135
orf19.3557	4182	GPI19	Plate 09	B11	0.437775	0.442225	0.00444999
orf19.3785	4239		Plate 09	B12	0.481725	0.487775	0.00605001
orf19.2266	4265		Plate 09	C01	0.50255	0.484175	-0.018375
orf19.1634	4269		Plate 09	C02	0.40385	0.444125	0.040275
orf19.4195	4277		Plate 09	C03	0.41165	0.431075	0.019425
orf19.3697	4278		Plate 09	C04	0.417125	0.39255	-0.024575
orf19.7568	4283		Plate 09	C05	0.415325	0.402675	-0.01265
orf19.719	4291		Plate 09	C06	0.401625	0.4432	0.041575
orf19.7386	4305		Plate 09	C07	0.422625	0.441075	0.01845
orf19.720	4310	GST3	Plate 09	C08	0.421625	0.3904	-0.031225
orf19.7598	4320		Plate 09	C09	0.453175	0.418675	-0.0345
orf19.3589	4321	SPO11	Plate 09	C10	0.347	0.427525	0.080525
orf19.2439	4327		Plate 09	C11	0.43535	0.4082	-0.02715
orf19.4766	3795	ARG81	Plate 09	C12	0.474775	0.46965	-0.00512499
orf19.6756	4184		Plate 09	D01	0.493625	0.521075	0.02745
orf19.5078	4284		Plate 09	D02	0.4349	0.424975	-0.009925
orf19.6508	4331		Plate 09	D03	0.416125	0.4075	-0.00862499
orf19.5772	1041		Plate 09	D04	0.337425	0.42775	0.090325
orf19.4725	1167	SWI6	Plate 09	D05	0.4426	0.423	-0.0196
orf19.4242	1174	CST20	Plate 09	D06	0.424825	0.421225	-0.00360001
orf19.1490	1183	MSB2	Plate 09	D07	0.432025	0.407575	-0.02445
orf19.6801	1185	RPD31	Plate 09	D08	0.426725	0.418575	-0.00815
orf19.1792	1186		Plate 09	D09	0.44165	0.39855	-0.0431
orf19.171	1187	DBP2	Plate 09	D10	0.419425	0.358175	-0.06125
orf19.5447	1191	HGT19	Plate 09	D11	0.38	0.45575	0.07575
orf19.3642	1199	SUN41	Plate 09	D12	0.309525	0.361	0.051475
orf19.814	1534	SSY1	Plate 09	E01	0.537225	0.4006	-0.136625
orf19.7433	1548		Plate 09	E02	0.4289	0.45565	0.02675
orf19.5664	4198	HOF1	Plate 09	E03	0.4178	0.355	-0.0628
orf19.4013	4255		Plate 09	E04	0.42225	0.433075	0.010825
orf19.5680	4332		Plate 09	E05	0.42325	0.427975	0.004725
orf19.5885	378		Plate 09	E06	0.461	0.0121	-0.4489
orf19.4373	316		Plate 09	E07	0.42215	0.333675	-0.088475
orf19.5085	544		Plate 09	E08	0.430025	0.33315	-0.096875
orf19.2736	387	HFL2	Plate 09	E09	0.4428	0.352025	-0.090775
orf19.4374	639	PRP42	Plate 09	E10	0.4423	0.044625	-0.397675
orf19.5378	416	SCL1	Plate 09	E11	0.45205	0.0354	-0.41665
orf19.2275	420		Plate 09	E12	0.49305	0.419075	-0.073975
orf19.5963	137		Plate 09	F01	0.507375	0.362025	-0.14535
orf19.3856	273	CDC28	Plate 09	F02	0.36305	0.06285	-0.3002
orf19.5383	415	PMA1	Plate 09	F03	0.441225	0.17685	-0.264375
orf19.2571	390	SEC4	Plate 09	F04	0.3726	0.043675	-0.328925
orf19.4620	269	TIM12	Plate 09	F05	0.39845	0.34675	-0.0517
orf19.202	276	CDC47	Plate 09	F06	0.4119	0.38575	-0.02615
orf19.3211	739	RCF3	Plate 09	F07	0.4258	0.397925	-0.027875
orf19.5833	736		Plate 09	F08	0.4383	0.2358	-0.2025
orf19.2885	733	PRI2	Plate 09	F09	0.4091	0.090425	-0.318675
orf19.4732	732	SEC24	Plate 09	F10	0.290025	0.0075	-0.282525
orf19.1771	738		Plate 09	F11	0.450225	0.440775	-0.00945
orf19.488	737	MEX67	Plate 09	F12	0.49135	0.0462	-0.44515
orf19.7293	635	MPS1	Plate 09	G01	0.4321	0.019225	-0.412875
orf19.3888	274	PGI1	Plate 09	G02	0.408375	0.1006	-0.307775
orf19.6135.1	527	SMX4	Plate 09	G03	0.430625	0.346575	-0.08405
orf19.3300	431	ZPR1	Plate 09	G04	0.45115	0.473025	0.021875
orf19.6776	661	GCD2	Plate 09	G05	0.456925	0.309025	-0.1479
orf19.900	672	NSP1	Plate 09	G06	0.463325	0.252325	-0.211
orf19.969	679		Plate 09	G07	0.46735	0.257825	-0.209525
orf19.964	682	SMC4	Plate 09	G08	0.430475	0.080625	-0.34985
orf19.796	680	HYM1	Plate 09	G09	0.4561	0.358425	-0.097675
orf19.6909	694		Plate 09	G10	0.465725	0.07435	-0.391375
orf19.3962	698	HAS1	Plate 09	G11	0.4803	0.088225	-0.392075
orf19.337	334		Plate 09	G12	0.5116	0.2844	-0.2272
orf19.2307	705		Plate 09	H01	0.517225	0.236275	-0.28095
orf19.1402	458	CCT2	Plate 09	H02	0.523225	0.01975	-0.503475
orf19.6861	713		Plate 09	H03	0.519025	0.503225	-0.0158
orf19.6598	710	WAL1	Plate 09	H04	0.4616	0.465825	0.004225
orf19.5846	594		Plate 09	H05	0.42315	0.22265	-0.2005
orf19.4033	644	PRP22	Plate 09	H06	0.508325	0.513575	0.00524998
orf19.3478	597	NIP7	Plate 09	H07	0.51805	0.204825	-0.313225
orf19.5732	706	NOG2	Plate 09	H08	0.4589	0.09045	-0.36845
orf19.6539	598		Plate 09	H09	0.422025	0.0892	-0.332825
orf19.3031	592	SEC62	Plate 09	H10	0.503775	0.339975	-0.1638
orf19.2528	700		Plate 09	H11	0.522375	0.2092	-0.313175
orf19.3623	650	SMC2	Plate 09	H12	0.58165	0.14615	-0.4355
orf19.4542	601		Plate 10	A01	0.5099	0.5256	0.0157
orf19.2643	616	RPO26	Plate 10	A02	0.513925	0.055225	-0.4587
orf19.7256	646		Plate 10	A03	0.5006	0.539025	0.038425
orf19.6931	714		Plate 10	A04	0.508	0.21965	-0.28835
orf19.6234	702		Plate 10	A05	0.448425	0.49465	0.046225
orf19.2843	45	RHO1	Plate 10	A06	0.415975	0.009325	-0.40665
orf19.4120	24	LAS1	Plate 10	A07	0.434325	0.293475	-0.14085
orf19.922	46	ERG11	Plate 10	A08	0.374125	0.0977	-0.276425
orf19.2609	54	CET1	Plate 10	A09	0.5522	0.2901	-0.2621
orf19.2560	55	CDC60	Plate 10	A10	0.479225	0.032525	-0.4467
orf19.5692	63		Plate 10	A11	0.52215	0.33535	-0.1868
orf19.708	70		Plate 10	A12	0.485625	0.066275	-0.41935
orf19.7141	68	UFE1	Plate 10	B01	0.478325	0.139075	-0.33925
orf19.5166	65	DBF4	Plate 10	B02	0.4459	0.407425	-0.038475
orf19.7492	66	SWC4	Plate 10	B03	0.45435	0.28615	-0.1682
orf19.5884	15		Plate 10	B04	0.471675	0.320875	-0.1508
orf19.1434	2		Plate 10	B05	0.429825	0.45715	0.027325
orf19.4443	36	YPD1	Plate 10	B06	0.438975	0.4014	-0.037575
orf19.2831	4	RPC31	Plate 10	B07	0.402475	0.01575	-0.386725
orf19.7620	14		Plate 10	B08	0.486125	0.4136	-0.072525
orf19.1569	16	UTP22	Plate 10	B09	0.497125	0.385625	-0.1115
orf19.3724	26		Plate 10	B10	0.408925	0.3547	-0.054225
orf19.801	39	TBF1	Plate 10	B11	0.41855	0.259075	-0.159475
orf19.677	40	CHO1	Plate 10	B12	0.460925	0.4792	0.018275
orf19.6489	41	FMP45	Plate 10	C01	0.45825	0.493675	0.035425
orf19.1945	42	AUR1	Plate 10	C02	0.4917	0.336975	-0.154725
orf19.29	43		Plate 10	C03	0.44825	0.420825	-0.027425
orf19.4566	44		Plate 10	C04	0.3926	0.433675	0.041075
orf19.5363	13		Plate 10	C05	0.442475	0.32615	-0.116325
orf19.4161	1		Plate 10	C06	0.37975	0.395775	0.016025
orf19.2187	58	ALG7	Plate 10	C07	0.365525	0.22375	-0.141775
orf19.7308	57	TUB1	Plate 10	C08	0.351725	0.083375	-0.26835
orf19.7599	33	UTP5	Plate 10	C09	0.428275	0.290325	-0.13795
orf19.4849	30		Plate 10	C10	0.46925	0.4107	-0.05855
orf19.6341	21		Plate 10	C11	0.48065	0.445175	-0.035475
orf19.4601	20		Plate 10	C12	0.4675	0.524175	0.056675
orf19.1776	35		Plate 10	D01	0.4274	0.52655	0.09915
orf19.6346	10		Plate 10	D02	0.493775	0.4956	0.00182501
orf19.579	7	FOL1	Plate 10	D03	0.037475	0.00525	-0.032225
orf19.7019	27	YML6	Plate 10	D04	0.478725	0.26685	-0.211875
orf19.6880	37		Plate 10	D05	0.4015	0.3075	-0.094
orf19.5526	29	SEC20	Plate 10	D06	0.450325	0.25675	-0.193575
orf19.379	18		Plate 10	D07	0.378675	0.421	0.042325
orf19.2717	38	SAS10	Plate 10	D08	0.381375	0.270325	-0.11105
orf19.6821	3		Plate 10	D09	0.476475	0.394925	-0.08155
orf19.7361	5		Plate 10	D10	0.55225	0.386475	-0.165775
orf19.1136	478		Plate 10	D11	0.537425	0.430775	-0.10665
orf19.5242	473	CDC6	Plate 10	D12	0.505875	0.10515	-0.400725
orf19.3960	474	HYS2	Plate 10	E01	0.523425	0.40795	-0.115475
orf19.5196	476	ESS1	Plate 10	E02	0.432475	0.421225	-0.01125
orf19.4030	460		Plate 10	E03	0.506775	0.05735	-0.449425
orf19.6881	608	YTH1	Plate 10	E04	0.41025	0.179825	-0.230425
orf19.5027	407	LCB2	Plate 10	E05	0.4315	0.277075	-0.154425
orf19.2775	593	IDI1	Plate 10	E06	0.4273	0.398375	-0.028925
orf19.3027	603		Plate 10	E07	0.440325	0.279575	-0.16075
orf19.1137	477		Plate 10	E08	0.464275	0.42105	-0.043225
orf19.2288	479	CCT5	Plate 10	E09	0.452825	0.109275	-0.34355
orf19.2289	480	ARP3	Plate 10	E10	0.541625	0.11465	-0.426975
orf19.4817	484	RAM2	Plate 10	E11	0.4314	0.306725	-0.124675
orf19.4223	410	GCD11	Plate 10	E12	0.4802	0.193525	-0.286675
orf19.6702	437	DED81	Plate 10	F01	0.509825	0.2082	-0.301625
orf19.6701	438		Plate 10	F02	0.4292	0.22765	-0.20155
orf19.1029	440		Plate 10	F03	0.5069	0.424975	-0.081925
orf19.1626	441		Plate 10	F04	0.409675	0.458475	0.0488
orf19.1570	443	ERG7	Plate 10	F05	0.425225	0.18965	-0.235575
orf19.596.1	444	NOP10	Plate 10	F06	0.4029	0.136575	-0.266325
orf19.6455	446		Plate 10	F07	0.42695	0.437575	0.010625
orf19.7488	448		Plate 10	F08	0.451	0.1737	-0.2773
orf19.4625	486	TOA2	Plate 10	F09	0.485675	0.2694	-0.216275
orf19.1618	488	GFA1	Plate 10	F10	0.4371	0.019675	-0.417425
orf19.443	489		Plate 10	F11	0.4627	0.469675	0.006975
orf19.441	490	RPT1	Plate 10	F12	0.48065	0.03775	-0.4429
orf19.4492	491		Plate 10	G01	0.51545	0.192625	-0.322825
orf19.2974	492	YKT6	Plate 10	G02	0.424575	0.26175	-0.162825
orf19.7438	493	UBA1	Plate 10	G03	0.4746	0.322775	-0.151825
orf19.5425	494		Plate 10	G04	0.4331	0.4594	0.0263
orf19.2818	495		Plate 10	G05	0.43865	0.426375	-0.012275
orf19.3867	546	RPL7	Plate 10	G06	0.372275	0.1956	-0.176675
orf19.3862	547		Plate 10	G07	0.4225	0.420075	-0.002425
orf19.3861	548	SIS1	Plate 10	G08	0.4193	0.418625	-0.000675
orf19.501	549		Plate 10	G09	0.31615	0.02845	-0.2877
orf19.5873	550	POL1	Plate 10	G10	0.492125	0.032975	-0.45915
orf19.172	551	RPC19	Plate 10	G11	0.502325	0.226975	-0.27535
orf19.6312	552	RPS3	Plate 10	G12	0.498525	0.0177	-0.480825
orf19.5682	553		Plate 10	H01	0.49815	0.0463	-0.45185
orf19.1280	554	SUI1	Plate 10	H02	0.524275	0.0838	-0.440475
orf19.5835	129		Plate 10	H03	0.507075	0.190525	-0.31655
orf19.3898	130		Plate 10	H04	0.497025	0.453175	-0.04385
orf19.512	136		Plate 10	H05	0.44135	0.355225	-0.086125
orf19.7154	139	UTP18	Plate 10	H06	0.521225	0.26585	-0.255375
orf19.7358	140	SAM50	Plate 10	H07	0.3788	0.4616	0.0828
orf19.1026	142		Plate 10	H08	0.516475	0.110075	-0.4064
orf19.7631	138	SLD5	Plate 10	H09	0.3948	0.382175	-0.012625
orf19.5444	95	TIM44	Plate 10	H10	0.534125	0.233225	-0.3009
orf19.2179	98	SIT1	Plate 10	H11	0.518325	0.455525	-0.0628
orf19.1878	194	MED4	Plate 10	H12	0.5324	0.49985	-0.03255
orf19.1574	197		Plate 11	A01	0.531525	0.314625	-0.2169
orf19.5198	198	NOP4	Plate 11	A02	0.48845	0.462225	-0.026225
orf19.5168	200		Plate 11	A03	0.511175	0.539	0.027825
orf19.5722	202		Plate 11	A04	0.5132	0.513425	0.000224985
orf19.7285	203		Plate 11	A05	0.50025	0.11685	-0.3834
orf19.5008.1	101	DAD1	Plate 11	A06	0.497325	0.146525	-0.3508
orf19.4133	117		Plate 11	A07	0.495075	0.54165	0.046575
orf19.3970	62		Plate 11	A08	0.47905	0.432025	-0.047025
orf19.2325	108		Plate 11	A09	0.47715	0.5106	0.03345
orf19.3333	74		Plate 11	A10	0.48335	0.5221	0.03875
orf19.5850	97	NOC2	Plate 11	A11	0.396025	0.05385	-0.342175
orf19.88	109	ILV5	Plate 11	A12	0.4207	0.34625	-0.07445
orf19.2389	113		Plate 11	B01	0.4446	0.466925	0.022325
orf19.6373	116	DCP2	Plate 11	B02	0.43345	0.285525	-0.147925
orf19.6648	146	SDA1	Plate 11	B03	0.4532	0.464025	0.010825
orf19.3553	150	RPF2	Plate 11	B04	0.464475	0.258675	-0.2058
orf19.7197	174		Plate 11	B05	0.464675	0.194875	-0.2698
orf19.4203	179		Plate 11	B06	0.4389	0.53585	0.09695
orf19.410.3	128		Plate 11	B07	0.46395	0.462375	-0.001575
orf19.3334	617	RPS21	Plate 11	B08	0.3879	0.015075	-0.372825
orf19.1901	643	MCM3	Plate 11	B09	0.45535	0.128775	-0.326575
orf19.567	641	TFB3	Plate 11	B10	0.4167	0.02455	-0.39215
orf19.7286	609	RPN7	Plate 11	B11	0.4276	0.034525	-0.393075
orf19.3564	610	RPC40	Plate 11	B12	0.431525	0.053925	-0.3776
orf19.3647	604	SEC8	Plate 11	C01	0.4385	0.4478	0.00929999
orf19.670	642	SMT3	Plate 11	C02	0.4192	0.480475	0.061275
orf19.2425.2	654	RPL28	Plate 11	C03	0.42205	0.1021	-0.31995
orf19.336	599	YAH1	Plate 11	C04	0.42965	0.372825	-0.056825
orf19.6437	451	CDC23	Plate 11	C05	0.407025	0.27345	-0.133575
orf19.5073	614	DPM1	Plate 11	C06	0.4152	0.40655	-0.00865
orf19.7563	612	BET2	Plate 11	C07	0.402525	0.339825	-0.0627
orf19.4125	615		Plate 11	C08	0.433625	0.47245	0.038825
orf19.407	408	GCD6	Plate 11	C09	0.408525	0.375525	-0.033
orf19.7449	187		Plate 11	C10	0.4103	0.43785	0.02755
orf19.7569	515	SIK1	Plate 11	C11	0.393525	0.036875	-0.35665
orf19.4268	517	UTP13	Plate 11	C12	0.44715	0.174975	-0.272175
orf19.7673	660		Plate 11	D01	0.4823	0.03775	-0.44455
orf19.3013	665	CDC12	Plate 11	D02	0.457875	0.28425	-0.173625
orf19.3990	669		Plate 11	D03	0.432975	0.496625	0.06365
orf19.1896	673	SSC1	Plate 11	D04	0.421025	0.161975	-0.25905
orf19.4363	687	SGD1	Plate 11	D05	0.407	0.374025	-0.032975
orf19.6369	91	RIO2	Plate 11	D06	0.407625	0.415525	0.00790001
orf19.640	229		Plate 11	D07	0.39845	0.465	0.06655
orf19.4659	238		Plate 11	D08	0.428025	0.164375	-0.26365
orf19.4499	245	RIM2	Plate 11	D09	0.3979	0.409125	0.011225
orf19.1352	250	TIM22	Plate 11	D10	0.4034	0.29045	-0.11295
orf19.2362	75		Plate 11	D11	0.474425	0.345	-0.129425
orf19.2825	77		Plate 11	D12	0.482425	0.471575	-0.01085
orf19.5066	79		Plate 11	E01	0.454075	0.502625	0.04855
orf19.6903	80		Plate 11	E02	0.402975	0.3809	-0.022075
orf19.2519	81		Plate 11	E03	0.384075	0.413375	0.0293
orf19.7072	82	PEL1	Plate 11	E04	0.388925	0.435175	0.04625
orf19.3551	84	DAD2	Plate 11	E05	0.4034	0.04875	-0.35465
orf19.4931	555		Plate 11	E06	0.4053	0.119725	-0.285575
orf19.7343	726		Plate 11	E07	0.4021	0.393475	-0.008625
orf19.2287	622	RPA12	Plate 11	E08	0.38585	0.13285	-0.253
orf19.7548	730	MED21	Plate 11	E09	0.394275	0.4512	0.056925
orf19.3250	483		Plate 11	E10	0.40575	0.368075	-0.037675
orf19.2557	627	SEC65	Plate 11	E11	0.3949	0.32885	-0.06605
orf19.6463	481		Plate 11	E12	0.489325	0.462525	-0.0268
orf19.6479	637	SEC1	Plate 11	F01	0.0215	0.0115	-0.01
orf19.5887	621	NUP85	Plate 11	F02	0.40755	0.35255	-0.055
orf19.7312	533	ERG13	Plate 11	F03	0.4206	0.243575	-0.177025
orf19.1886	560	RCL1	Plate 11	F04	0.438425	0.335275	-0.10315
orf19.7658	561	RFC4	Plate 11	F05	0.396825	0.403925	0.0071
orf19.7626	562	EIF4E	Plate 11	F06	0.4025	0.432175	0.029675
orf19.4681	563	RAT1	Plate 11	F07	0.4128	0.286875	-0.125925
orf19.6955	564	HBR3	Plate 11	F08	0.436125	0.194375	-0.24175
orf19.1601	565	RPL3	Plate 11	F09	0.3777	0.40725	0.02955
orf19.3817	566		Plate 11	F10	0.397625	0.4597	0.062075
orf19.1761	567		Plate 11	F11	0.431375	0.229925	-0.20145
orf19.3103	568		Plate 11	F12	0.480675	0.031375	-0.4493
orf19.3123	569	RPT5	Plate 11	G01	0.46325	0.156675	-0.306575
orf19.3349	570		Plate 11	G02	0.42285	0.347675	-0.075175
orf19.7605	571	PUP1	Plate 11	G03	0.388675	0.06605	-0.322625
orf19.4205.1	572		Plate 11	G04	0.427	0.019725	-0.407275
orf19.2682	574		Plate 11	G05	0.440225	0.3665	-0.073725
orf19.5847	575		Plate 11	G06	0.418175	0.32345	-0.094725
orf19.2687.1	576		Plate 11	G07	0.428775	0.059625	-0.36915
orf19.6891	577	RFC1	Plate 11	G08	0.411975	0.38905	-0.022925
orf19.6314	578	RPB8	Plate 11	G09	0.4201	0.119275	-0.300825
orf19.2524	579	MGE1	Plate 11	G10	0.397825	0.36475	-0.033075
orf19.482	580	RPT4	Plate 11	G11	0.4374	0.044275	-0.393125
orf19.5351	542	TIF11	Plate 11	G12	0.414175	0.019725	-0.39445
orf19.7050	701	NOP15	Plate 11	H01	0.512225	0.3719	-0.140325
orf19.3060	76		Plate 11	H02	0.489575	0.473375	-0.0162
orf19.6742	83		Plate 11	H03	0.4772	0.510425	0.033225
orf19.6233	86		Plate 11	H04	0.521725	0.39825	-0.123475
orf19.2367	87		Plate 11	H05	0.507775	0.517	0.00922501
orf19.6884	88	GWT1	Plate 11	H06	0.48005	0.45175	-0.0283
orf19.6917	93		Plate 11	H07	0.46155	0.520325	0.058775
orf19.4168	99		Plate 11	H08	0.461	0.340175	-0.120825
orf19.5268	152	MED10	Plate 11	H09	0.49155	0.480475	-0.011075
orf19.6512	64	EXO70	Plate 11	H10	0.509675	0.485275	-0.0244
orf19.700	102	SEO1	Plate 11	H11	0.490675	0.515	0.024325
orf19.688	103		Plate 11	H12	0.5084	0.3034	-0.205
orf19.2735	110	SEN2	Plate 12	A01	0.50065	0.325125	-0.175525
orf19.5346	115		Plate 12	A02	0.478525	0.161575	-0.31695
orf19.5551	211	MIF2	Plate 12	A03	0.43755	0.13585	-0.3017
orf19.6923	222		Plate 12	A04	0.508675	0.476225	-0.03245
orf19.832	220	GPI13	Plate 12	A05	0.4247	0.43735	0.01265
orf19.124	218	CIC1	Plate 12	A06	0.499275	0.46875	-0.030525
orf19.4626	212		Plate 12	A07	0.4578	0.473125	0.015325
orf19.1386	223		Plate 12	A08	0.503425	0.084875	-0.41855
orf19.5039	217		Plate 12	A09	0.482425	0.299425	-0.183
orf19.7624	214		Plate 12	A10	0.4506	0.481425	0.030825
orf19.1941	201	NUF2	Plate 12	A11	0.4578	0.443025	-0.014775
orf19.7634	204	MCD1	Plate 12	A12	0.383325	0.04375	-0.339575
orf19.1361	230	TIM23	Plate 12	B01	0.44305	0.236775	-0.206275
orf19.491	231		Plate 12	B02	0.3826	0.017375	-0.365225
orf19.793	232	CAK1	Plate 12	B03	0.38035	0.4288	0.04845
orf19.4353	234	ULP2	Plate 12	B04	0.38355	0.5239	0.14035
orf19.2267	235	RFA2	Plate 12	B05	0.392275	0.1531	-0.239175
orf19.6052	236	CNS1	Plate 12	B06	0.44145	0.459175	0.017725
orf19.3831	237		Plate 12	B07	0.495025	0.5182	0.023175
orf19.474	6		Plate 12	B08	0.397075	0.22075	-0.176325
orf19.423	9		Plate 12	B09	0.396425	0.29775	-0.098675
orf19.2715	195	RPC53	Plate 12	B10	0.39705	0.5128	0.11575
orf19.4190	154	PAM18	Plate 12	B11	0.404125	0.178025	-0.2261
orf19.3304	155		Plate 12	B12	0.4307	0.065975	-0.364725
orf19.910	159		Plate 12	C01	0.44245	0.341925	-0.100525
orf19.7615	157		Plate 12	C02	0.37235	0.28205	-0.0903
orf19.1622	168	YCG1	Plate 12	C03	0.420075	0.397125	-0.02295
orf19.544	162		Plate 12	C04	0.3724	0.343475	-0.028925
orf19.3531	163		Plate 12	C05	0.379225	0.4216	0.042375
orf19.232	165		Plate 12	C06	0.424625	0.56445	0.139825
orf19.6544	177	LPI9	Plate 12	C07	0.381	0.412725	0.031725
orf19.24	2476	RTA2	Plate 12	C08	0.399075	0.396075	-0.00299999
orf19.1152	3394		Plate 12	C09	0.3849	0.43075	0.04585
orf19.2246	2036		Plate 12	C10	0.380225	0.418275	0.03805
orf19.6477	3403		Plate 12	C11	0.3779	0.416425	0.038525
orf19.4026	2104	HIS1	Plate 12	C12	0.46295	0.477975	0.015025
orf19.4884	2365	WOR1	Plate 12	D01	0.416325	0.477225	0.0609
orf19.3810	2116		Plate 12	D02	0.368225	0.400675	0.03245
orf19.7412	2252	MUB1	Plate 12	D03	0.3743	0.46355	0.08925
orf19.2581	3422		Plate 12	D04	0.365575	0.39595	0.030375
orf19.5665	2555		Plate 12	D05	0.376325	0.40045	0.024125
orf19.1366	2455		Plate 12	D06	0.41705	0.4188	0.00175001
orf19.3763	3410		Plate 12	D07	0.354425	0.39425	0.039825
orf19.6995	3464	ATO6	Plate 12	D08	0.383425	0.38595	0.00252501
orf19.2137	3427		Plate 12	D09	0.384575	0.398275	0.0137
orf19.942	2205	KRE62	Plate 12	D10	0.373275	0.406775	0.0335
orf19.4846	2097		Plate 12	D11	0.378925	0.41715	0.038225
orf19.3938	3390		Plate 12	D12	0.442925	0.3542	-0.088725
orf19.2065	2114		Plate 12	E01	0.40775	0.45695	0.0492
orf19.1805	3378	PEX14	Plate 12	E02	0.35815	0.4025	0.04435
orf19.4524	3397	ZCF24	Plate 12	E03	0.3519	0.4004	0.0485
orf19.2666	3385	MSN5	Plate 12	E04	0.36405	0.4231	0.05905
orf19.1793	3414		Plate 12	E05	0.36765	0.4208	0.05315
orf19.1375	1856	LEU42	Plate 12	E06	0.4433	0.40175	-0.04155
orf19.4898	1865		Plate 12	E07	0.360875	0.39395	0.033075
orf19.2115	1912		Plate 12	E08	0.00055	0.003925	0.003375
orf19.2810	1889	AAP1	Plate 12	E09	0.354375	0.4033	0.048925
orf19.2214	1866		Plate 12	E10	0.362825	0.300525	-0.0623
orf19.6068	3249	SVF1	Plate 12	E11	0.353725	0.39625	0.042525
orf19.1523	2696	FMO1	Plate 12	E12	0.411525	0.475025	0.0635
orf19.4614	3277		Plate 12	F01	0.436425	0.454075	0.01765
orf19.2241	2689	PST1	Plate 12	F02	0.37975	0.3953	0.01555
orf19.153	2670	TPO5	Plate 12	F03	0.343175	0.3592	0.016025
orf19.1442	2676	PLB4.5	Plate 12	F04	0.42295	0.382225	-0.040725
orf19.3247	3476		Plate 12	F05	0.35565	0.3939	0.03825
orf19.318	2663		Plate 12	F06	0.353375	0.4056	0.052225
orf19.3051	3468		Plate 12	F07	0.44585	0.3949	-0.05095
orf19.2458	2660	SIP5	Plate 12	F08	0.349675	0.35895	0.009275
orf19.3023	3263	NGG1	Plate 12	F09	0.377925	0.3737	-0.004225
orf19.4003	3455	TIP20	Plate 12	F10	0.3516	0.05835	-0.29325
orf19.3923	2677	PGA37	Plate 12	F11	0.36265	0.3995	0.03685
orf19.5498	3420	EFH1	Plate 12	F12	0.399125	0.416025	0.0169
orf19.1991	2702		Plate 12	G01	0.456175	0.4666	0.010425
orf19.805	3393		Plate 12	G02	0.3844	0.40065	0.01625
orf19.4520	3424		Plate 12	G03	0.442375	0.38655	-0.055825
orf19.4850	3454		Plate 12	G04	0.36925	0.3993	0.03005
orf19.2217	3413		Plate 12	G05	0.375475	0.395425	0.01995
orf19.6348	3432		Plate 12	G06	0.3917	0.442825	0.051125
orf19.3302	3451		Plate 12	G07	0.383725	0.4254	0.041675
orf19.511	3449		Plate 12	G08	0.371475	0.389025	0.01755
orf19.7033	3470		Plate 12	G09	0.349975	0.407275	0.0573
orf19.3669	3438	SHA3	Plate 12	G10	0.403075	0.4014	-0.001675
orf19.6744	3480		Plate 12	G11	0.35845	0.42795	0.0695
orf19.6705	3442		Plate 12	G12	0.42855	0.424025	-0.00452499
orf19.4923	3434		Plate 12	H01	0.46465	0.475075	0.010425
orf19.1585	1968	ZRT2	Plate 12	H02	0.416225	0.4485	0.032275
orf19.2209	1794	YVC1	Plate 12	H03	0.450225	0.455675	0.00545
orf19.473	1523	TPO4	Plate 12	H04	0.488975	0.4564	-0.032575
orf19.3003	1961		Plate 12	H05	0.457475	0.4786	0.021125
orf19.3950	1687	MSM1	Plate 12	H06	0.46975	0.48955	0.0198
orf19.2445	1801		Plate 12	H07	0.470875	0.4455	-0.025375
orf19.2350	1524		Plate 12	H08	0.440675	0.476275	0.0356
orf19.5815	1839	SCT2	Plate 12	H09	0.4543	0.45935	0.00505
orf19.3083	71		Plate 12	H10	0.454625	0.43235	-0.022275
orf19.4612	899		Plate 12	H11	0.43165	0.474875	0.043225
orf19.6081	3096	PHR2	Plate 12	H12	0.485625	0.504875	0.01925
orf19.2003	3114	HNM1	Plate 13	A01	0.442425	0.358725	-0.0837
orf19.339	3218	NDE1	Plate 13	A02	0.45025	0.421525	-0.028725
orf19.986	2726	GLY1	Plate 13	A03	0.435125	0.4131	-0.022025
orf19.3895	2781	CHT2	Plate 13	A04	0.416425	0.43955	0.023125
orf19.2908	3067		Plate 13	A05	0.381525	0.44145	0.059925
orf19.5676	3444		Plate 13	A06	0.4061	0.45645	0.05035
orf19.7128	3471	SYS1	Plate 13	A07	0.43675	0.444525	0.00777499
orf19.2175	2488		Plate 13	A08	0.74375	0.4434	-0.30035
orf19.3991	2103		Plate 13	A09	0.495475	0.690375	0.1949
orf19.3099	3194	TRP4	Plate 13	A10	0.392775	0.535575	0.1428
orf19.7310	3308		Plate 13	A11	0.4254	0.410725	-0.014675
orf19.5796	3147	SHE9	Plate 13	A12	0.42805	0.443775	0.015725
orf19.2575	3421		Plate 13	B01	0.410675	0.455775	0.0451
orf19.7661	3481	HMI1	Plate 13	B02	0.4013	0.415025	0.013725
orf19.3441	3437	FRP6	Plate 13	B03	0.4443	0.4317	-0.0126
orf19.989	3433		Plate 13	B04	0.383075	0.40165	0.018575
orf19.673	3141		Plate 13	B05	0.382325	0.42235	0.040025
orf19.3111	3192	PRA1	Plate 13	B06	0.374575	0.409775	0.0352
orf19.6809	3337		Plate 13	B07	0.380375	0.413825	0.03345
orf19.5757	3379		Plate 13	B08	0.385375	0.4107	0.025325
orf19.4678	2461		Plate 13	B09	0.43515	0.452575	0.017425
orf19.5459	3332		Plate 13	B10	0.385625	0.43725	0.051625
orf19.5755	1605		Plate 13	B11	0.3867	0.400475	0.013775
orf19.2446	1642		Plate 13	B12	0.3819	0.4247	0.0428
orf19.1220	1747	RVS167	Plate 13	C01	0.3947	0.412975	0.018275
orf19.689	1811	PLB1	Plate 13	C02	0.48255	0.4181	-0.06445
orf19.341	2082		Plate 13	C03	0.39785	0.418875	0.021025
orf19.6993	2144	GAP2	Plate 13	C04	0.400675	0.41795	0.017275
orf19.1388	2758		Plate 13	C05	0.393325	0.454325	0.061
orf19.166	2710	ASG1	Plate 13	C06	0.392275	0.41805	0.025775
orf19.681	2738	HAP43	Plate 13	C07	0.4014	0.397975	-0.00342499
orf19.3355	2779	ISN1	Plate 13	C08	0.4362	0.415	-0.0212
orf19.2284	2773		Plate 13	C09	0.378775	0.42395	0.045175
orf19.3348	2772		Plate 13	C10	0.3676	0.2871	-0.0805
orf19.2574	1900		Plate 13	C11	0.4079	0.42755	0.01965
orf19.4699	1625		Plate 13	C12	0.41445	0.44835	0.0339
orf19.2016	1660		Plate 13	D01	0.39835	0.407125	0.008775
orf19.3607	1692		Plate 13	D02	0.450725	0.3968	-0.053925
orf19.3795	1746	AGP3	Plate 13	D03	0.407775	0.411	0.00322501
orf19.5535	1093		Plate 13	D04	0.386175	0.4362	0.050025
orf19.6719	2549		Plate 13	D05	0.37735	0.403925	0.026575
orf19.541	2541		Plate 13	D06	0.39505	0.415425	0.020375
orf19.7403	2634		Plate 13	D07	0.3942	0.3921	-0.0021
orf19.5026	2168		Plate 13	D08	0.55385	0.413975	-0.139875
orf19.5292	2393	AXL2	Plate 13	D09	0.410425	0.4114	0.00097499
orf19.7518	2644	ZCF38	Plate 13	D10	0.408975	0.42425	0.015275
orf19.7364	2629		Plate 13	D11	0.414225	0.4298	0.015575
orf19.5839	2490	PDR17	Plate 13	D12	0.41205	0.501825	0.089775
orf19.7370	2241		Plate 13	E01	0.409375	0.426575	0.0172
orf19.4471	2413		Plate 13	E02	0.475175	0.4566	-0.018575
orf19.5970	2655		Plate 13	E03	0.42935	0.4212	-0.00814998
orf19.1445	2069	ESC4	Plate 13	E04	0.4114	0.393375	-0.018025
orf19.7377	2631	ASE1	Plate 13	E05	0.398575	0.37415	-0.024425
orf19.2045	2046		Plate 13	E06	0.387875	0.363325	-0.02455
orf19.6444	2597		Plate 13	E07	0.37655	0.4237	0.04715
orf19.5837	2492		Plate 13	E08	0.382725	0.4129	0.030175
orf19.6882	2072	OSM1	Plate 13	E09	0.3801	0.35465	-0.02545
orf19.6899	2576		Plate 13	E10	0.35065	0.431725	0.081075
orf19.644	1710	HGT9	Plate 13	E11	0.3996	0.47035	0.07075
orf19.3759	2351		Plate 13	E12	0.432	0.48395	0.05195
orf19.2875	2419		Plate 13	F01	0.41825	0.4713	0.05305
orf19.3150	2341	GRE2	Plate 13	F02	0.382625	0.39605	0.013425
orf19.2983	2469	CDC73	Plate 13	F03	0.382475	0.429675	0.0472
orf19.4396	2666		Plate 13	F04	0.378475	0.40655	0.028075
orf19.7495	2642		Plate 13	F05	0.375725	0.38115	0.005425
orf19.7437	2637		Plate 13	F06	0.391675	0.416525	0.02485
orf19.4617	2161		Plate 13	F07	0.3933	0.4059	0.0126
orf19.778	2682	PIL1	Plate 13	F08	0.381725	0.4201	0.038375
orf19.2055	2115	NPL6	Plate 13	F09	0.37825	0.432675	0.054425
orf19.5426	2260		Plate 13	F10	0.40465	0.430875	0.026225
orf19.3066	2151	ENG1	Plate 13	F11	0.3893	0.4192	0.0299
orf19.367	2755	CNH1	Plate 13	F12	0.471125	0.449475	-0.02165
orf19.4833	2100	MLS1	Plate 13	G01	0.4414	0.417275	-0.024125
orf19.2072	2112		Plate 13	G02	0.40215	0.4141	0.01195
orf19.1980	2793	GIT4	Plate 13	G03	0.390725	0.441875	0.05115
orf19.1979	2794	GIT3	Plate 13	G04	0.41415	0.432025	0.017875
orf19.4781	2712	GRP1	Plate 13	G05	0.381875	0.437525	0.05565
orf19.988	2727		Plate 13	G06	0.333175	0.4184	0.085225
orf19.3149	2728	LSP1	Plate 13	G07	0.395075	0.4309	0.035825
orf19.2019	2761		Plate 13	G08	0.37805	0.220375	-0.157675
orf19.3352	2780		Plate 13	G09	0.38435	0.43565	0.0513
orf19.2113	2432		Plate 13	G10	0.413725	0.4086	-0.00512499
orf19.5205	2377		Plate 13	G11	0.44625	0.43805	-0.00820001
orf19.4584	2600	PHO114	Plate 13	G12	0.442925	0.46355	0.020625
orf19.3926	2399	RNY11	Plate 13	H01	0.510325	0.452725	-0.0576
orf19.5663	2554	RCH1	Plate 13	H02	0.4511	0.4838	0.0327
orf19.3764	2395	GSG1	Plate 13	H03	0.451475	0.42755	-0.023925
orf19.3592	2345	JEM1	Plate 13	H04	0.449025	0.475775	0.02675
orf19.6091	2501	RIM8	Plate 13	H05	0.4309	0.533575	0.102675
orf19.4213	2976	FET31	Plate 13	H06	0.416225	0.4748	0.058575
orf19.4805	2998		Plate 13	H07	0.428375	0.4496	0.021225
orf19.1249	1736		Plate 13	H08	0.4215	0.44785	0.02635
orf19.4874	1824	MNN23	Plate 13	H09	0.39835	0.45525	0.0569
orf19.2930	2890		Plate 13	H10	0.436375	0.4358	-0.000574999
orf19.1665	3043	MNT1	Plate 13	H11	0.48605	0.47995	-0.00610001
orf19.2352	1860		Plate 13	H12	0.44915	0.4761	0.02695
orf19.5777	1922		Plate 14	A01	0.445725	0.459725	0.014
orf19.3922	2905		Plate 14	A02	0.4208	0.415175	-0.005625
orf19.3399	2922		Plate 14	A03	0.5384	0.43615	-0.10225
orf19.1185	2944		Plate 14	A04	0.44845	0.532775	0.084325
orf19.2848	2969		Plate 14	A05	0.40925	0.420525	0.011275
orf19.3212	2679	MID1	Plate 14	A06	0.3757	0.40945	0.03375
orf19.7176	2182	NPT1	Plate 14	A07	0.4107	0.377175	-0.033525
orf19.7243	2198		Plate 14	A08	0.4433	0.4626	0.0193
orf19.151	2671	TPO5	Plate 14	A09	0.409675	0.4468	0.037125
orf19.4573	2788	ZCF26	Plate 14	A10	0.4512	0.42615	-0.02505
orf19.3365	2809	DAO2	Plate 14	A11	0.441475	0.405875	-0.0356
orf19.3449	2824		Plate 14	A12	0.416025	0.434525	0.0185
orf19.2396	2883	IFR2	Plate 14	B01	0.4666	0.45245	-0.01415
orf19.2394	2884		Plate 14	B02	0.397175	0.35985	-0.037325
orf19.4788	1926	ARG5,6	Plate 14	B03	0.413975	0.377225	-0.03675
orf19.1800	1671		Plate 14	B04	0.380375	0.368275	-0.0121
orf19.2573	502	FRS1	Plate 14	B05	0.382675	0.019675	-0.363
orf19.329	506		Plate 14	B06	0.419	0.100675	-0.318325
orf19.332	507		Plate 14	B07	0.43285	0.1724	-0.26045
orf19.5106	508	DIP2	Plate 14	B08	0.42855	0.108775	-0.319775
orf19.4146	509	SMD3	Plate 14	B09	0.3892	0.009875	-0.379325
orf19.1064	510	ACS2	Plate 14	B10	0.3725	0.271775	-0.100725
orf19.3026	511	MAS1	Plate 14	B11	0.3601	0.042625	-0.317475
orf19.1833	512		Plate 14	B12	0.3805	0.0609	-0.3196
orf19.316	516	SEC13	Plate 14	C01	0.41825	0.312575	-0.105675
orf19.717	518	HSP60	Plate 14	C02	0.46285	0.112525	-0.350325
orf19.3393	519		Plate 14	C03	0.4136	0.311075	-0.102525
orf19.5486	520		Plate 14	C04	0.384225	0.117475	-0.26675
orf19.825	521	GCD7	Plate 14	C05	0.384325	0.151925	-0.2324
orf19.5493	522	GSP1	Plate 14	C06	0.419675	0.0258	-0.393875
orf19.2863.1	425	ERV1	Plate 14	C07	0.3813	0.374625	-0.00667501
orf19.7483	432	CRM1	Plate 14	C08	0.403825	0.23405	-0.169775
orf19.7454	422	TAF60	Plate 14	C09	0.40565	0.105225	-0.300425
orf19.4538	418		Plate 14	C10	0.431475	0.046225	-0.38525
orf19.4631	426	ERG251	Plate 14	C11	0.283275	0.192325	-0.09095
orf19.2917	380		Plate 14	C12	0.4271	0.03765	-0.38945
orf19.837	391	GNA1	Plate 14	D01	0.41205	0.30765	-0.1044
orf19.1390	379	PMI1	Plate 14	D02	0.4075	0.501325	0.093825
orf19.2183	383	KRE30	Plate 14	D03	0.407025	0.337075	-0.06995
orf19.6375	435	RPS20	Plate 14	D04	0.3427	0.007925	-0.334775
orf19.1478	417	STT3	Plate 14	D05	0.513725	0.061725	-0.452
orf19.4262	1592		Plate 14	D06	0.405225	0.386	-0.019225
orf19.6459	2479	DPP3	Plate 14	D07	0.39005	0.360625	-0.029425
orf19.2182	2487	BLM3	Plate 14	D08	0.4137	0.38245	-0.03125
orf19.2302	2464		Plate 14	D09	0.3473	0.338025	-0.009275
orf19.2695	2462	UBR1	Plate 14	D10	0.343425	0.337325	-0.0061
orf19.2991	2440	HOL1	Plate 14	D11	0.37735	0.357775	-0.019575
orf19.3546	2428	PEX2	Plate 14	D12	0.373675	0.37715	0.003475
orf19.4655	2430	OPT6	Plate 14	E01	0.4505	0.412975	-0.037525
orf19.6551	2453		Plate 14	E02	0.43385	0.245575	-0.188275
orf19.2242	1593	PRB1	Plate 14	E03	0.4279	0.393225	-0.034675
orf19.4608	2160	PDC12	Plate 14	E04	0.386175	0.37585	-0.010325
orf19.3124	2559		Plate 14	E05	0.41145	0.35295	-0.0585
orf19.1291	2683	ABZ1	Plate 14	E06	0.38915	0.385425	-0.00372501
orf19.2292	2706	OPT4	Plate 14	E07	0.450725	0.36605	-0.084675
orf19.333	2697	FCY2	Plate 14	E08	0.3785	0.3674	-0.0111
orf19.5932	2312		Plate 14	E09	0.3898	0.391775	0.001975
orf19.5023	2170	DAL7	Plate 14	E10	0.3852	0.377125	-0.008075
orf19.4985	2176	GUP1	Plate 14	E11	0.41715	0.42965	0.0125
orf19.943	2206	FET33	Plate 14	E12	0.408275	0.429325	0.02105
orf19.7551	2287	ALO1	Plate 14	F01	0.426425	0.4457	0.019275
orf19.1357	2685	FCY21	Plate 14	F02	0.422775	0.37305	-0.049725
orf19.4199	1714		Plate 14	F03	0.393675	0.360275	-0.0334
orf19.4077	1761	MIT1	Plate 14	F04	0.398075	0.36725	-0.030825
orf19.923	1725	THR1	Plate 14	F05	0.410025	0.14415	-0.265875
orf19.4318	1758	MIG1	Plate 14	F06	0.3426	0.3447	0.00210001
orf19.3658	1771		Plate 14	F07	0.36815	0.375575	0.00742501
orf19.1167	1786		Plate 14	F08	0.428325	0.36785	-0.060475
orf19.2939	1833		Plate 14	F09	0.368325	0.365975	-0.00235
orf19.2943	1835	DIP5	Plate 14	F10	0.381	0.38815	0.00714999
orf19.2555	1822	URA5	Plate 14	F11	0.4065	0.36765	-0.03885
orf19.2444	1800	CHS7	Plate 14	F12	0.446275	0.428625	-0.01765
orf19.5818	1838	SUR2	Plate 14	G01	0.4417	0.382775	-0.058925
orf19.1978	2795	GIT2	Plate 14	G02	0.43445	0.393175	-0.041275
orf19.97	2797	CAN1	Plate 14	G03	0.381125	0.3646	-0.016525
orf19.111	2805	CAN2	Plate 14	G04	0.401375	0.4009	-0.000474982
orf19.1153	2846	GAD1	Plate 14	G05	0.385225	0.390125	0.0049
orf19.2602	2875	OPT1	Plate 14	G06	0.380875	0.387775	0.0069
orf19.309	2934	DAL5	Plate 14	G07	0.397675	0.38475	-0.012925
orf19.5713	2947	YMX6	Plate 14	G08	0.3818	0.404325	0.022525
orf19.4063	2837	GPT1	Plate 14	G09	0.394975	0.39675	0.00177501
orf19.2170	3063	PHM7	Plate 14	G10	0.42405	0.410025	-0.014025
orf19.1311	2368	SPO75	Plate 14	G11	0.460975	0.4492	-0.011775
orf19.5037	2373	HRQ2	Plate 14	G12	0.431475	0.45845	0.026975
orf19.6305	1987		Plate 14	H01	0.44515	0.47375	0.0286
orf19.3577	2018	COQ5	Plate 14	H02	0.432075	0.4276	-0.004475
orf19.5384	2257	CHS8	Plate 14	H03	0.429225	0.44165	0.012425
orf19.7566	2289		Plate 14	H04	0.4057	0.47815	0.07245
orf19.1837	386	TBP1	Plate 14	H05	0.435775	0.015525	-0.42025
orf19.5232	323	CSI2	Plate 14	H06	0.44345	0.013275	-0.430175
orf19.2488	349	FAL1	Plate 14	H07	0.4127	0.44855	0.03585
orf19.672	365		Plate 14	H08	0.43355	0.480425	0.046875
orf19.4191	498	RLP24	Plate 14	H09	0.478625	0.373625	-0.105
orf19.2708	499		Plate 14	H10	0.43995	0.48355	0.0436
orf19.6039	500		Plate 14	H11	0.34955	0.012125	-0.337425
orf19.6175	501		Plate 14	H12	0.363875	0.0796	-0.284275
orf19.2402	314	SSU72	Plate 15	A01	0.39915	0.434425	0.035275
orf19.7618	322		Plate 15	A02	0.386525	0.1236	-0.262925
orf19.2518	264		Plate 15	A03	0.3092	0.0322	-0.277
orf19.5567	324	POP4	Plate 15	A04	0.386425	0.370825	-0.0156
orf19.706	325	NMD3	Plate 15	A05	0.39455	0.21645	-0.1781
orf19.516	317		Plate 15	A06	0.39285	0.36665	-0.0262
orf19.4582	307		Plate 15	A07	0.457075	0.0551	-0.401975
orf19.684	205		Plate 15	A08	0.4118	0.171675	-0.240125
orf19.2104	213		Plate 15	A09	0.425275	0.429875	0.0046
orf19.7657	106	POP3	Plate 15	A10	0.36655	0.4291	0.06255
orf19.4221	147	ORC4	Plate 15	A11	0.370425	0.123475	-0.24695
orf19.76	286	SPB1	Plate 15	A12	0.4213	0.02565	-0.39565
orf19.3276	288	PWP2	Plate 15	B01	0.37895	0.232375	-0.146575
orf19.6417	295	TSR1	Plate 15	B02	0.326575	0.340375	0.0138
orf19.4628	302		Plate 15	B03	0.316525	0.12125	-0.195275
orf19.6239	304		Plate 15	B04	0.3149	0.37795	0.06305
orf19.4618	305	FBA1	Plate 15	B05	0.292375	0.10515	-0.187225
orf19.1305	306		Plate 15	B06	0.344125	0.38325	0.039125
orf19.5432	310	TPT1	Plate 15	B07	0.33865	0.381225	0.042575
orf19.6879	338		Plate 15	B08	0.389175	0.38345	-0.00572499
orf19.3590	339	IPP1	Plate 15	B09	0.3913	0.108	-0.2833
orf19.661	340	KRR1	Plate 15	B10	0.387025	0.1798	-0.207225
orf19.7644	341		Plate 15	B11	0.325	0.128625	-0.196375
orf19.6424	342		Plate 15	B12	0.3542	0.359475	0.005275
orf19.1299	343	RPN6	Plate 15	C01	0.3765	0.156025	-0.220475
orf19.2720	344		Plate 15	C02	0.283425	0.038875	-0.24455
orf19.1742	345	HEM3	Plate 15	C03	0.319325	0.235075	-0.08425
orf19.526	346	NHP2	Plate 15	C04	0.335725	0.377125	0.0414
orf19.7477	347	YRB1	Plate 15	C05	0.363475	0.204125	-0.15935
orf19.6910	348	PSF1	Plate 15	C06	0.362525	0.396975	0.03445
orf19.269	350	SES1	Plate 15	C07	0.360125	0.087975	-0.27215
orf19.6749	351	KRS1	Plate 15	C08	0.355525	0.15415	-0.201375
orf19.401	363	TCP1	Plate 15	C09	0.2851	0.01495	-0.27015
orf19.528	364	SEC26	Plate 15	C10	0.31915	0.251975	-0.067175
orf19.4078	366		Plate 15	C11	0.368475	0.10915	-0.259325
orf19.2799	367	GPI8	Plate 15	C12	0.371525	0.322425	-0.0491
orf19.4726	368		Plate 15	D01	0.3932	0.438225	0.045025
orf19.5074	370		Plate 15	D02	0.34865	0.398175	0.049525
orf19.5793	371	PR26	Plate 15	D03	0.29365	0.0776	-0.21605
orf19.3347	372	RPB7	Plate 15	D04	0.33	0.167775	-0.162225
orf19.2893	373		Plate 15	D05	0.3287	0.3977	0.069
orf19.7236	374	TIF35	Plate 15	D06	0.303425	0.0931	-0.210325
orf19.410	369		Plate 15	D07	0.352875	0.413375	0.0605
orf19.1115	375	GUK1	Plate 15	D08	0.373775	0.341475	-0.0323
orf19.6696	377	TIM9	Plate 15	D09	0.338475	0.221325	-0.11715
orf19.2960	392	FRS2	Plate 15	D10	0.36215	0.044325	-0.317825
orf19.3628	385	RSP5	Plate 15	D11	0.37505	0.44035	0.0653
orf19.4025	381	PRE1	Plate 15	D12	0.33155	0.046875	-0.284675
orf19.3054	382	RPN3	Plate 15	E01	0.3166	0.027725	-0.288875
orf19.4154	389	SPB4	Plate 15	E02	0.370525	0.432725	0.0622
orf19.2417	215	SMC5	Plate 15	E03	0.3855	0.1614	-0.2241
orf19.4028	266		Plate 15	E04	0.33765	0.322425	-0.015225
orf19.1279	267	CDS1	Plate 15	E05	0.32815	0.205	-0.12315
orf19.2756	263		Plate 15	E06	0.340375	0.21385	-0.126525
orf19.2796	262		Plate 15	E07	0.38985	0.35465	-0.0352
orf19.5528	318	MOB1	Plate 15	E08	0.359975	0.401125	0.04115
orf19.2093	258	RFA1	Plate 15	E09	0.30595	0.030125	-0.275825
orf19.514	260	SNP3	Plate 15	E10	0.3596	0.343875	-0.015725
orf19.930	261	PET9	Plate 15	E11	0.384175	0.24025	-0.143925
orf19.2138	265	ILS1	Plate 15	E12	0.363975	0.079625	-0.28435
orf19.3673	320		Plate 15	F01	0.45295	0.104675	-0.348275
orf19.2688	173	NAN1	Plate 15	F02	0.3558	0.07185	-0.28395
orf19.6252	226		Plate 15	F03	0.34225	0.423025	0.080775
orf19.5076	327	PFY1	Plate 15	F04	0.338875	0.467875	0.129
orf19.6642	328		Plate 15	F05	0.35095	0.049325	-0.301625
orf19.5817	329		Plate 15	F06	0.348925	0.408475	0.05955
orf19.3951	332	TIP1	Plate 15	F07	0.3336	0.04625	-0.28735
orf19.5010	336	DIM1	Plate 15	F08	0.378875	0.32655	-0.052325
orf19.1814	313	STT4	Plate 15	F09	0.350475	0.428175	0.0777
orf19.6131	233	KSR1	Plate 15	F10	0.38035	0.387075	0.006725
orf19.4606	31	ERG8	Plate 15	F11	0.3654	0.1232	-0.2422
orf19.4863	181	PDC2	Plate 15	F12	0.40035	0.408175	0.007825
orf19.3256	182	SLN1	Plate 15	G01	0.410775	0.39005	-0.020725
orf19.1589	183		Plate 15	G02	0.36535	0.4121	0.04675
orf19.4448	184	SOG2	Plate 15	G03	0.363475	0.41885	0.055375
orf19.2041	185		Plate 15	G04	0.3811	0.454225	0.073125
orf19.2507	186	ARP9	Plate 15	G05	0.399325	0.49475	0.095425
orf19.5356	188		Plate 15	G06	0.350575	0.318325	-0.03225
orf19.1609	190		Plate 15	G07	0.389125	0.450325	0.0612
orf19.3116	297	EXM2	Plate 15	G08	0.45385	0.1141	-0.33975
orf19.1885	69	TAF4	Plate 15	G09	0.323725	0.0684	-0.255325
orf19.2922	225		Plate 15	G10	0.385875	0.4354	0.049525
orf19.680	141	TIM50	Plate 15	G11	0.364325	0.3302	-0.034125
orf19.2820	216		Plate 15	G12	0.44725	0.449825	0.00257499
orf19.4871	132	ERO1	Plate 15	H01	0.428175	0.2442	-0.183975
orf19.7037	105	YAE1	Plate 15	H02	0.40325	0.460075	0.056825
orf19.135	107	EXO84	Plate 15	H03	0.416325	0.468625	0.0523
orf19.3322	280	DUT1	Plate 15	H04	0.437375	0.4721	0.034725
orf19.3317	281	MED22	Plate 15	H05	0.4178	0.5004	0.0826
orf19.3314	282		Plate 15	H06	0.430975	0.420625	-0.01035
orf19.5130	285	PDI1	Plate 15	H07	0.485	0.364175	-0.120825
orf19.3778	289		Plate 15	H08	0.435975	0.394625	-0.04135
orf19.4724	292		Plate 15	H09	0.53605	0.214025	-0.322025
orf19.5200	293	SIT4	Plate 15	H10	0.45365	0.4261	-0.02755
orf19.5647	296	SUB2	Plate 15	H11	0.4035	0.0189	-0.3846
orf19.6524	96	TOM40	Plate 15	H12	0.4151	0.18705	-0.22805
orf19.2830	241	RRP9	Plate 16	A01	0.426325	0.31405	-0.112275
orf19.1769	242		Plate 16	A02	0.44035	0.462475	0.022125
orf19.5492	243		Plate 16	A03	0.459475	0.310175	-0.1493
orf19.302	244		Plate 16	A04	0.4265	0.3591	-0.0674
orf19.1646	247		Plate 16	A05	0.419575	0.36675	-0.052825
orf19.5407	248	SOF1	Plate 16	A06	0.467825	0.20695	-0.260875
orf19.4835	249		Plate 16	A07	0.457875	0.212975	-0.2449
orf19.6044	252	MOB2	Plate 16	A08	0.46365	0.27405	-0.1896
orf19.498	2572		Plate 16	A09	0.430625	0.25215	-0.178475
orf19.7597	2650	PGA12	Plate 16	A10	0.4117	0.40945	-0.00224999
orf19.3575	257	CDC19	Plate 16	A11	0.379025	0.139075	-0.23995
orf19.5131	1074		Plate 16	A12	0.36085	0.3905	0.02965
orf19.2117	1911	LEU5	Plate 16	B01	0.442175	0.389625	-0.05255
orf19.3324	1938	TIF	Plate 16	B02	0.390225	0.04555	-0.344675
orf19.5858	1939	EGD2	Plate 16	B03	0.36825	0.33925	-0.029
orf19.984	2024	PHO8	Plate 16	B04	0.381375	0.367925	-0.01345
orf19.2607	1327		Plate 16	B05	0.369025	0.3719	0.002875
orf19.4106	34		Plate 16	B06	0.38385	0.4028	0.01895
orf19.2803	352	HEM13	Plate 16	B07	0.3839	0.3326	-0.0513
orf19.936	3296		Plate 16	B08	0.339375	0.347875	0.00849999
orf19.7382	3321	CAM1	Plate 16	B09	0.37175	0.3778	0.00604999
orf19.7561	3348	DEF1	Plate 16	B10	0.3124	0.4535	0.1411
orf19.5926	3368	ARG11	Plate 16	B11	0.36555	0.406025	0.040475
orf19.641	3400		Plate 16	B12	0.408225	0.3781	-0.030125
orf19.6169	3426	ATO1	Plate 16	C01	0.4062	0.385075	-0.021125
orf19.6858	3446	EDC3	Plate 16	C02	0.365775	0.418825	0.05305
orf19.7269	3474		Plate 16	C03	0.37235	0.386	0.01365
orf19.4195.1	3731	FCA1	Plate 16	C04	0.37085	0.40645	0.0356
orf19.3534	3737	RHO3	Plate 16	C05	0.40195	0.379125	-0.022825
orf19.4274	3741	PUT1	Plate 16	C06	0.370925	0.4626	0.091675
orf19.1395	1971		Plate 16	C07	0.372225	0.387575	0.01535
orf19.2095	2109		Plate 16	C08	0.435375	0.397525	-0.03785
orf19.3047	2149		Plate 16	C09	0.33175	0.372675	0.040925
orf19.2131	3010		Plate 16	C10	0.367475	0.3346	-0.032875
orf19.2143	3011		Plate 16	C11	0.375475	0.3953	0.019825
orf19.2146	3012	HAT2	Plate 16	C12	0.417375	0.401275	-0.0161
orf19.6322	3022	ARD	Plate 16	D01	0.412325	0.44095	0.028625
orf19.2311	3024	RPL82	Plate 16	D02	0.368575	0.412175	0.0436
orf19.28	3054		Plate 16	D03	0.3521	0.38885	0.03675
orf19.5760	3085	IHD1	Plate 16	D04	0.366225	0.386075	0.01985
orf19.6382	2027		Plate 16	D05	0.3482	0.378525	0.030325
orf19.2028	2039	MXR1	Plate 16	D06	0.36855	0.3766	0.00804999
orf19.2098	2108	ARO8	Plate 16	D07	0.356475	0.39905	0.042575
orf19.6045	2126		Plate 16	D08	0.3803	0.3832	0.0029
orf19.7231	3294	FTR2	Plate 16	D09	0.355775	0.37765	0.021875
orf19.5229	1188		Plate 16	D10	0.352775	0.10335	-0.249425
orf19.4497	73	MED8	Plate 16	D11	0.3851	0.09245	-0.29265
orf19.1111	695		Plate 16	D12	0.418725	0.247675	-0.17105
orf19.1661	708	DBP5	Plate 16	E01	0.4284	0.191325	-0.237075
orf19.5416	712	ESA1	Plate 16	E02	0.37805	0.30585	-0.0722
orf19.7635	745	DRS1	Plate 16	E03	0.3691	0.399625	0.030525
orf19.1413	758	YFH1	Plate 16	E04	0.3654	0.369825	0.004425
orf19.6913	761	GCN2	Plate 16	E05	0.356225	0.3624	0.006175
orf19.4341	803		Plate 16	E06	0.35565	0.342075	-0.013575
orf19.3207	1880	CCN1	Plate 16	E07	0.353475	0.3666	0.013125
orf19.57	465	PSF2	Plate 16	E08	0.347825	0.388975	0.04115
orf19.2909	414	ERG26	Plate 16	E09	0.359725	0.39125	0.031525
orf19.5156	468		Plate 16	E10	0.0023	0.003725	0.001425
orf19.6529	355	CDC34	Plate 16	E11	0.361925	0.381675	0.01975
orf19.3166	308		Plate 16	E12	0.442	0.46865	0.02665
orf19.1803	312	CDC43	Plate 16	F01	0.249475	0.373225	0.12375
orf19.583	2013		Plate 16	F02	0.3499	0.40475	0.05485
orf19.3567	2020	BIO32	Plate 16	F03	0.359975	0.360925	0.000950009
orf19.1180	2733		Plate 16	F04	0.39445	0.359575	-0.034875
orf19.4899	2753	GCA1	Plate 16	F05	0.34525	0.3894	0.04415
orf19.4128	2800		Plate 16	F06	0.4129	0.39375	-0.01915
orf19.2626	2814	RGD3	Plate 16	F07	0.368575	0.397475	0.0289
orf19.1891	2058	"APR1"	Plate 16	F08	0.358375	0.4116	0.053225
orf19.1881	2059		Plate 16	F09	0.3632	0.4018	0.0386
orf19.1871	2061		Plate 16	F10	0.3302	0.354625	0.024425
orf19.1865	2062		Plate 16	F11	0.355175	0.37295	0.017775
orf19.496	2063		Plate 16	F12	0.425525	0.437875	0.01235
orf19.1477	2065		Plate 16	G01	0.4383	0.451975	0.013675
orf19.1468	2066		Plate 16	G02	0.3664	0.4511	0.0847
orf19.1462	2067	SMP2	Plate 16	G03	0.369475	0.372725	0.00324999
orf19.6875	2071	VPS35	Plate 16	G04	0.373225	0.405175	0.03195
orf19.6904	2076	GCN3	Plate 16	G05	0.3654	0.3893	0.0239
orf19.6915	2079	MRE11	Plate 16	G06	0.381525	0.396225	0.0147
orf19.3298	2080	CCH1	Plate 16	G07	0.39485	0.39465	-0.000199988
orf19.3307	2081		Plate 16	G08	0.378475	0.4001	0.021625
orf19.350	2084	PRE9	Plate 16	G09	0.402475	0.39805	-0.004425
orf19.4447	2088	YMC1	Plate 16	G10	0.387825	0.395725	0.0079
orf19.897	2091	VPS20	Plate 16	G11	0.391325	0.42475	0.033425
orf19.6933	2094		Plate 16	G12	0.4084	0.411125	0.00272501
orf19.4845	2098		Plate 16	H01	0.419575	0.478175	0.0586
orf19.6981	2141		Plate 16	H02	0.4066	0.466125	0.059525
orf19.6990	2143		Plate 16	H03	0.454975	0.44375	-0.011225
orf19.3029	2146		Plate 16	H04	0.428975	0.505325	0.07635
orf19.3035	2147		Plate 16	H05	0.4432	0.306625	-0.136575
orf19.3049	2150		Plate 16	H06	0.47905	0.478725	-0.000324972
orf19.6425	2152		Plate 16	H07	0.4403	0.462925	0.022625
orf19.4587	2157	HGH1	Plate 16	H08	0.42355	0.48865	0.0651
orf19.7029	2166		Plate 16	H09	0.40275	0.484775	0.082025
orf19.5025	2169	MET3	Plate 16	H10	0.476375	0.4753	-0.00107501
orf19.5004	2175	RAD54	Plate 16	H11	0.428275	0.42185	-0.00642501
orf19.7152	2178		Plate 16	H12	0.45115	0.467225	0.016075
orf19.7156	2179	FAA2-3	Plate 17	A01	0.424225	0.35845	-0.065775
orf19.5720	2388		Plate 17	A02	0.40095	0.4023	0.00135001
orf19.3402	2414	FPG1	Plate 17	A03	0.3938	0.356975	-0.036825
orf19.1719	2437	SGA1	Plate 17	A04	0.407875	0.422225	0.01435
orf19.6195	2458		Plate 17	A05	0.4514	0.467175	0.015775
orf19.6138	2466		Plate 17	A06	0.408525	0.3818	-0.026725
orf19.2484	2494		Plate 17	A07	0.48375	0.432375	-0.051375
orf19.2008	2506		Plate 17	A08	0.455425	0.419725	-0.0357
orf19.6699	2546		Plate 17	A09	0.42215	0.491025	0.068875
orf19.5658	2552	MNN10	Plate 17	A10	0.43405	0.439875	0.00582501
orf19.6190	294	SRB1	Plate 17	A11	0.485375	0.2647	-0.220675
orf19.6828.1	356		Plate 17	A12	0.51365	0.239525	-0.274125
orf19.3034	358	RLI1	Plate 17	B01	0.412775	0.217025	-0.19575
orf19.3242	359		Plate 17	B02	0.389	0.2976	-0.0914
orf19.1378	360	SUP35	Plate 17	B03	0.363125	0.39875	0.035625
orf19.744	1853	GDB1	Plate 17	B04	0.416375	0.364525	-0.05185
orf19.5377	1855	HOS2	Plate 17	B05	0.43795	0.353325	-0.084625
orf19.5480	1857	ILV1	Plate 17	B06	0.398925	0.390975	-0.00795
orf19.5484	1859	SER1	Plate 17	B07	0.4004	0.357275	-0.043125
orf19.3751	1864		Plate 17	B08	0.39385	0.319725	-0.074125
orf19.3542	1869	LEM3	Plate 17	B09	0.45345	0.41725	-0.0362
orf19.299	1870	ECM14	Plate 17	B10	0.39945	0.377875	-0.021575
orf19.4940	2053		Plate 17	B11	0.424675	0.36385	-0.060825
orf19.7604	11		Plate 17	B12	0.40695	0.301925	-0.105025
orf19.607	1916		Plate 17	C01	0.455425	0.412775	-0.04265
orf19.5865	1940		Plate 17	C02	0.38575	0.437825	0.052075
orf19.4841	2099	SHY1	Plate 17	C03	0.3812	0.316275	-0.064925
orf19.4827	2101	ADE12	Plate 17	C04	0.4215	0.266925	-0.154575
orf19.4826	2102	IDH1	Plate 17	C05	0.4057	0.4271	0.0214
orf19.2092	2110		Plate 17	C06	0.3226	0.33525	0.01265
orf19.2073	2111		Plate 17	C07	0.375475	0.34735	-0.028125
orf19.2067	2113		Plate 17	C08	0.387275	0.35015	-0.037125
orf19.3811	2117	GYP1	Plate 17	C09	0.4093	0.373075	-0.036225
orf19.3822	2119	SCS7	Plate 17	C10	0.403	0.363775	-0.039225
orf19.3841	2121		Plate 17	C11	0.399625	0.369075	-0.03055
orf19.6558	2122		Plate 17	C12	0.4067	0.39195	-0.01475
orf19.6561	2123	LAT1	Plate 17	D01	0.388475	0.42915	0.040675
orf19.6041	2124	RPO41	Plate 17	D02	0.430475	0.2555	-0.174975
orf19.6058	2127	GLO1	Plate 17	D03	0.4453	0.364825	-0.080475
orf19.6070	2129	ENA2	Plate 17	D04	0.434075	0.35755	-0.076525
orf19.6533	2131	MSK1	Plate 17	D05	0.41435	0.3876	-0.02675
orf19.5280	2133	MUP1	Plate 17	D06	0.429325	0.36325	-0.066075
orf19.5265	2134	KIP4	Plate 17	D07	0.37455	0.370725	-0.00382499
orf19.5263	2135	SER33	Plate 17	D08	0.40925	0.306825	-0.102425
orf19.5253	2136		Plate 17	D09	0.39365	0.38345	-0.0102
orf19.4297	1891	CKB2	Plate 17	D10	0.399225	0.392275	-0.00695
orf19.606	1917		Plate 17	D11	0.428875	0.373525	-0.05535
orf19.1324	1925	RAD2	Plate 17	D12	0.41015	0.4188	0.00864999
orf19.6385	2028	ACO1	Plate 17	E01	0.472825	0.343075	-0.12975
orf19.3870	2029	ADE13	Plate 17	E02	0.411425	0.342275	-0.06915
orf19.2251	2034	AAH1	Plate 17	E03	0.417125	0.38435	-0.032775
orf19.4932	2038		Plate 17	E04	0.44125	0.375975	-0.065275
orf19.2031	2041	VPS24	Plate 17	E05	0.4264	0.36165	-0.06475
orf19.2043	2045		Plate 17	E06	0.478825	0.362375	-0.11645
orf19.2046	2047	POT1-2	Plate 17	E07	0.4035	0.378625	-0.024875
orf19.2050	2048		Plate 17	E08	0.317975	0.3638	0.045825
orf19.4945	2052	MSH6	Plate 17	E09	0.392825	0.36775	-0.025075
orf19.6063	2128	UBP6	Plate 17	E10	0.340825	0.339375	-0.00144999
orf19.6237	1945	RAC1	Plate 17	E11	0.402025	0.34075	-0.061275
orf19.6306	1988		Plate 17	E12	0.43505	0.415825	-0.019225
orf19.2306	1992		Plate 17	F01	0.465475	0.535925	0.07045
orf19.1936	1998	SNF1	Plate 17	F02	0.46255	0.428775	-0.033775
orf19.3982	2009		Plate 17	F03	0.418075	0.279025	-0.13905
orf19.6011	1942	SIN3	Plate 17	F04	0.4511	0.42155	-0.02955
orf19.2425	1951	HGT18	Plate 17	F05	0.570675	0.3917	-0.178975
orf19.2415	1953		Plate 17	F06	0.405925	0.41785	0.011925
orf19.6178	1979	FBP1	Plate 17	F07	0.381725	0.36885	-0.012875
orf19.6287	1984	AAT21	Plate 17	F08	0.387025	0.386	-0.00102501
orf19.7390	2245	REV3	Plate 17	F09	0.3939	0.38365	-0.01025
orf19.2124	2327		Plate 17	F10	0.408475	0.38535	-0.023125
orf19.5986	2304	THI4	Plate 17	F11	0.424225	0.405075	-0.01915
orf19.5752	1056		Plate 17	F12	0.456575	0.419225	-0.03735
orf19.5747	2363		Plate 17	G01	0.4505	0.317875	-0.132625
orf19.3482	2443		Plate 17	G02	0.4537	0.4237	-0.03
orf19.5862	2445	AFP99	Plate 17	G03	0.439675	0.38045	-0.059225
orf19.4283	2451		Plate 17	G04	0.3855	0.2583	-0.1272
orf19.3710	2456	YHB5	Plate 17	G05	0.377	0.33795	-0.03905
orf19.6152	2465		Plate 17	G06	0.450975	0.40105	-0.049925
orf19.4630	1655	CPA1	Plate 17	G07	0.37035	0.39535	0.025
orf19.7213	2192		Plate 17	G08	0.385175	0.386575	0.00139999
orf19.3249	2213	LAG1	Plate 17	G09	0.42505	0.495825	0.070775
orf19.5641	1884	CAR2	Plate 17	G10	0.41475	0.40695	-0.0078
orf19.4201	1934	NHX1	Plate 17	G11	0.42265	0.4032	-0.01945
orf19.354	2582		Plate 17	G12	0.4428	0.457625	0.014825
orf19.4446	2584		Plate 17	H01	0.484325	0.4675	-0.016825
orf19.6928	2586	SAP9	Plate 17	H02	0.448	0.447975	-2.49892e-05
orf19.4610	2603		Plate 17	H03	0.438475	0.45595	0.017475
orf19.7010	2605		Plate 17	H04	0.4684	0.490075	0.021675
orf19.7218	2609	RBE1	Plate 17	H05	0.4857	0.497975	0.012275
orf19.7336	2620		Plate 17	H06	0.3844	0.471525	0.087125
orf19.7095	2623		Plate 17	H07	0.39035	0.250375	-0.139975
orf19.1415	2509	FRE10	Plate 17	H08	0.44905	0.39475	-0.0543
orf19.1545	2512		Plate 17	H09	0.465	0.376875	-0.088125
orf19.524	2540		Plate 17	H10	0.40085	0.448025	0.047175
orf19.5656	2551		Plate 17	H11	0.419175	0.466225	0.04705
orf19.5661	2553	PTC7	Plate 17	H12	0.449025	0.445375	-0.00365
orf19.5673	2557	OPT7	Plate 18	A01	0.404475	0.439175	0.0347
orf19.5677	2558	DUR4	Plate 18	A02	0.409975	0.447	0.037025
orf19.5160	2565		Plate 18	A03	0.413025	0.40395	-0.00907501
orf19.6886	2575		Plate 18	A04	0.43445	0.124325	-0.310125
orf19.6900	2577		Plate 18	A05	0.438625	0.482225	0.0436
orf19.2436	1798		Plate 18	A06	0.409975	0.4575	0.047525
orf19.2438	1799		Plate 18	A07	0.518	0.3228	-0.1952
orf19.4186	1802	PCT1	Plate 18	A08	0.4562	0.4708	0.0146
orf19.763	1805		Plate 18	A09	0.4632	0.46365	0.00045
orf19.5224	1810		Plate 18	A10	0.45305	0.44565	-0.00740001
orf19.685	1812	YHM1	Plate 18	A11	0.4217	0.433675	0.011975
orf19.3089	1816		Plate 18	A12	0.4333	0.44295	0.00965001
orf19.3463	1819		Plate 18	B01	0.401175	0.429725	0.02855
orf19.4356	1821	HGT3	Plate 18	B02	0.38215	0.397025	0.014875
orf19.2640	1823	FUR1	Plate 18	B03	0.371525	0.386925	0.0154
orf19.1760	1842	RAS1	Plate 18	B04	0.394075	0.4818	0.087725
orf19.2601	1845	HEM1	Plate 18	B05	0.4213	0.35885	-0.06245
orf19.5550	1851	MRT4	Plate 18	B06	0.4206	0.4576	0.037
orf19.742	1852	ALD6	Plate 18	B07	0.3972	0.3969	-0.000299998
orf19.4897	2407		Plate 18	B08	0.403225	0.418725	0.0155
orf19.4233	1103	THR4	Plate 18	B09	0.3881	0.22985	-0.15825
orf19.6230	1946		Plate 18	B10	0.343375	0.385525	0.04215
orf19.6328	3428		Plate 18	B11	0.354425	0.363525	0.0091
orf19.2998	2965	TSR2	Plate 18	B12	0.380975	0.3607	-0.020275
orf19.4375	1887		Plate 18	C01	0.37765	0.450325	0.072675
orf19.1333	2392	SNG3	Plate 18	C02	0.384575	0.3893	0.004725
orf19.600	1918	TRK1	Plate 18	C03	0.365875	0.34835	-0.017525
orf19.956	3297		Plate 18	C04	0.3763	0.368875	-0.007425
orf19.4569	3391		Plate 18	C05	0.451575	0.380625	-0.07095
orf19.6522	3252		Plate 18	C06	0.36495	0.38175	0.0168
orf19.5495	1899		Plate 18	C07	0.3695	0.305925	-0.063575
orf19.5517	1119		Plate 18	C08	0.3685	0.40545	0.03695
orf19.4506	1162	LYS22	Plate 18	C09	0.364825	0.37455	0.009725
orf19.6214	2939	ATC1	Plate 18	C10	0.363475	0.380275	0.0168
orf19.2953	3441	TOM20	Plate 18	C11	0.370575	0.382825	0.01225
orf19.1235	2987	HOM3	Plate 18	C12	0.421925	0.396325	-0.0256
orf19.7298	884	CHS2	Plate 18	D01	0.3966	0.4939	0.0973
orf19.2862	926	RIB1	Plate 18	D02	0.373275	0.137925	-0.23535
orf19.2534	932	PIN4	Plate 18	D03	0.376725	0.389875	0.01315
orf19.4679	1009	AGP2	Plate 18	D04	0.37215	0.373425	0.00127501
orf19.3591	1058	APE3	Plate 18	D05	0.370975	0.381025	0.01005
orf19.1308	1062		Plate 18	D06	0.379975	0.380575	0.00060001
orf19.2454	1096	PHO87	Plate 18	D07	0.37925	0.419725	0.040475
orf19.2821	1362		Plate 18	D08	0.413725	0.3881	-0.025625
orf19.633	1412		Plate 18	D09	0.355325	0.363625	0.00830001
orf19.3395	1512		Plate 18	D10	0.360575	0.379425	0.01885
orf19.2964	1578		Plate 18	D11	0.35605	0.2587	-0.09735
orf19.4633	1633		Plate 18	D12	0.38865	0.41005	0.0214
orf19.785	1980	FLC2	Plate 18	E01	0.4259	0.485	0.0591
orf19.2693	1985	GST2	Plate 18	E02	0.372325	0.374975	0.00265001
orf19.6043	2125		Plate 18	E03	0.3761	0.3712	-0.0049
orf19.5005	2174	OSM2	Plate 18	E04	0.37705	0.3705	-0.00655001
orf19.7397	2249		Plate 18	E05	0.3625	0.35425	-0.00825001
orf19.1658	2326		Plate 18	E06	0.372275	0.36805	-0.004225
orf19.5672	2556	MEP2	Plate 18	E07	0.363825	0.37125	0.007425
orf19.3121	2561	GST1	Plate 18	E08	0.357675	0.3545	-0.00317501
orf19.6766	2646		Plate 18	E09	0.36265	0.37115	0.0085
orf19.4802	2842	FTH1	Plate 18	E10	0.359775	0.37255	0.012775
orf19.355	3219		Plate 18	E11	0.363875	0.378475	0.0146
orf19.2703	1986		Plate 18	E12	0.443125	0.4435	0.000375003
orf19.6057	1023		Plate 18	F01	0.4418	0.480325	0.038525
orf19.4475	1028	KTR4	Plate 18	F02	0.3609	0.395175	0.034275
orf19.2007	2507		Plate 18	F03	0.368625	0.3979	0.029275
orf19.3770	2777	ARG8	Plate 18	F04	0.375425	0.375875	0.00045
orf19.313	970	DAL4	Plate 18	F05	0.380875	0.38255	0.00167502
orf19.2771	2527	BEM3	Plate 18	F06	0.376175	0.391775	0.0156
orf19.3208	2928	DAL52	Plate 18	F07	0.384575	0.37465	-0.00992499
orf19.4705	72		Plate 18	F08	0.3667	0.02515	-0.34155
orf19.1960	896	CLN3	Plate 18	F09	0.344175	0.149025	-0.19515
orf19.137	980		Plate 18	F10	0.357425	0.397375	0.03995
orf19.3649	997		Plate 18	F11	0.368025	0.435775	0.06775
orf19.7327	1000	PHO88	Plate 18	F12	0.41245	0.4294	0.01695
orf19.1364	1013		Plate 18	G01	0.4301	0.4655	0.0354
orf19.553	1025		Plate 18	G02	0.38345	0.38625	0.0028
orf19.5118	1032	SDS24	Plate 18	G03	0.363075	0.37505	0.011975
orf19.5869	1061		Plate 18	G04	0.370075	0.41265	0.042575
orf19.4548	1087	MAK32	Plate 18	G05	0.40025	0.4098	0.00955
orf19.3558	1125		Plate 18	G06	0.3813	0.370475	-0.010825
orf19.7367	1155	UBP1	Plate 18	G07	0.4022	0.4113	0.00910001
orf19.403	1159	PCL2	Plate 18	G08	0.38775	0.40515	0.0174
orf19.52	1587		Plate 18	G09	0.39365	0.3989	0.00524999
orf19.3139	2033		Plate 18	G10	0.3873	0.4097	0.0224
orf19.7359	2239	CRZ1	Plate 18	G11	0.389625	0.426875	0.03725
orf19.7517	2272	CHT1	Plate 18	G12	0.409575	0.44	0.030425
orf19.4769	2321	IPT1	Plate 18	H01	0.458775	0.47795	0.019175
orf19.3930	2745	YUH2	Plate 18	H02	0.4392	0.445475	0.00627501
orf19.3415	2823	PTK2	Plate 18	H03	0.429825	0.434925	0.00509999
orf19.1699	2839	BZZ1	Plate 18	H04	0.425375	0.47675	0.051375
orf19.1236	2986		Plate 18	H05	0.43805	0.417875	-0.020175
orf19.212	3425	VPS28	Plate 18	H06	0.4518	0.4829	0.0311
orf19.4183	3435	MUC1	Plate 18	H07	0.4464	0.4249	-0.0215
orf19.5903	3483	RAX1	Plate 18	H08	0.423375	0.4515	0.028125
orf6.2225	3488	MFG1	Plate 18	H09	0.453925	0.454825	0.000900008
orf19.1555	3123	SAC3	Plate 18	H10	0.459025	0.393425	-0.0656
orf19.6877	3507	PNG2	Plate 18	H11	0.448075	0.455725	0.00764999
orf19.2940	504		Plate 18	H12	0.559775	0.202025	-0.35775
orf19.3609	240	UTP15	Plate 19	A01	0.4462	0.2284	-0.2178
orf19.979	167	FAS1	Plate 19	A02	0.308	0.170325	-0.137675
orf19.1285	2915		Plate 19	A03	0.449275	0.3979	-0.051375
orf19.5816	2904	EBP7	Plate 19	A04	0.447275	0.375875	-0.0714
orf19.4240	1098		Plate 19	A05	0.45665	0.41545	-0.0412
orf19.1639	2669		Plate 19	A06	0.41675	0.428025	0.011275
orf19.6727	2550	RIT1	Plate 19	A07	0.455075	0.37955	-0.075525
orf19.349	2581		Plate 19	A08	0.50395	0.487825	-0.016125
orf19.7577	2648	MSS51	Plate 19	A09	0.4356	0.347075	-0.088525
orf19.1130	2675		Plate 19	A10	0.441775	0.39915	-0.042625
orf19.5925	2657		Plate 19	A11	0.4213	0.3629	-0.0584
orf19.7516	3336		Plate 19	A12	0.421	0.416525	-0.004475
orf19.4211	2978	FET3	Plate 19	B01	0.395275	0.345475	-0.0498
orf19.4760	2942		Plate 19	B02	0.39545	0.404975	0.00952501
orf19.216	2993		Plate 19	B03	0.393675	0.368675	-0.025
orf19.5849	1930	CWT1	Plate 19	B04	0.365675	0.3651	-0.000574999
orf19.2423	1952	ZCF11	Plate 19	B05	0.38115	0.3781	-0.00304999
orf19.991	2023	DJP1	Plate 19	B06	0.381625	0.33485	-0.046775
orf19.1493	3382	RAD7	Plate 19	B07	0.3813	0.344	-0.0373
orf19.5978	3360		Plate 19	B08	0.3739	0.350725	-0.023175
orf19.4546	3160	HOL4	Plate 19	B09	0.40645	0.352425	-0.054025
orf19.1799	1231	GAP5	Plate 19	B10	0.382425	0.39615	0.013725
orf19.4287	1367		Plate 19	B11	0.38215	0.35665	-0.0255
orf19.5592	1369		Plate 19	B12	0.419875	0.41255	-0.00732499
orf19.1171	1403		Plate 19	C01	0.411325	0.345225	-0.0661
orf19.6449	1469		Plate 19	C02	0.3876	0.36885	-0.01875
orf19.3929	1641		Plate 19	C03	0.386225	0.347425	-0.0388
orf19.5749	1659	SBA1	Plate 19	C04	0.372375	0.3533	-0.019075
orf19.6398	2153		Plate 19	C05	0.391125	0.37525	-0.015875
orf19.125	1700	EBP1	Plate 19	C06	0.382425	0.34875	-0.033675
orf19.4060	1738	ARO4	Plate 19	C07	0.38575	0.4159	0.03015
orf19.2151	1978	NAG6	Plate 19	C08	0.3958	0.3603	-0.0355
orf19.1823	1784		Plate 19	C09	0.45075	0.363475	-0.087275
orf19.6166	1966		Plate 19	C10	0.374625	0.359175	-0.01545
orf19.7158	2180		Plate 19	C11	0.367225	0.3477	-0.019525
orf19.857	2699	FMO2	Plate 19	C12	0.4081	0.382725	-0.025375
orf19.5455	2263		Plate 19	D01	0.416975	0.4324	0.015425
orf19.2681	2960	RBT7	Plate 19	D02	0.394975	0.361325	-0.03365
orf19.5780	2963		Plate 19	D03	0.38525	0.4047	0.01945
orf19.5859	2982	DAL8	Plate 19	D04	0.40065	0.344875	-0.055775
orf19.4210	2979		Plate 19	D05	0.389025	0.3546	-0.034425
orf19.4688	2736	DAG7	Plate 19	D06	0.409575	0.370975	-0.0386
orf19.1663	3042	MNT2	Plate 19	D07	0.415925	0.378975	-0.03695
orf19.105	2799	HAL22	Plate 19	D08	0.380875	0.358725	-0.02215
orf19.3203	2929	RCY1	Plate 19	D09	0.40525	0.350225	-0.055025
orf19.56	2940	ARG2	Plate 19	D10	0.372225	0.3851	0.012875
orf19.4171	3058		Plate 19	D11	0.420575	0.3622	-0.058375
orf19.1583	2457		Plate 19	D12	0.395875	0.419225	0.02335
orf19.4142	1959		Plate 19	E01	0.497975	0.393775	-0.1042
orf19.6185	1981		Plate 19	E02	0.3719	0.337275	-0.034625
orf19.592	2011		Plate 19	E03	0.35735	0.3536	-0.00375
orf19.7247	2200	RIM101	Plate 19	E04	0.390025	0.443175	0.05315
orf19.183	2323	HIS3	Plate 19	E05	0.3442	0.348325	0.004125
orf19.238	2325	CCP1	Plate 19	E06	0.428275	0.36805	-0.060225
orf19.3151	2342		Plate 19	E07	0.410925	0.371875	-0.03905
orf19.6772	3341	EMC29	Plate 19	E08	0.407225	0.368775	-0.03845
orf19.1946	3389		Plate 19	E09	0.401675	0.3599	-0.041775
orf19.5615	3376	AYR2	Plate 19	E10	0.3929	0.378575	-0.014325
orf19.7475	3333	PHO81	Plate 19	E11	0.398025	0.3791	-0.018925
orf19.5971	3361		Plate 19	E12	0.408675	0.417775	0.00910001
orf19.7257	3295		Plate 19	F01	0.48925	0.390675	-0.098575
orf19.2563	3404		Plate 19	F02	0.4034	0.40265	-0.000750005
orf19.5894	3371		Plate 19	F03	0.41045	0.3536	-0.05685
orf19.4743	3402	AFG1	Plate 19	F04	0.398025	0.3599	-0.038125
orf19.1641	3126		Plate 19	F05	0.400175	0.36535	-0.034825
orf19.4351	2826	PRP13	Plate 19	F06	0.424475	0.362325	-0.06215
orf19.4771	3411		Plate 19	F07	0.407175	0.379425	-0.02775
orf19.7650	3354	LTV1	Plate 19	F08	0.433925	0.37365	-0.060275
orf19.7219	3292	FTR1	Plate 19	F09	0.422475	0.370675	-0.0518
orf19.4424	3395	PHO100	Plate 19	F10	0.409225	0.372	-0.037225
orf19.835	3405		Plate 19	F11	0.4041	0.3631	-0.041
orf19.733	1059		Plate 19	F12	0.406675	0.41275	0.00607499
orf19.1345	1389	LIP8	Plate 19	G01	0.477225	0.427725	-0.0495
orf19.1142	1666		Plate 19	G02	0.44315	0.400125	-0.043025
orf19.1193	1720	GNP1	Plate 19	G03	0.4051	0.365975	-0.039125
orf19.2798	1815		Plate 19	G04	0.400675	0.406575	0.0059
orf19.7486	2266	MRPL6	Plate 19	G05	0.403	0.3423	-0.0607
orf19.6747	3346		Plate 19	G06	0.39535	0.391675	-0.003675
orf19.4376	3417		Plate 19	G07	0.414975	0.426025	0.01105
orf19.7629	3352		Plate 19	G08	0.43225	0.395425	-0.036825
orf19.6096	3091	TRP1	Plate 19	G09	0.407325	0.395	-0.012325
orf19.2385	3407	KTI12	Plate 19	G10	0.427375	0.413	-0.014375
orf19.851	3383		Plate 19	G11	0.40915	0.378425	-0.030725
orf19.2496	3436	ATO2	Plate 19	G12	0.44045	0.462825	0.022375
orf19.2391	3406		Plate 19	H01	0.4782	0.467175	-0.011025
orf19.7111	3312		Plate 19	H02	0.4578	0.403075	-0.054725
orf19.457	3381		Plate 19	H03	0.4318	0.433025	0.00122499
orf19.2996	3423		Plate 19	H04	0.525575	0.4766	-0.048975
orf19.6061	3460		Plate 19	H05	0.388475	0.471125	0.08265
orf19.1063	958		Plate 19	H06	0.403875	0.519075	0.1152
orf19.764	2881		Plate 19	H07	0.3171	0.443025	0.125925
orf19.795	2834	VPS36	Plate 19	H08	0.4197	0.515975	0.096275
orf19.4560	2844	BFR1	Plate 19	H09	0.514675	0.4201	-0.094575
orf19.1698	2838		Plate 19	H10	0.461425	0.452475	-0.00895
orf19.3705	1111	PTC6	Plate 19	H11	0.4512	0.407025	-0.044175
orf19.4779	1515		Plate 19	H12	0.4553	0.44985	-0.00545
orf19.2791	2887	BBC1	Plate 20	A01	0.4513	0.374	-0.0773
orf19.2945	3155	PUT4	Plate 20	A02	0.444925	0.3669	-0.078025
orf19.5103	2903		Plate 20	A03	0.426775	0.3653	-0.061475
orf19.4326	2851		Plate 20	A04	0.439725	0.30685	-0.132875
orf19.6956	3227	DAL9	Plate 20	A05	0.441325	0.3614	-0.079925
orf19.5307	3302	JEN2	Plate 20	A06	0.437675	0.37915	-0.058525
orf19.3458	2739		Plate 20	A07	0.464875	0.35855	-0.106325
orf19.2977	3038	MIA40	Plate 20	A08	0.442175	0.3272	-0.114975
orf19.3910	2992		Plate 20	A09	0.471525	0.389975	-0.08155
orf19.1847	3031	ARO10	Plate 20	A10	0.427525	0.347975	-0.07955
orf19.2309	3025		Plate 20	A11	0.431275	0.3987	-0.032575
orf19.5071	3104	NRP1	Plate 20	A12	0.4588	0.356475	-0.102325
orf19.4783	2711		Plate 20	B01	0.4385	0.45935	0.02085
orf19.23	3053	RTA3	Plate 20	B02	0.358275	0.42535	0.067075
orf19.4151	3000	SPO1	Plate 20	B03	0.359225	0.392775	0.03355
orf19.4136	3002	YBL053	Plate 20	B04	0.3744	0.409225	0.034825
orf19.3417	1713	ACF2	Plate 20	B05	0.08585	0.014	-0.07185
orf19.1170	1785	ARO7	Plate 20	B06	0.36515	0.407225	0.042075
orf19.4187	1803		Plate 20	B07	0.359675	0.39175	0.032075
orf19.1160	1751		Plate 20	B08	0.357925	0.38865	0.030725
orf19.5662	3443	PEP7	Plate 20	B09	0.378425	0.374475	-0.00395001
orf19.2942	1834	DIP5	Plate 20	B10	0.35795	0.351725	-0.00622501
orf19.6020	1830		Plate 20	B11	0.363225	0.35835	-0.00487501
orf19.3966	1791	CRH12	Plate 20	B12	0.411375	0.3927	-0.018675
orf19.3689	1827		Plate 20	C01	0.439575	0.38535	-0.054225
orf19.658	3440	GIN1	Plate 20	C02	0.3574	0.354725	-0.002675
orf19.4312	1756		Plate 20	C03	0.402725	0.368325	-0.0344
orf19.4494	1731	KTR2	Plate 20	C04	0.37195	0.35665	-0.0153
orf19.3920	1840		Plate 20	C05	0.367275	0.4314	0.064125
orf19.5228	1689	RIB3	Plate 20	C06	0.374525	0.3805	0.005975
orf19.1159	1750		Plate 20	C07	0.3738	0.405825	0.032025
orf19.5496	2429	AVT1	Plate 20	C08	0.3582	0.372475	0.014275
orf19.2198	2415	FLC3	Plate 20	C09	0.36775	0.37685	0.0091
orf19.2411	2450		Plate 20	C10	0.3602	0.366775	0.00657499
orf19.1449	2068		Plate 20	C11	0.36515	0.369475	0.00432499
orf19.234	1955	PHA2	Plate 20	C12	0.4404	0.4044	-0.036
orf19.983	2021		Plate 20	D01	0.452975	0.4664	0.013425
orf19.6167	1967	AYR1	Plate 20	D02	0.38355	0.379575	-0.003975
orf19.6202	1976	RBT4	Plate 20	D03	0.380675	0.400425	0.01975
orf19.2347	1862	MNN2	Plate 20	D04	0.377875	0.404675	0.0268
orf19.1363	1963		Plate 20	D05	0.36505	0.3824	0.01735
orf19.2197	2416		Plate 20	D06	0.352175	0.37545	0.023275
orf19.1381	2405		Plate 20	D07	0.3906	0.395775	0.005175
orf19.6297	2459		Plate 20	D08	0.38525	0.400525	0.015275
orf19.1832	2408	FCY23	Plate 20	D09	0.401325	0.38235	-0.018975
orf19.6905	2077		Plate 20	D10	0.36845	0.4112	0.04275
orf19.2583	1903	PTR2	Plate 20	D11	0.3908	0.390775	-2.49967e-05
orf19.5789	1923	ADE8	Plate 20	D12	0.445225	0.397475	-0.04775
orf19.5064	1904	MRPL3	Plate 20	E01	0.461375	0.2364	-0.224975
orf19.304	1882		Plate 20	E02	0.35835	0.383	0.02465
orf19.5437	2261	RHR2	Plate 20	E03	0.375225	0.29145	-0.083775
orf19.5906	2315	ADE2	Plate 20	E04	0.3646	0.352475	-0.012125
orf19.3852	1382		Plate 20	E05	0.398025	0.377525	-0.0205
orf19.6464	1377		Plate 20	E06	0.365825	0.38205	0.016225
orf19.2882	1392	XUT1	Plate 20	E07	0.388775	0.39515	0.006375
orf19.1365	1357		Plate 20	E08	0.3951	0.397325	0.00222499
orf19.4229	1321		Plate 20	E09	0.3781	0.386925	0.008825
orf19.4823	1457	LIP6	Plate 20	E10	0.3896	0.39535	0.00575001
orf19.1709	1395		Plate 20	E11	0.384625	0.39155	0.00692501
orf19.1954	2318	PUS4	Plate 20	E12	0.452	0.4498	-0.0022
orf19.1270	2767	FRE3	Plate 20	F01	0.45615	0.384775	-0.071375
orf19.651	2868	LYP1	Plate 20	F02	0.375625	0.38945	0.013825
orf19.2158	2791	NAG3	Plate 20	F03	0.391525	0.385775	-0.00575001
orf19.1504	2869		Plate 20	F04	0.376725	0.378175	0.00145
orf19.3422	3064	FMP27	Plate 20	F05	0.375525	0.3916	0.016075
orf19.1382	2913	YEA4	Plate 20	F06	0.370225	0.37975	0.009525
orf19.1509	2897	ROD1	Plate 20	F07	0.39165	0.369525	-0.022125
orf19.6592	2497		Plate 20	F08	0.39805	0.397175	-0.000875004
orf19.2749	2803		Plate 20	F09	0.3944	0.3857	-0.0087
orf19.1984			Plate 20	F10	0.417625	0.389025	-0.0286
orf19.4079	3744	SLP2	Plate 20	F11	0.40275	0.4	-0.00275001
orf19.841	3777		Plate 20	F12	0.4467	0.440925	-0.005775
orf19.4288	5021	CTA7	Plate 20	G01	0.45695	0.46285	0.00590001
orf19.4236	399	RET2	Plate 20	G02	0.235775	0.153325	-0.08245
orf19.3586	959		Plate 20	G03	0.33855	0.344025	0.005475
orf19.5604	962	MDR1	Plate 20	G04	0.40515	0.396175	-0.00897501
orf19.1853	964	HHT2	Plate 20	G05	0.42505	0.4239	-0.00115
orf19.754	972	YBN5	Plate 20	G06	0.422425	0.400375	-0.02205
orf19.2149	1977		Plate 20	G07	0.419725	0.438025	0.0183
orf19.4519	2975	SUV3	Plate 20	G08	0.47425	0.387075	-0.087175
orf19.6358	2022		Plate 20	G09	0.427875	0.4031	-0.024775
orf19.478	3211		Plate 20	G10	0.4153	0.396475	-0.018825
orf19.4855	1105	BUD31	Plate 20	G11	0.51255	0.446875	-0.065675
orf19.1394	1113		Plate 20	G12	0.461075	0.43605	-0.025025
orf19.3915	1948		Plate 20	H01	0.451875	0.472025	0.02015
orf19.1940	1997		Plate 20	H02	0.48095	0.536825	0.055875
orf19.1849	2000		Plate 20	H03	0.4568	0.4322	-0.0246
orf19.3980	2008		Plate 20	H04	0.42945	0.48615	0.0567
orf19.2984	2015	MST1	Plate 20	H05	0.5234	0.517475	-0.00592498
orf19.1659	2016	ALG8	Plate 20	H06	0.49385	0.498775	0.00492501
orf19.7324	2229	THI13	Plate 20	H07	0.4286	0.38565	-0.04295
orf19.7391	2246	OCH1	Plate 20	H08	0.48295	0.478825	-0.004125
orf19.1078	2347	HBR2	Plate 20	H09	0.4522	0.449875	-0.002325
orf19.656	2350	DPP1	Plate 20	H10	0.4837	0.52855	0.04485
orf19.4339	3742	VPS4	Plate 20	H11	0.49535	0.4444	-0.05095
orf19.1575	1970	PRS1	Plate 20	H12	0.4793	0.45265	-0.02665
orf19.4334	2730	PGA58	Plate 21	A01	0.4394	0.458625	0.019225
orf19.4365	2789		Plate 21	A02	0.450175	0.479775	0.0296
orf19.2160	2792	NAG4	Plate 21	A03	0.435875	0.443425	0.00754999
orf19.4131	2811		Plate 21	A04	0.435575	0.421325	-0.01425
orf19.6595	3088	RTA4	Plate 21	A05	0.447325	0.460125	0.0128
orf19.1559	3124	HOM2	Plate 21	A06	0.44105	0.446725	0.00567499
orf19.5667	3189	MNR2	Plate 21	A07	0.475	0.426075	-0.048925
orf19.769	905	IFE1	Plate 21	A08	0.44745	0.47945	0.032
orf19.3555	909	BUD14	Plate 21	A09	0.467375	0.472675	0.00529999
orf19.2886	919	CEK1	Plate 21	A10	0.44125	0.410625	-0.030625
orf19.1836	920	APN2	Plate 21	A11	0.4255	0.456	0.0305
orf19.517	921	HAP31	Plate 21	A12	0.443575	0.468075	0.0245
orf19.331	2002		Plate 21	B01	0.4421	0.477625	0.035525
orf19.2600	210	SPC98	Plate 21	B02	0.363	0.151675	-0.211325
orf19.4551	912	CTN1	Plate 21	B03	0.40575	0.405625	-0.000124998
orf19.3941	929	URA7	Plate 21	B04	0.448725	0.308025	-0.1407
orf19.4016	930		Plate 21	B05	0.431575	0.336575	-0.095
orf19.3369	931	MOH1	Plate 21	B06	0.398925	0.3989	-2.50116e-05
orf19.4410	49	ALG1	Plate 21	B07	0.413625	0.462875	0.04925
orf19.4473	61	SPC19	Plate 21	B08	0.413125	0.082075	-0.33105
orf19.2298	376	WBP1	Plate 21	B09	0.4555	0.328775	-0.126725
orf19.3037	388		Plate 21	B10	0.463925	0.30805	-0.155875
orf19.2857	459		Plate 21	B11	0.4427	0.153775	-0.288925
orf19.2090	535		Plate 21	B12	0.491425	0.366125	-0.1253
orf19.3086	684		Plate 21	C01	0.39525	0.231825	-0.163425
orf19.1531	693		Plate 21	C02	0.468975	0.200325	-0.26865
orf19.6863	2057	VPH1	Plate 21	C03	0.412075	0.42675	0.014675
orf19.6889	2074	MKK2	Plate 21	C04	0.4391	0.408725	-0.030375
orf19.3641	2757	CAN3	Plate 21	C05	0.39695	0.398175	0.001225
orf19.1033	1585	STR2	Plate 21	C06	0.443525	0.4129	-0.030625
orf19.5530	1552	NAB3	Plate 21	C07	0.415425	0.409375	-0.00605001
orf19.7611	1580	TRX1	Plate 21	C08	0.34615	0.40665	0.0605
orf19.2114	1419		Plate 21	C09	0.405375	0.409775	0.0044
orf19.5006.1	1563		Plate 21	C10	0.40865	0.38835	-0.0203
orf19.3700	1582	TOM70	Plate 21	C11	0.4239	0.38645	-0.03745
orf19.3290	1371		Plate 21	C12	0.38935	0.4089	0.01955
orf19.6988	1543	OST1	Plate 21	D01	0.4529	0.308125	-0.144775
orf19.1586	1437	FGR22	Plate 21	D02	0.43	0.40345	-0.02655
orf19.2755	1530		Plate 21	D03	0.4044	0.323475	-0.080925
orf19.1664	1446		Plate 21	D04	0.440625	0.394	-0.046625
orf19.7594	1289		Plate 21	D05	0.448475	0.391775	-0.0567
orf19.5784	1423	AMO1	Plate 21	D06	0.435775	0.371375	-0.0644
orf19.2461	1430	PRN4	Plate 21	D07	0.428575	0.417375	-0.0112
orf19.3765	1217	RAX2	Plate 21	D08	0.424525	0.3939	-0.030625
orf19.1480	1555		Plate 21	D09	0.397725	0.399575	0.00184999
orf19.5657	1551	SWI1	Plate 21	D10	0.415125	0.292525	-0.1226
orf19.395	1558	ENO1	Plate 21	D11	0.289025	0.063375	-0.22565
orf19.494	1560		Plate 21	D12	0.497175	0.470825	-0.02635
orf19.4822	1458	LIP10	Plate 21	E01	0.474575	0.472175	-0.00239998
orf19.6977	1172	GPI1	Plate 21	E02	0.433575	0.411425	-0.02215
orf19.10	1365	ALK8	Plate 21	E03	0.450375	0.3819	-0.068475
orf19.211	1432		Plate 21	E04	0.448025	0.391125	-0.0569
orf19.5921	1497		Plate 21	E05	0.4377	0.348025	-0.089675
orf19.781	2402	DUR31	Plate 21	E06	0.4568	0.398425	-0.058375
orf19.7002	2595		Plate 21	E07	0.4303	0.380275	-0.050025
orf19.2644	2389	QCR2	Plate 21	E08	0.40885	0.29315	-0.1157
orf19.4325	2372		Plate 21	E09	0.408275	0.38865	-0.019625
orf19.4905	2340		Plate 21	E10	0.432425	0.39905	-0.033375
orf19.428	2520		Plate 21	E11	0.472625	0.412325	-0.0603
orf19.3544	2411		Plate 21	E12	0.46835	0.447575	-0.020775
orf19.2772	2526	HOS3	Plate 21	F01	0.482025	0.52465	0.042625
orf19.444	2521		Plate 21	F02	0.4341	0.371	-0.0631
orf19.4006	2588		Plate 21	F03	0.481325	0.4062	-0.075125
orf19.5553	2403		Plate 21	F04	0.44305	0.408225	-0.034825
orf19.2762	2528	AHP1	Plate 21	F05	0.4259	0.389125	-0.036775
orf19.1797	2418		Plate 21	F06	0.47995	0.407	-0.07295
orf19.866	1190	RAD32	Plate 21	F07	0.43245	0.401975	-0.030475
orf19.4718	1499	TRP5	Plate 21	F08	0.284925	0.41125	0.126325
orf19.5924	1496	ZCF31	Plate 21	F09	0.405325	0.406975	0.00164999
orf19.1911	1220	PGA52	Plate 21	F10	0.380525	0.39135	0.010825
orf19.3230	1175	BOI2	Plate 21	F11	0.4528	0.373425	-0.079375
orf19.2792	1531	IST2	Plate 21	F12	0.47415	0.42135	-0.0528
orf19.3391	1178	ADK1	Plate 21	G01	0.508775	0.472175	-0.0366
orf19.5295	1406		Plate 21	G02	0.5072	0.4334	-0.0738
orf19.7479	1564	NTH1	Plate 21	G03	0.47825	0.423225	-0.055025
orf19.1608	1374		Plate 21	G04	0.536575	0.392975	-0.1436
orf19.2467	1427	PRN1	Plate 21	G05	0.471475	0.409325	-0.06215
orf19.7140	1472		Plate 21	G06	0.3967	0.4056	0.00890001
orf19.4804	1434	LIP2	Plate 21	G07	0.452225	0.42515	-0.027075
[truncated: 360 more rows]

## Sheet: Essential genes
Essential genes
orf19.4815
orf19.6099
orf19.759
orf19.2314
orf19.1031
orf19.7234
orf19.7255
orf19.6217
orf19.6345
orf19.4851
orf19.3761
orf19.7215
orf19.7232
orf19.5278
orf19.6029
orf19.5024
orf19.58
orf19.4754
orf19.4775
orf19.5260
orf19.7261
orf19.3000
orf19.3052
orf19.6010
orf19.3059
orf19.1026
orf19.4817
orf19.5242
orf19.441
orf19.5198
orf19.3013
orf19.3060
orf19.6233
orf19.3348
orf19.1837
orf19.5232
orf19.5106
orf19.4538
orf19.3026
orf19.6039
orf19.3324
orf19.4835
orf19.5229
orf19.6041
orf19.4827
orf19.6057
orf19.2998
orf19.4473
orf19.395
orf19.5081
orf19.3356
orf19.6193
orf19.6259
orf19.2340
orf19.1047
orf19.2940
orf19.1839
orf19.2330
orf19.6213
orf19.6105
orf19.1229
orf19.7264
orf19.4956
orf19.4451
orf19.5226
orf19.4882
orf19.5117
orf19.4809
orf19.6034
orf19.2929
orf19.406
orf19.4930
orf19.4993
orf19.6355
orf19.3681
orf19.2967
orf19.7222
orf19.4967
orf19.6340
orf19.5085
orf19.4732
orf19.3031
orf19.5027
orf19.3027
orf19.5008.1
orf19.4931
orf19.3334
orf19.3304
orf19.3054
orf19.3673
orf19.3347
orf19.7236
orf19.401
orf19.4724
orf19.2960
orf19.680
orf19.2002
orf19.5360
orf19.3593
orf19.1915
orf19.1591
orf19.3560
orf19.1491
orf19.2283
orf19.1528
orf19.144
orf19.3540
orf19.4093
orf19.1460
orf19.2105
orf19.5801
orf19.5358
orf19.2040
orf19.2288
orf19.801
orf19.1878
orf19.1574
orf19.3553
orf19.1896
orf19.3551
orf19.1352
orf19.1361
orf19.5346
orf19.2267
orf19.1386
orf19.2019
orf19.2055
orf19.837
orf19.1478
orf19.5493
orf19.3575
orf19.1378
orf19.6886
orf19.1575
orf19.1531
orf19.2112
orf19.2090
orf19.1923
orf19.1446
orf19.3532
orf19.863
orf19.2215
orf19.2013
orf19.2233
orf19.5779
orf19.5487
orf19.1902
orf19.1548
orf19.213
orf19.1402
orf19.1883
orf19.900
orf19.1457
orf19.5833
orf19.3623
orf19.4492
orf19.5835
orf19.6881
orf19.5363
orf19.1570
orf19.4120
orf19.2187
orf19.1901
orf19.4499
orf19.1601
orf19.3564
orf19.5351
orf19.2214
orf19.5793
orf19.3590
orf19.2093
orf19.1885
orf19.275
orf19.6171
orf19.5912
orf19.2504
orf19.6820
orf19.7384
orf19.1672
orf19.5947
orf19.1633
orf19.5959
orf19.325
orf19.239
orf19.6163
orf19.1618
orf19.5873
orf19.5444
orf19.6742
orf19.329
orf19.7454
orf19.6175
orf19.1661
orf19.5407
orf19.6190
orf19.5440
orf19.5991
orf19.1649
orf19.5964
orf19.5463
orf19.5949
orf19.6155
orf19.6176
orf19.5383
orf19.5885
orf19.5378
orf19.337
orf19.7438
orf19.269
orf19.3129
orf19.2712
orf19.2884
orf19.6862
orf19.1267.1
orf19.4640
orf19.4616
orf19.4585
orf19.1250
orf19.3367
orf19.4176
orf19.1248
orf19.2709
orf19.2675
orf19.2717
orf19.4625
orf19.3123
orf19.2735
orf19.2917
orf19.4705
orf19.3086
orf19.5297
orf19.1251
orf19.3126
orf19.3846
orf19.4704
orf19.2629
orf19.3098
orf19.2760
orf19.4635
orf19.3130
orf19.4577.3
orf19.4620
orf19.1792
orf19.2736
orf19.2885
orf19.2775
orf19.4681
orf19.2687.1
orf19.4659
orf19.4168
orf19.3103
orf19.5039
orf19.4190
orf19.1299
orf19.2720
orf19.4628
orf19.4618
orf19.4582
orf19.3116
orf19.4606
orf19.5647
orf19.1975
orf19.3178
orf19.585
orf19.978
orf19.4299
orf19.1966
orf19.5685
orf19.4032
orf19.3206
orf19.5692
orf19.4223
orf19.567
orf19.4146
orf19.979
orf19.4326
orf19.4236
orf19.3941
orf19.4219
orf19.3161
orf19.4029
orf19.3168
orf19.3955
orf19.4336
orf19.5693
orf19.4152
orf19.3174
orf19.4004
orf19.955
orf19.969
orf19.964
orf19.3962
orf19.5682
orf19.2643
orf19.1945
orf19.1280
orf19.579
orf19.4030
orf19.4268
orf19.4003
orf19.3938
orf19.3951
orf19.4221
orf19.4025
orf19.4194
orf19.4192
orf19.1199
orf19.3467
orf19.3465
orf19.1084
orf19.3474
orf19.4205.1
orf19.5551
orf19.3496
orf19.117
orf19.3409
orf19.5608
orf19.1077
orf19.5577
orf19.5765
orf19.5746
orf19.5623
orf19.3478
orf19.5732
orf19.5513
orf19.5526
orf19.688
orf19.76
orf19.7041
orf19.7119
orf19.6515
orf19.7062
orf19.6537
orf19.7178
orf19.7057
orf19.7197
orf19.6541
orf19.5163
orf19.5143
orf19.5188
orf19.7081
orf19.6511
orf19.7011
orf19.5184
orf19.6539
orf19.7154
orf19.6524
orf19.2847
orf19.1815
orf19.4382
orf19.1986
orf19.4371
orf19.1988
orf19.6652
orf19.7581
orf19.603
orf19.544.1
orf19.2611
orf19.485
orf19.7620
orf19.7308
orf19.7488
orf19.7599
orf19.501
orf19.2560
orf19.172
orf19.708
orf19.6312
orf19.7673
orf19.6648
orf19.2425.2
orf19.7312
orf19.7605
orf19.7285
orf19.6437
orf19.5850
orf19.7286
orf19.7569
orf19.482
orf19.491
orf19.7615
orf19.717
orf19.6375
orf19.2573
orf19.7483
orf19.2862
orf19.2563
orf19.2600
orf19.2857
orf19.916
orf19.2594
orf19.2386
orf19.3240
orf19.2622
orf19.2397
orf19.3704
orf19.6438
orf19.709
orf19.2407
orf19.6432
orf19.7529
orf19.7655
orf19.4367
orf19.6649
orf19.7335
orf19.7293
orf19.3856
orf19.3888
orf19.2571
orf19.5846
orf19.4373
orf19.171
orf19.4374
orf19.2528
orf19.488
orf19.512
orf19.2843
orf19.596.1
orf19.3867
orf19.2831
orf19.3862
orf19.7563
orf19.6314
orf19.7634
orf19.3276
orf19.7618
orf19.2518
orf19.6642
orf19.528
orf19.7644

## Sheet: 29 selected genes
GENES	Plate	Common	Feature type	Description (CGD)
orf19.150	P7-F10	TIM17	ORF|Uncharacterized	Predicted component of the Translocase of the Inner Mitochondrial membrane (TIM23 complex), involved in protein import into mitochondria
orf19.418	P2-A7	KOG1	ORF|Uncharacterized	Putative TORC1 subunit; heterozygous null mutant displays sensitivity to rapamycin; likely to be essential for growth, based on an insertional mutagenesis strategy
orf19.922	P10-A8	ERG11	ORF|Verified	Lanosterol 14-alpha-demethylase; cytochrome P450 family; role in ergosterol biosynthesis; target of azole antifungals; may contribute to drug resistance; azole or flow model biofilm induced; drug treated biofilm induced; hypoxia regulated
orf19.1833	P14-B12	orf19.1833	ORF|Uncharacterized	Ortholog(s) have mRNA binding, pseudouridine synthase activity
orf19.1960	P18-F9	CLN3	ORF|Verified	G1 cyclin; depletion abolishes budding and causes hyphal growth defects; farnesol regulated, functional in S. cerevisiae; possibly essential (UAU1 method); other biofilm induced; Spider biofilm induced
orf19.2307	P9-H1	orf19.2307	ORF|Uncharacterized	Ortholog(s) have role in mRNA polyadenylation, pre-mRNA cleavage required for polyadenylation and cytosol, mRNA cleavage and polyadenylation specificity factor complex, nuclear chromatin localization
orf19.2417	P15-E3	SMC5	ORF|Verified	Protein similar to S. cerevisiae Smc5p, which is involved in DNA repair; transposon mutation affects filamentous growth
orf19.2688	P15-F2	NAN1	ORF|Verified	Putative U3 snoRNP protein; Hap43p-induced gene; physically interacts with TAP-tagged Nop1p
orf19.3341	P2-A5	orf19.3341	ORF|Uncharacterized	Putative tRNA-Arg synthetase; essential; genes encoding ribosomal subunits, translation factors, and tRNA synthetases are downregulated upon phagocytosis by murine macrophage; downregulated by growth in the mouse cecum
orf19.3462	P23-A4	SAR1	ORF|Verified	Functional homolog of S. cerevisiae Sar1; which is required for ER-to-Golgi protein transport; binds GTP; similar to small GTPase superfamily proteins; gene has intron; Hap43-induced; rat catheter biofilm repressed
orf19.4078	P15-C11	orf19.4078	ORF|Uncharacterized	Ortholog(s) have role in U1 snRNA 3'-end processing, U4 snRNA 3'-end processing and U5 snRNA 3'-end processing, more
orf19.4497	P16-D11	MED8	ORF|Uncharacterized	Ortholog(s) have RNA polymerase II core promoter proximal region sequence-specific DNA binding, RNA polymerase II transcription corepressor activity, TBP-class protein binding, structural molecule activity
orf19.4799	P7-G10	CEF1	ORF|Uncharacterized	Putative mRNA splicing factor; ortholog is essential in S. cerevisiae; Spider biofilm induced
orf19.6702	P10-F1	DED81	ORF|Uncharacterized	Putative tRNA-Asn synthetase; genes encoding ribosomal subunits, translation factors, tRNA synthetases are downregulated upon phagocytosis by murine macrophage; protein enriched in stationary phase yeast cultures
orf19.6909	P9-G10	MED11	ORF|Uncharacterized	Subunit of the RNA polymerase II mediator complex
orf19.6931	P10-A4	orf19.6931	ORF|Verified	Putative cleavage factor I subunit; heterozygous null mutant exhibits hypersensitivity to parnafungin and cordycepin in the C. albicans fitness test
orf19.7141	P10-B1	UFE1	ORF|Verified	Protein interacting with Sec20p, possibly involved in retrograde transport between the Golgi and the endoplasmic reticulum; functional homolog of S. cerevisiae Ufe1p, which is an ER t-SNARE that mediates the retrograde traffic
orf19.6151	P1-B12	ARC15	ORF|Verified	Putative ARP2/3 complex subunit; mutation confers hypersensitivity to cytochalasin D
orf19.1111	P16-D12	orf19.1111	ORF|Uncharacterized	Ortholog(s) have chromatin binding, protein complex scaffold activity and role in RNA polymerase II transcriptional preinitiation complex assembly, histone acetylation
orf19.2830	P16-A1	RRP9	ORF|Verified	Ribosomal protein; mutation confers resistance to 5-fluorocytosine (5-FC), 5-fluorouracil (5-FU), and tubercidin (7-deazaadenosine); physically interacts with TAP-tagged Nop1; Hap43-induced; Spider biofilm induced
orf19.1164	P11-E8	GAR1	ORF|Verified	Putative H/ACA snoRNP pseudouridylase complex protein; mutation confers hypersensitivity to tubercidin (7-deazaadenosine); macrophage/pseudohyphal-induced; Spider biofilm repressed
orf19.6014	P1-F7	RRS1	ORF|Verified	Putative ribosome biogenesis and nuclear export protein; Hap43p-induced gene; mutation confers hypersensitivity to 5-fluorocytosine (5-FC), 5-fluorouracil (5-FU), and tubercidin (7-deazaadenosine)
orf19.1631	P1-H4	ERG6	ORF|Verified	Delta(24)-sterol C-methyltransferase, converts zymosterol to fecosterol, ergosterol biosynthesis; mutation confers nystatin resistance; Hap43, GlcNAc-, fluconazole-induced; upregulated in azole-resistant strain; Spider biofilm repressed
orf19.2437	P8-E4	ARC35	ORF|Verified	Putative ARP2/3 complex subunit; shows colony morphology-related gene regulation by Ssn6p; mutation confers hypersensitivity to cytochalasin D
orf19.4427	P1-C10	SKP1	ORF|Uncharacterized	Putative subunit D of kinetochore protein complex CBF3; regulated by Gcn4p; repressed in response to amino acid starvation (3-aminotriazole treatment)
orf19.5061	P7-A8	ADE5,7	ORF|Verified	Phosphoribosylamine-glycine ligase and phosphoribosylformylglycinamidine cyclo-ligase; interacts with Vps34p; required for hyphal growth and virulence; flucytosine induced; not induced in GCN response, in contrast to S. cerevisiae ortholog
orf19.3873	P7-H10	ARC40	ORF|Verified	Protein similar to S. cerevisiae Arc40; involved in actin filament organization in S. cerevisiae; transposon mutation affects filamentous growth; rat catheter and Spider biofilm repressed
orf19.2438	P18-A7	orf19.2438	ORF|Uncharacterized	Ortholog(s) have mitochondrion, ribosome localization
orf19.2138	P15-E12	ILS1	ORF|Uncharacterized	Putative isoleucyl-tRNA synthetase, the target of drugs including the cyclic beta-amino acid icofungipen/PLD-118/BAY-10-8888 and mupirocin; protein present in exponential and stationary growth phase yeast cultures
