# Supplementary material for: Screening of Candida albicans GRACE library revealed a unique pattern of biofilm formation under repression of the essential gene ILS1
Source: Sci Rep. 2019 Jun 24;9:9187. doi: 10.1038/s41598-019-45624-y (PMC6591175; doi:10.1038/s41598-019-45624-y)
Supplement: Supplementary file 3 — Dataset 3 [file 41598_2019_45624_MOESM3_ESM.xlsx]

## Sheet: aatRNA-synthetases
aa Trna-synthetase genes	Name	ORF	Feature	ILS1biofilmVSWTbiofilm	WTbiofilmVSWTplanktonic
alanine-Trna ligase activity	ALA1, CA1427	orf19.5746	C6_03720W_A	0.377448	-1.26
	CA5007	orf19.5239	C1_12240C_A	-0.264619	-2.21
arginine- Trna ligase activity	CA2720	orf19.3341	C1_01530C_A	1.11	-1.69
asparagine-Trna ligase activity	DED81, CA4302	orf19.6702	C7_03670W_A	0.87427	-2.76
	CA4299	orf19.6698	C7_03640C_A	-0.204045	-0.61
aspartate-Trna ligase activity	DPS1-1, CA3052	orf19.2407	CR_03170W_A	0.874173	-2.74
	CA2415	orf19.4478	C1_04030W_A	-0.0326734	-1.92
cysteine-Trna ligase activity	CA3601	orf19.4931	C1_13030C_A	0.712595	-2.15
glutamate-Trna ligase activity	GUS1, CA5638	orf19.7057	C7_00620W_A	1.47	-3.11
	CA0004	orf19.2415	CR_03110W_A	0.0265713	-1.53
glutamine-Trna ligase activity	GLN4, CA5631	orf19.7064	C7_00550C_A	0.39261	-1.18
glycine-Trna ligase activity	GRS1, CA4060	orf19.437	C1_05290W_A	0.586677	-1.63
histidine-Trna ligase activity	HTS1, CA2494	orf19.4051	C5_05490C_A	NOT FOUND
isoleucine-tRNA ligase activity	ILS1, CA3186	orf19.2138	C6_04520W_A	-2.97	-2.01
	CA2103	orf19.2382	CR_03400W_A	1.14994	-1.96
leucine-Trna ligase activity	CDC60, CA2060	orf19.2560	CR_01690C_A	0.97	-2.39
	NAM2, CA2656	orf19.5705	C6_03450C_A	0.715051	-1.41
lysine-Trna ligase activity	KRS1, CA5947	orf19.6749	C3_07410C_A	0.576767	-1.44
	MSK1, CA4944	orf19.6533	C7_01870W_A	0.189785	-0.5
methionine- Trna ligase activity	MES1, CA1014	orf19.3955	C5_04700C_A	0.152198	-1.7
	MSM1, CA1093	orf19.3950	C5_04650C_A	0.0452515	-0.16
phenylalanine- Trna ligase activity	FRS1, CA2682	orf19.2573	CR_01760C_A	0.925923	-2.6
	FRS2, CA4173	orf19.2960	C1_02710W_A	1.14949	-2.74
	MSF1, CA3648	orf19.2039	C2_00850W_A	0.767364	-2.04
proline- Trna ligase activity	PRS1, CA1074	orf19.2532	CR_01480W_A	-0.15793	-0.05
	CA2098	orf19.2387	CR_03350C_A	0.5671	-1.03
	CA4301	orf19.6701	C7_03660C_A	0.370054	-1.69
serine- Trna ligase activity	SES1, CA1598	orf19.269	C3_02780W_A	0.91	-1.7
	CA1436	orf19.1201	C6_00390W_A	-0.409158	-0.19
threonine- Trna ligase activity	MST1, CA3441	orf19.2984	C1_02930C_A	1.16021	-2.33
	THS1, CA2608	orf19.5685	C5_00110C_A	0.622463	-1.66
tryptophan-Trna ligase activity	MSW1, CA2636	orf19.4299	C5_02770W_A	-0.916395	-0.29
	WRS1, CA1973	orf19.5226	C1_12380C_A	0.833569	-3.02
tyrosine-Trna ligase activity	CA1193	orf19.109	C6_01050W_A	-0.0293148	-0.89
	TYS1, CA3261	orf19.2694	C4_02980W_A	0.513241	-1.99
valine-Trna ligase activity	VAS1, CA0223	orf19.1295	C2_06640C_A	0.433993	-1.58

## Sheet: UP in ILS1biofilm
Feature	ORF	Name	Description	Feature type	baseMean	log2FoldChange	lfcSE	stat	pvalue	padj
C3_07920W_A	orf19.6187		possible pseudouridine monophosphate glycosidase; overlaps orf19.6185 and orf19.618; has intron; Spider biofilm repressed (5, 6)	ORF, Uncharacterized	144.66	10.7	1.47	7.26	3.8075e-13	1.26489e-11
C2_09530W_A	orf19.1401	EAP1	GPI-anchored cell wall adhesin; Efg1-regulated; mutant suppresses cell adhesion, filamentation, invasive growth defects of S. cerevisiae flo8 or flo11 mutant; biofilm induced; required for biofilm formation; Bcr1-repressed in a/a biofilms (1, 6, 7, 8, 9)	ORF, Verified	53.45	9.27	1.52	6.1	1.07027e-09	2.19643e-08
C1_00470C_A	orf19.6061		Ortholog(s) have role in N-acylethanolamine metabolic process, N-acylphosphatidylethanolamine metabolic process and integral component of mitochondrial inner membrane localization (5)	ORF, Uncharacterized	42.89	8.95	1.54	5.82	5.81244e-09	1.08879e-07
C4_01330W_A	orf19.4654		Protein of unknown function; Spider biofilm induced (5)	ORF, Dubious	21.57	7.96	1.63	4.9	9.78612e-07	1.26275e-05
C4_01340W_A	orf19.4653		Protein similar to GPI-linked cell-wall proteins; induced in low iron; Spider biofilm induced; regulated in Spider biofilms by Bcr1, Tec1, Ndt80, Brg1 (5, 6)	ORF, Uncharacterized	76.66	6.32	0.83	7.62	2.6236e-14	1.06592e-12
C2_04460W_A	orf19.4506	LYS22	Homocitrate synthase, minor isoform; repressed by nitric oxide and by hypoxia; protein level decreases in stationary phase cultures; induced by ketoconazole, Spider biofilm induced; flow model biofilm repressed (6, 7, 8, 9, 10, 11)	ORF, Verified	389.86	5.26	0.3	17.3	4.82823e-67	7.25803e-64
CR_08510W_A	orf19.6420	PGA13	GPI-anchored cell wall protein involved in cell wall synthesis; required for normal cell surface properties; induced in oralpharyngeal candidasis; Spider biofilm induced; Bcr1-repressed in RPMI a/a biofilms (1, 6, 7, 8, 9)	ORF, Verified	361.53	4.6	0.95	4.82	1.43084e-06	1.76667e-05
C2_01270W_A	orf19.1996	CHA1	Similar to catabolic ser/thr dehydratases; repressed by Rim101; induced in low iron; regulated on white-opaque switch; filament induced; Tn mutation affects filamentation; flow model biofilm induced; Spider biofilm repressed (1, 5, 6, 7, 8, 9, 10, 11)	ORF, Verified	165.11	4.24	0.39	10.82	2.67237e-27	3.82594e-25
C3_06580W_A	orf19.7447	JEN1	Lactate transporter; induced by lactic acid, activated by Cat8; alkaline repressed by Rim101; localizes to plasma membrane; Spider biofilm induced (1, 6, 7, 8)	ORF, Verified	1142.27	4.21	0.19	21.62	1.09567e-103	6.58828e-100
C4_02900C_A	orf19.2706	CRH11	GPI-anchored cell wall transglycosylase, putative ortholog of S. cerevisiae Crh1p; predicted glycosyl hydrolase domain; similar to Csf4p and to antigenic A. fumigatus Aspf9; predicted Kex2p substrate; caspofungin-induced (1, 5, 6, 7, 8, 9, 10, 11)	ORF, Verified	369.5	3.91	0.27	14.71	5.23174e-49	3.14584e-46
C3_03440C_A	orf19.341		Putative spermidine export pump; fungal-specific (no human or murine homolog)	ORF, Verified	247.81	3.88	0.3	12.76	2.6335e-37	6.88488e-35
CR_06500C_A	orf19.716		Protein of unknown function; Hap43-induced; regulated by Nrg1, Tup1; repressed by alpha pheromone in SpiderM medium; Spider biofilm induced; Bcr1-repressed in RPMI a/a biofilms (5, 6, 7, 8, 9)	ORF, Uncharacterized	339.14	3.87	0.27	14.09	4.29093e-45	1.84295e-42
C6_00330C_A	orf19.1193	GNP1	Similar to asparagine and glutamine permease; fluconazole, caspofungin induced; regulated by Nrg1, Mig1, Tup1, Gcn2, Gcn4, and alkaline regulated by Rim101; repressed during chlamydospore formation; rat catheter, flow model biofilm induced (2, 7, 8, 9, 10, 11, 12)	ORF, Uncharacterized	7192.83	3.83	0.74	5.18	2.17538e-07	3.15956e-06
C1_06370C_A	orf19.6274	PBR1	Protein of unknown function; required for cohesion, adhesion, and RPMI biofilm formation; induced by alpha pheromone in white cells; fluconazole-induced; Spider biofilm induced (1, 6, 7)	ORF, Verified	61.57	3.59	0.57	6.32	2.55987e-10	5.8305e-09
CR_01400W_A	orf19.2525	LYS12	Homoisocitrate dehydrogenase; catalyzes 4th step in the alpha-aminoadipate pathway of lysine biosynthesis; clade-associated gene expression; protein level decreases in stationary phase cultures; Spider biofilm repressed (6, 7, 8, 9, 10)	ORF, Verified	290.44	3.46	0.27	12.79	1.77478e-37	4.8508e-35
C1_11700C_A	orf19.1149	MRF1	Putative mitochondrial respiratory protein; induced by farnesol, benomyl, nitric oxide, core stress response; oxidative stress-induced via Cap1; stationary-phase enriched protein; Spider biofilm induced (1, 6, 7, 8, 9, 10, 11)	ORF, Uncharacterized	105.29	3.42	0.45	7.6	2.89313e-14	1.15976e-12
C4_02990C_A	orf19.2693	GST2	Glutathione S transferase; induced by benomyl and in populations of cells exposed to fluconazole over multiple generations; regulated by Nrg1, Tup1; induced by nitric oxide; stationary phase enriched; Spider biofilm induced (2, 7, 8, 9, 10, 11, 12, 13)	ORF, Verified	69.82	3.39	0.57	5.93	2.95023e-09	5.74101e-08
CR_06580W_A	orf19.693		Protein of unknown function; Spider biofilm induced; rat catheter biofilm repressed (5, 6)	ORF, Uncharacterized	41.22	3.12	0.63	4.94	7.99198e-07	1.04925e-05
C2_09220W_A	orf19.4082	DDR48	Immunogenic stress-associated protein; filamentation regulated; induced by benomyl/caspofungin/ketoconazole or in azole-resistant strain; Hog1, farnesol, alkaline repressed; stationary phase enriched; Spider, flow model biofilm induced (1, 6, 7, 8, 9, 10, 11, 12, 13, 14)	ORF, Verified	360.13	3.12	0.24	13.05	6.71688e-39	2.24381e-36
C1_13450W_A	orf19.4975	HYR1	GPI-anchored hyphal cell wall protein; macrophage-induced; repressed by neutrophils; resistance to killing by neutrophils, azoles; regulated by Rfg1, Efg1, Nrg1, Tup1, Cyr1, Bcr1, Hap43; Spider and flow model biofilm induced (1, 2, 7, 8, 9, 10, 11, 12, 13, 14, 15, 16,	ORF, Verified	91.67	3.03	0.5	6.04	1.56498e-09	2.52461e-08
C1_13940W_A	orf19.5032	SIM1	Adhesin-like protein; involved in cell wall maintenance, redundant with Sun41; possibly secreted; macrophage-repressed; repressed by Rim101, Cyr1, Ras1; Spider biofilm induced (7, 8, 9, 10, 11, 12, 13, 14)	ORF, Verified	1877.35	2.97	0.15	20.19	1.11249e-90	3.34469e-87
C1_10450W_A	orf19.986	GLY1	L-threonine aldolase; complements glycine auxotrophy of S. cerevisiae shm1 shm2 gly1-1 triple mutant; macrophage/pseudohyphal-induced; the GLY1 locus has an RFLP and is triploid in strain SGY269; flow model biofilm induced (1, 6, 7)	ORF, Verified	1823.41	2.96	0.41	7.17	7.50435e-13	2.40019e-11
C4_07090C_A	orf19.3099	TRP4	Predicted enzyme of amino acid biosynthesis; upregulated in biofilm; regulated by Gcn2p and Gcn4p; S. cerevisiae ortholog is Gcn4p regulated (1, 6)	ORF, Uncharacterized	75.82	2.94	0.46	6.43	1.29706e-10	3.11969e-09
C2_07350W_A	orf19.1901	MCM3	Putative DNA replication protein; periodic mRNA expression, peak at cell-cycle M/G1 phase; Spider biofilm induced (6, 7)	ORF, Uncharacterized	450.26	2.88	0.24	12.11	9.59687e-34	2.30824e-31
C2_00680C_A	orf19.2060	SOD5	Cu-containing superoxide dismutase; protects against oxidative stress; induced by neutrophils, hyphal growth, caspofungin, osmotic/oxidative stress; oralpharyngeal candidiasis induced; rat catheter and Spider biofilm induced (1, 7, 8, 9, 10, 11, 12, 13, 14)	ORF, Verified	133.03	2.88	0.41	6.97	3.16527e-12	9.37574e-11
C5_02790C_A	orf19.4304	GAP1	Amino acid permease; antigenic in human/mouse; 10-12 transmembrane regions; regulated by nitrogen source; alkaline, GlcNAc, phagocytosis induced; WT virulence in mice; Spider and flow model biofilm induced (6, 7, 8, 9, 10, 11, 12, 13, 14, 15)	ORF, Verified	125.76	2.88	0.37	7.77	8.15694e-15	3.58012e-13
C7_02030W_A	orf19.6515	HSP90	Essential chaperone, regulates several signal transduction pathways and temperature-induced morphogenesis; activated by heat shock, stress; localizes to surface of hyphae, not yeast cells; mediates echinocandin and biofilm azole resistance (6, 7, 8, 9, 10, 11, 12, 13, 14, 15, 16, 17)	ORF, Verified	1436.94	2.86	0.16	17.44	4.25252e-68	8.52347e-65
C4_00650W_A	orf19.4177	HIS5	Putative histidinol-phosphate aminotransferase; Gcn4p-regulated; protein present in exponential and stationary growth phase yeast cultures (1, 5)	ORF, Uncharacterized	149.54	2.84	0.35	8.11	4.86872e-16	2.36094e-14
C4_03570W_A	orf19.1321	HWP1	Hyphal cell wall protein; host transglutaminase substrate; opaque-, a-specific, alpha-factor induced; at MTLa side of conjugation tube; virulence complicated by URA3 effects; Bcr1-repressed in RPMI a/a biofilms; Spider biofilm induced (1, 7, 8, 9, 10, 11, 12, 13, 14, 15)	ORF, Verified	95.63	2.72	0.45	6.01	1.88371e-09	3.7382e-08
C1_11660W_A	orf19.1153	GAD1	Putative glutamate decarboxylase; alkaline, macrophage-downregulated gene; amphotericin B induced; induced by Mnl1 under weak acid stress; stationary phase enriched protein; rat catheter biofilm repressed (1, 6, 7, 8, 9, 10)	ORF, Uncharacterized	143.84	2.66	0.34	7.92	2.4608e-15	1.13821e-13
C4_03380C_A	orf19.3365	DAO2	Putative D-amino acid oxidase; rat catheter biofilm induced (5)	ORF, Uncharacterized	71.64	2.64	0.47	5.63	1.78054e-08	3.1397e-07
C2_06250C_A	orf19.5487	CDC46	Putative hexameric MCM complex subunit; predicted role in control of cell division; periodic mRNA expression. peak at cell-cycle M/G1 phase; regulated by tyrosol, cell density, Plc1; repressed by alpha pheromone in SpiderM medium (1, 2, 7, 8)	ORF, Uncharacterized	121.74	2.6	0.36	7.27	3.51376e-13	1.17379e-11
C1_04020C_A	orf19.4477	CSH1	Aldo-keto reductase; role in fibronectin adhesion, cell surface hydrophobicity; regulated by temperature, growth phase, benomyl, macrophage interaction; azole resistance associated; Spider biofilm induced; rat catheter biofilm repressed (1, 5, 6, 7, 8, 9, 10)	ORF, Verified	177.72	2.58	0.38	6.82	9.32411e-12	2.58368e-10
C5_00450C_A	orf19.944	IFG3	Putative D-amino acid oxidase; Spider biofilm induced (5)	ORF, Uncharacterized	203.81	2.58	0.34	7.67	1.70733e-14	7.2297e-13
C7_02380C_A	orf19.6472	CYP1	Peptidyl-prolyl cis-trans isomerase; cyclosporin A sensitive activity; soluble in hyphae; biofilm induced, macrophage-induced protein; downregulated upon treatment of biofilm with farnesol; present in exponential and stationary phase cells (1, 2, 3, 9, 10, 11)	ORF, Verified	609.6	2.58	0.18	13.97	2.34986e-44	9.41979e-42
C1_10800C_A	orf19.2337	ALP1	Cystine transporter; present in pathogenic yeasts (no human or murine homolog); Spider biofilm induced (3, 7)	ORF, Verified	71.59	2.56	0.46	5.54	3.05291e-08	5.21511e-07
CR_06460W_A	orf19.720	GST3	Glutathione S-transferase; expression regulated upon white-opaque switch; induced by human neutrophils; peroxide-induced; induced by alpha pheromone in SpiderM medium; Spider biofilm induced (1, 6, 7, 8, 9)	ORF, Uncharacterized	124.6	2.47	0.35	7.02	2.21801e-12	6.70197e-11
C5_01090C_A	orf19.1961		Planktonic growth-induced gene (5)	ORF, Uncharacterized	244.12	2.43	0.27	8.95	3.65941e-19	2.44489e-17
CR_05790C_A	orf19.6632	ACO2	Putative aconitate hydratase 2; induced in high iron; regulated by Gcn4; repressed by amino acid starvation (3-AT); protein levels decrease in stationary phase yeast; flow model and Spider biofilm repressed (1, 5, 6, 7, 8)	ORF, Uncharacterized	386.08	2.43	0.24	10.29	7.68505e-25	8.88658e-23
C1_13480W_A	orf19.4980	HSP70	Putative hsp70 chaperone; role in entry into host cells; heat-shock, amphotericin B, cadmium, ketoconazole-induced; surface localized in yeast and hyphae; antigenic in host; farnesol-downregulated in biofilm; Spider biofilm induced (1, 7, 8, 9, 10, 11, 12, 13, 14, 15, 16)	ORF, Verified	2697.21	2.4	0.14	16.69	1.51772e-62	1.82521e-59
C1_13070C_A	orf19.4933	FAD3	Omega-3 fatty acid desaturase; production of alpha-linolenic acid, a major component of membranes; caspofungin induced; Plc1-regulated; colony morphology-related gene regulation by Ssn6; Spider biofilm induced, flow model biofilm repressed (1, 6, 7, 8, 9, 10)	ORF, Verified	206.69	2.35	0.3	7.93	2.16541e-15	1.00935e-13
C1_05110C_A	orf19.4060	ARO4	3-deoxy-D-arabinoheptulosonate-7-phosphate synthase; aromatic amino acid biosynthesis; GCN-regulated; feedback-inhibited by tyrosine if produced in S. cerevisiae Aro3p and Aro4p catalyze same reaction; protein decreases in stationary phase (1, 6, 7, 8)	ORF, Verified	419.55	2.35	0.22	10.49	9.63117e-26	1.2065e-23
CR_02110W_A	orf19.2611	MCM6	Putative MCM DNA replication initiation complex component; mRNA expression peak at cell-cycle M/G1 phase; regulated by tyrosol and cell density; repressed by alpha pheromone in SpiderM medium; Hap43-induced gene (1, 6, 7, 8)	ORF, Uncharacterized	161.06	2.32	0.31	7.49	6.74369e-14	2.51862e-12
C3_06180C_A	orf19.7417	TSA1	TSA/alkyl hydroperoxide peroxidase C (AhPC) family protein; similar to thiol-dependent peroxidases of oxidative stress signaling; antigenic; hyphal surface, nucleus; yeast-form nucleus, cytoplasm; biofilm, phagocytosis, peroxide induced (1, 3, 6, 7, 8, 9, 10, 11, 12)	ORF, Verified	116.18	2.32	0.41	5.67	1.46223e-08	2.60903e-07
C2_06460W_A	orf19.23	RTA3	7-transmembrane receptor protein involved in regulation of asymmetric lipid distribution in plasma membrane; involved in biofilm formation; putative drug-responsive regulatory site; rat catheter biofilm induced (1, 6, 7, 8, 9, 10, 11, 12, 13)	ORF, Verified	191.48	2.3	0.29	7.88	3.18236e-15	1.46073e-13
C4_01550C_A	orf19.4630	CPA1	Putative carbamoyl-phosphate synthase subunit; alkaline repressed; rat catheter, Spider and flow model biofilm induced (1, 6, 7)	ORF, Uncharacterized	208.24	2.3	0.28	8.15	3.75511e-16	1.86607e-14
C2_02030W_A	orf19.1517	ARO3	3-deoxy-D-arabinoheptulosonate-7-phosphate synthase; aromatic amino acid synthesis; GCN-regulated; feedback-inhibited by phe if expressed in S. cerevisiae; decreased in stationary phase; flow model biofilm repressed (1, 5, 6, 7, 8)	ORF, Verified	275.23	2.26	0.25	9.03	1.67843e-19	1.24771e-17
C1_12030W_A	orf19.5263	SER33	Predicted enzyme of amino acid biosynthesis; Gcn4p-regulated; upregulated in biofilm; protein present in exponential and stationary growth phase yeast cultures; S. cerevisiae ortholog is Gcn4p regulated (1, 6, 7)	ORF, Uncharacterized	264.78	2.21	0.29	7.53	4.93307e-14	1.92614e-12
CR_00080W_A	orf19.7534	MIS12	Mitochondrial C1-tetrahydrofolate synthase precursor (1)	ORF, Uncharacterized	525.07	2.2	0.21	10.5	8.48416e-26	1.08543e-23
C6_01070C_A	orf19.113	CIP1	Possible oxidoreductase; transcript induced by cadmium but not other heavy metals, heat shock, yeast-hypha switch, oxidative stress (via Cap1), or macrophage interaction; stationary phase enriched protein; Spider biofilm induced (1, 7, 8, 9, 10, 11)	ORF, Verified	95.94	2.15	0.4	5.36	8.13825e-08	1.27768e-06
C2_09020W_A	orf19.202	CDC47	Phosphorylated protein described as having role in control of cell division; RNA abundance regulated by tyrosol and cell density; merged with orf19.201 in Assembly 20; unmerged from orf19.201 in a revision of Assembly 21 (1, 5, 6, 7, 8)	ORF, Uncharacterized	207.09	2.15	0.28	7.6	2.86928e-14	1.15792e-12
CR_05390W_A	orf19.5285	PST3	Flavodoxin-like protein involved in oxidative stress protection and virulence; YNB biofilm induced; stationary phase enriched protein; rat catheter and Spider biofilm repressed (5, 6, 7, 8, 9, 10)	ORF, Verified	91.7	2.11	0.42	5.02	5.197e-07	7.05407e-06
C1_04470C_A	orf19.6840		Protein of unknown function; transcript detected in high-resolution tiling arrays; transcription induced by alpha pheromone in SpiderM medium; Spider and early-stage flow model biofilm induced (5, 6, 7, 8)	ORF, Uncharacterized	95.83	2.1	0.43	4.87	1.09341e-06	1.38999e-05
CR_00900W_A	orf19.3265	TRM1	Putative N2,N2-dimethylguanine tRNA methyltransferase; induced upon adherence to polystyrene (1)	ORF, Uncharacterized	92.61	2.09	0.41	5.05	4.34479e-07	5.97831e-06
C2_05180W_A	orf19.3548.1	WH11	White-phase yeast transcript; expression in opaques increases virulence/switching; mutant switches as WT; Hap43, hypoxia, ketoconazol induced; required for RPMI biofilm; Bcr1-induced in RPMI a/a biofilm; rat catheter, Spider biofilm induced (1, 4, 5, 6, 7, 8, 9, 10, 11, 12)	ORF, Verified	3392.14	2.06	0.14	14.55	5.45016e-48	2.97925e-45
C4_00140C_A	orf19.5639	HIS4	Multifunctional enzyme that catalyzes three steps of histidine biosynthesis, with phosphoribosyl-AMP cyclohydrolase, phosphoribosyl-ATP diphosphatase, and histidinol dehydrogenase activities; required for wild-type adhesion to human calls (1, 6, 7)	ORF, Verified	509.15	2.04	0.21	9.88	4.93278e-23	4.94347e-21
C1_08410C_A	orf19.386	SAM4	Putative S-adenosylmethionine-homocysteine methyltransferase; Hap43-repressed; alkaline induced; Spider biofilm repressed (1, 6, 7)	ORF, Uncharacterized	190.27	2.03	0.32	6.27	3.50737e-10	7.72521e-09
C6_02100W_A	orf19.3499		Secreted potein; Hap43-repressed; fluconazole-induced; regulated by Tsa1, Tsa1B under H2O2 stress conditions; induced by Mnl1p under weak acid stress; Spider biofilm induced (5, 6, 7, 8, 9)	ORF, Uncharacterized	271.5	2.02	0.25	8.1	5.37341e-16	2.58483e-14
C1_09680W_A	orf19.4831	MTS1	Sphingolipid C9-methyltransferase; catalyzes methylation of the 9th carbon in the long chain base component of glucosylceramides; glucosylceramide biosynthesis is important for virulence; Spider biofilm repressed (1, 6, 7)	ORF, Verified	415.31	2	0.22	8.97	2.93466e-19	2.00524e-17
C2_08370C_A	orf19.1435	TEF1	Translation elongation factor 1-alpha; at cell surface; binds human plasminogen; macrophage/pseudohyphal-induced; induced in RHE model of oral candidiasis, in clinical oral candidiasis isolates; possibly essential; Spider biofilm repressed (1, 2, 8, 9, 10, 11, 12, 13)	ORF, Verified	6213.83	2	0.14	13.93	3.89391e-44	1.46338e-41
CR_07080W_A	orf19.1815		Ortholog of S. cerevisae/S. pombe Tif6; constituent of 66S pre-ribosomal particles; Spider biofilm induced (5)	ORF, Uncharacterized	515.18	1.99	0.21	9.71	2.85401e-22	2.56137e-20
C6_00960W_A	orf19.97	CAN1	Basic amino acid permease; complements lysine transport mutation; 10 predicted transmembrane regions, 3 predicted N-glycosylation sites; phagocytosis by macrophages induces transcript; rat catheter, Spider and flow model biofilm induced (1, 7, 8, 9, 10, 11)	ORF, Verified	2056.39	1.99	0.13	15.65	3.24749e-55	2.78959e-52
C2_06470W_A	orf19.24	RTA2	Flippase involved in sphingolipid long chain base release; mediates calcineurin-dependent ER stress response and resistance to azoles; Plc1p, Ca2+, calcineurin-regulated; (6, 7, 8, 9, 10, 11)	ORF, Verified	1134.89	1.99	0.17	11.77	5.38662e-32	1.11689e-29
C1_07200W_A	orf19.4447	YMC1	Putative inner mitochondrial membrane transporter; flucytosine induced; Spider biofilm repressed (1, 6)	ORF, Uncharacterized	109.78	1.98	0.37	5.43	5.58037e-08	8.99749e-07
C7_01520W_A	orf19.6577	FLU1	Multidrug efflux pump of the plasma membrane; MDR family member of the MFS (major facilitator superfamily) of transporters; involved in histatin 5 efflux; fungal-specific (no human/murine homolog) (1, 7, 8)	ORF, Verified	95.31	1.98	0.39	5.08	3.70942e-07	5.16313e-06
CR_01620C_A	orf19.2551	MET6	Essential 5-methyltetrahydropteroyltriglutamate-homocysteine methyltransferase (cobalamin-independent methionine synthase); antigenic in murine/human systemic infection; heat shock, estrogen, GCN-induced; Spider biofilm repressed (2, 7, 8, 9, 10, 11, 12, 13, 14, 15, 16, 17, 18)	ORF, Verified	827.12	1.97	0.17	11.77	5.61087e-32	1.12263e-29
C1_11870W_A	orf19.5280	MUP1	Putative high affinity methionine permease; alkaline upregulated by Rim101; Spider biofilm induced (1, 6, 7)	ORF, Uncharacterized	356.52	1.96	0.22	9.02	1.83702e-19	1.33084e-17
C3_06590W_A	orf19.7448	LYS9	Saccharopine dehydrogenase; lysine biosynthesis; soluble protein in hyphae; amphotericin B repressed; Gcn4-regulated; colony morphology-related gene regulation by Ssn6; protein present in exponential and stationary growth phase yeast (1, 6, 7, 8, 9)	ORF, Uncharacterized	263.17	1.95	0.28	6.87	6.49614e-12	1.85125e-10
C4_02320C_A	orf19.2770.1	SOD1	Cytosolic copper- and zinc-containing superoxide dismutase; role in protection from oxidative stress; required for full virulence; alkaline induced by Rim101; induced by human blood; rat catheter, flow model and Spider biofilm repressed (3, 4, 5, 6, 7, 8, 9)	ORF, Verified	439.18	1.94	0.23	8.45	3.03867e-17	1.67628e-15
C4_01940W_A	orf19.4599	PHO89	Putative phosphate permease; transcript regulated upon white-opaque switch; alkaline induced by Rim101; possibly adherence-induced; F-12/CO2 model, rat catheter and Spider biofilm induced (1, 6, 7, 8, 9)	ORF, Uncharacterized	116.82	1.93	0.36	5.31	1.09391e-07	1.68659e-06
C6_02040W_A	orf19.3507	MCR1	NADH-cytochrome-b5 reductase; soluble in hyphae; alkaline downregulated; farnesol, ketoconazole or flucytosine induced; protein present in exponential and stationary growth phase yeast; YNB biofilm induced; rat catheter biofilm repressed (1, 6, 7, 8, 9, 10, 11)	ORF, Uncharacterized	294.95	1.91	0.25	7.64	2.1684e-14	9.05459e-13
C1_08210C_A	orf19.5100	MLT1	Vacuolar membrane transporter; MRP subfamily of ABC family; may transport organic anions conjugated to glutathione, glucuronate, or sulfate; needed for virulence in mouse peritonitis; Spider biofilm induced; flow model biofilm repressed (1, 10, 11, 12)	ORF, Verified	1928.17	1.88	0.13	14.13	2.59911e-45	1.20219e-42
C3_04140C_A	orf19.5858	EGD2	Nascent polypeptide associated complex protein alpha subunit; soluble protein in hyphae; macrophage/pseudohyphal-induced; protein level decrease in stationary phase cultures; GlcNAc-induced protein; Spider biofilm repressed (1, 6, 7, 8, 9, 10)	ORF, Verified	152.4	1.87	0.32	5.79	7.1627e-09	1.3293e-07
CR_01330W_A	orf19.3221	CPA2	Putative arginine-specific carbamoylphosphate synthetase; protein enriched in stationary phase yeast cultures; rat catheter biofilm induced; Spider biofilm induced (5, 6, 7)	ORF, Uncharacterized	537.75	1.86	0.23	8.24	1.75095e-16	8.99868e-15
CR_10320W_A	orf19.7608		Protein of unknown function; fluconazole-repressed; Spider biofilm induced (5, 6)	ORF, Uncharacterized	203.13	1.86	0.28	6.56	5.31463e-11	1.36568e-09
CR_03830C_A	orf19.4354	MCM2	Phosphorylated protein of unknown function; transcription is periodic with a peak at M/G1 phase of the cell cycle (6, 7)	ORF, Uncharacterized	220.09	1.86	0.26	7.04	1.87333e-12	5.74711e-11
C1_09520C_A	orf19.4816		Protein of unknown function; induced by nitric oxide (5)	ORF, Uncharacterized	399.04	1.85	0.21	8.98	2.64948e-19	1.83119e-17
C1_03790C_A	orf19.1030		Putative peptidyl-prolyl cis-trans isomerase (3)	ORF, Uncharacterized	944.81	1.83	0.16	11.81	3.58953e-32	8.30149e-30
C4_02720C_A	orf19.2726		Putative plasma membrane protein; Plc1-regulated; Spider biofilm induced (4, 5)	ORF, Uncharacterized	300.62	1.83	0.28	6.5	7.87237e-11	1.98061e-09
C4_05430C_A	orf19.1799	GAP5	General amino acid permease; fungal-specific (no human or murine homolog) (7)	ORF, Verified	152.19	1.82	0.35	5.14	2.74017e-07	3.9137e-06
C6_03540W_A	orf19.5720		Predicted membrane transporter, member of the monocarboxylate porter (MCP) family, major facilitator superfamily (MFS); ketoconazole or caspofungin repressed; Spider biofilm induced (5, 6, 7)	ORF, Verified	142.81	1.81	0.33	5.56	2.65158e-08	4.56848e-07
C4_04410C_A	orf19.3846	LYS4	Homoaconitase; regulated by Gcn4, Gcn2; induced in response to amino acid starvation (3-AT); induced by human whole blood or PMNs; Hap43-repressed; flow model and Spider biofilm repressed (1, 6, 7, 8, 9, 10)	ORF, Verified	158.62	1.8	0.3	5.93	3.00065e-09	5.82029e-08
C5_01100C_A	orf19.1960	CLN3	G1 cyclin; depletion abolishes budding and causes hyphal growth defects; farnesol regulated, functional in S. cerevisiae; other biofilm induced; Spider biofilm induced (6, 7, 8, 9, 10, 11, 12)	ORF, Verified	563.68	1.79	0.2	8.97	3.04521e-19	2.0574e-17
C5_04270C_A	orf19.3911	SAH1	S-adenosyl-L-homocysteine hydrolase; sulfur amino acid metabolism; antigenic in human; alkaline-, fluconazole-induced expression; Gcn4-regulated; amino acid starvation (3-AT) repressed; flow model biofilm induced; Spider biofilm repressed (1, 6, 7, 8, 9, 10)	ORF, Uncharacterized	828.12	1.78	0.18	9.81	1.05538e-22	9.76311e-21
C4_05320W_A	orf19.1789.1	LYS1	Saccharopine dehydrogenase (biosynthetic); enzyme of alpha-aminoadipate lysine biosynthesis pathway; functionally complements S. cerevisiae lys1 mutation; fungal-specific (no human or murine homolog) (1, 5, 6)	ORF, Verified	252.03	1.78	0.25	7.1	1.27819e-12	3.98226e-11
C2_07900W_A	orf19.2192	GDH2	Putative NAD-specific glutamate dehydrogenase; fungal-specific; transcript regulated by Nrg1, Mig1, Tup1, and Gcn4; stationary phase enriched protein; flow model biofilm induced; Spider biofilm induced (6, 7, 8, 9)	ORF, Uncharacterized	8401.87	1.78	0.11	15.51	2.94171e-54	2.21106e-51
CR_07710W_A	orf19.1986	ARO2	Putative chorismate synthase; fungal-specific (no human or murine homolog); protein level decreased in stationary phase yeast cultures; GlcNAc-induced protein (6, 7)	ORF, Uncharacterized	178.43	1.78	0.3	5.89	3.87353e-09	7.44138e-08
C5_02890W_A	orf19.4311	YNK1	Nucleoside diphosphate kinase (NDP kinase); homo-hexameric; soluble protein in hyphae; flucytosine induced; biofilm induced; macrophage-induced protein; stationary phase enriched protein; Spider biofilm repressed (1, 6, 7, 8, 9, 10, 11)	ORF, Verified	272.4	1.78	0.26	6.91	4.79346e-12	1.39242e-10
C4_06110C_A	orf19.4718	TRP5	Predicted tryptophan synthase; identified in detergent-resistant membrane fraction (possible lipid raft component); predicted N-terminal acetylation; Gcn4p-regulated; S. cerevisiae ortholog is Gcn4p regulated; upregulated in biofilm; (1, 6, 7)	ORF, Verified	479.3	1.77	0.2	8.81	1.29871e-18	8.05068e-17
C4_04080C_A	orf19.5302	PGA31	Cell wall protein; putative GPI anchor; expression regulated upon white-opaque switch; induced by Congo Red and cell wall regeneration; Bcr1-repressed in RPMI a/a biofilms (1, 6, 7, 8, 9, 10)	ORF, Verified	144.44	1.76	0.36	4.84	1.30503e-06	1.63142e-05
CR_06510W_A	orf19.715		Protein of unknown function; Hap43-induced; rat catheter and Spider biofilm induced (5, 6, 7)	ORF, Uncharacterized	272.13	1.76	0.29	6.15	7.79648e-10	1.63917e-08
CR_07050C_A	orf19.2360	URA2	Putative bifunctional carbamoylphosphate synthetase-aspartate transcarbamylase; flucytosine induced; macrophage/pseudohyphal-induced; 5'-UTR intron; flow model biofilm repressed (1, 6, 7, 8)	ORF, Uncharacterized	1431.07	1.76	0.14	12.82	1.33028e-37	3.80904e-35
C2_09060C_A	orf19.198	ASN1	Putative asparagine synthetase; soluble protein in hyphae; regulated by Rim101; decreased expression at pH 4 vs pH 8; protein detected during exponential and stationary phases of yeast-form growth (1, 6, 7)	ORF, Uncharacterized	946.46	1.73	0.18	9.49	2.36654e-21	2.00422e-19
CR_10470C_A	orf19.7624		Ortholog(s) have role in maturation of SSU-rRNA from tricistronic rRNA transcript (SSU-rRNA, 5.8S rRNA, LSU-rRNA) and nucleolus, small-subunit processome localization (5)	ORF, Uncharacterized	212.34	1.72	0.27	6.31	2.85371e-10	6.4509e-09
C7_00770W_A	orf19.7042		Protein of unknown function; induced by benomyl or in an azole-resistant strain overexpressing MDR1; induced by nitric oxide; Spider biofilm induced (6, 7, 8)	ORF, Uncharacterized	155.05	1.72	0.3	5.65	1.59278e-08	2.82518e-07
C3_04500C_A	orf19.5904	RPL19A	Ribosomal protein L19; repressed upon phagocytosis by murine macrophages; Hap43-induced gene; Spider biofilm repressed (3, 6, 7)	ORF, Verified	1794.94	1.72	0.13	13	1.25289e-38	3.96507e-36
C7_02100W_A	orf19.6507		Putative curved DNA-binding protein orthologous to S. pombe Cdb4; stationary phase enriched protein; rat catheter and Spider biofilm repressed (6, 7, 8)	ORF, Uncharacterized	240.49	1.71	0.26	6.52	6.82228e-11	1.7309e-09
C5_01110W_A	orf19.1959		Ortholog of S. cerevisiae : OTU2, C. dubliniensis CD36 : Cd36_51210, C. parapsilosis CDC317 : CPAR2_303850, Candida tenuis NRRL Y-1498 : CANTEDRAFT_114159 and Debaryomyces hansenii CBS767 : DEHA2E11990g (5)	ORF, Uncharacterized	130.98	1.7	0.35	4.86	1.14943e-06	1.45813e-05
C4_01190W_A	orf19.4670	CAS5	Transcription factor involved in regulation of cell wall homeostasis, adherence, stress response; mutants have reduced CFU in mice, hyphal defect in C. elegans infection; Spider biofilm induced (1, 6, 7, 8, 9, 10, 11, 12, 13)	ORF, Verified	432.95	1.7	0.2	8.37	5.83044e-17	3.13021e-15
C3_02110W_A	orf19.1635	RPL12	Ribosomal protein L12, 60S ribosomal subunit; downregulated by human whole blood or polymorphonuclear cells; genes encoding cytoplasmic ribosomal subunits are downregulated upon phagocytosis by macrophage; Tbf1p-activated; Hap43p-induced (3, 7, 8, 9)	ORF, Uncharacterized	662.9	1.69	0.17	9.85	7.18603e-23	6.96929e-21
C5_05320C_A	orf19.4026	HIS1	ATP phosphoribosyl transferase; enzyme of histidine biosynthesis; acid upregulated/alkaline repressed by Rim101; regulated by Gcn2, Gcn4; strain CA9 is a his1 mutant; flow model biofilm induced; Spider biofilm repressed (1, 6, 7, 8, 9)	ORF, Verified	175.48	1.69	0.3	5.69	1.24859e-08	2.25459e-07
C7_00990W_A	orf19.7015	RPP0	Putative ribosomal protein; antigenic in mouse; repressed upon phagocytosis by murine macrophage; induced by Tbf1; overlaps orf19.7014; Spider biofilm repressed (1, 8, 9, 10, 11, 12)	ORF, Uncharacterized	1005.94	1.67	0.15	11.01	3.3132e-28	5.2427e-26
CR_02430C_A	orf19.3722		Predicted protein of rapamycin resistance; Spider biofilm induced (5)	ORF, Uncharacterized	204.01	1.67	0.27	6.18	6.46396e-10	1.37829e-08
C2_03220C_A	orf19.909	STP4	C2H2 transcription factor; induced in core caspofungin response; colony morphology-related gene regulation by Ssn6; induced by 17-beta-estradiol, ethynyl estradiol; rat catheter and Spider biofilm induced (1, 6, 7, 8, 9, 10, 11)	ORF, Verified	653.99	1.63	0.17	9.4	5.63285e-21	4.63977e-19
C1_03190C_A	orf19.3010.1	ECM33	GPI-anchored cell wall protein; mutants show cell-wall defects and reduced adhesion, host cell damage, and endocytosis; mutant infection is immunoprotective in murine model; fluconazole-induced; caspofungin repressed (1, 5, 6, 7, 8, 9, 10, 11, 12)	ORF, Verified	1334.56	1.62	0.16	10.17	2.80079e-24	3.00735e-22
C4_02870C_A	orf19.2709	ZUO1	Ortholog of S. cerevisiae Zuo1; a cytosolic ribosome-associated chaperone; likely to be essential for growth, based on an insertional mutagenesis strategy; Spider biofilm repressed (1, 6)	ORF, Uncharacterized	396.54	1.62	0.21	7.63	2.2634e-14	9.38607e-13
CR_10170C_A	orf19.7593		Putative asparaginase; predicted role in asparagine catabolism; Spider biofilm induced (5)	ORF, Uncharacterized	345.84	1.61	0.23	7.03	2.10989e-12	6.41262e-11
C4_04480C_A	orf19.3838	EFB1	Translation elongation factor EF-1 beta; repressed by human whole blood or PMNs; macrophage/pseudohyphal-induced; antigenic in mouse; farnesol-downregulated; snoRNA snR18 is encoded within the EFB1 intron; Spider biofilm repressed (1, 5, 6, 7, 8, 9, 10)	ORF, Verified	870.98	1.6	0.18	9.02	1.86771e-19	1.33697e-17
C7_01790C_A	orf19.6541	RPL5	Ribosomal protein; repressed upon phagocytosis by murine macrophages; Hap43-induced; Spider biofilm repressed (1, 7, 8)	ORF, Uncharacterized	1028.48	1.6	0.15	10.81	3.13661e-27	4.38615e-25
C6_03230W_A	orf19.5610	ARG3	Putative ornithine carbamoyltransferase; Gcn4-regulated; Hap43-induced; repressed in alkalinizing medium; rat catheter and Spider biofilm induced (1, 6, 7, 8, 9, 10)	ORF, Uncharacterized	162.79	1.6	0.3	5.26	1.43728e-07	2.17144e-06
C6_02240C_A	orf19.3465	RPL10A	Predicted ribosomal protein; downregulated upon phagocytosis by murine macrophages; Hap43-induced; Spider biofilm repressed (4, 7, 8)	ORF, Uncharacterized	1109.11	1.59	0.17	9.43	4.25388e-21	3.55258e-19
C3_02310W_A	orf19.1614	MEP1	Ammonium permease; Mep1 more efficient permease than Mep2, Mep2 has additional regulatory role; 11 predicted transmembrane regions; low mRNA abundance; hyphal downregulated; flow model biofilm induced (1, 2, 7, 8)	ORF, Verified	319.58	1.59	0.27	5.97	2.42231e-09	4.74441e-08
C2_08640C_A	orf19.3612	PST2	Flavodoxin-like protein involved in oxidative stress protection and virulence; putative NADH:quinone oxidoreductase; similar to 1,4-benzoquinone reductase; induced by benomyl, oxidative stress via Cap1; fungal-specific (6, 7, 8, 9, 10, 11)	ORF, Verified	170.79	1.58	0.3	5.35	8.97255e-08	1.39772e-06
C3_04960W_A	orf19.5964.2	RPL35	Ribosomal protein; downregulation correlates with clinical development of fluconazole resistance; colony morphology-related gene regulation by Ssn6; Hap43-induced; Spider biofilm repressed (1, 4, 5, 6)	ORF, Uncharacterized	420.81	1.58	0.2	7.81	5.50303e-15	2.48795e-13
CR_03060W_A	orf19.2422	ARC1	Putative G4 nucleic acid binding protein; macrophage/pseudohyphal-repressed; protein enriched in stationary phase yeast-form cultures; Spider biofilm repressed (1, 6, 7)	ORF, Uncharacterized	230.21	1.58	0.26	6.01	1.82613e-09	3.63594e-08
C1_09290C_A	orf19.4788	ARG5,6	Arginine biosynthetic enzyme; processed in S. cerevisiae into 2 polypeptides with acetylglutamate kinase (Arg6) activity and acetylglutamate-phosphate reductase (Arg5) activity; Gcn4 regulated; alkaline repressed; Spider biofilm induced (1, 5, 6, 7)	ORF, Verified	668.97	1.57	0.17	9.09	1.03204e-19	7.95596e-18
C5_03070W_A	orf19.4336	RPS5	Ribosomal protein S5; macrophage/pseudohyphal-induced after 16 h; downregulated upon phagocytosis by murine macrophage; Hap43-induced; Spider biofilm repressed (1, 6, 7, 8)	ORF, Verified	876.31	1.55	0.16	9.87	5.50408e-23	5.42558e-21
C2_01610C_A	orf19.1470	RPS26A	Ribosomal protein; regulated by Nrg1, Tup1; repressed upon phagocytosis by murine macrophage; alternatively spliced intron in 5'-UTR; Spider biofilm repressed (1, 6, 7, 8, 9)	ORF, Alternatively spliced, Uncharacterized	722.4	1.55	0.17	9.29	1.55667e-20	1.2649e-18
C7_02500C_A	orf19.6459	DPP3	Protein similar to S. cerevisiae pyrophosphate phosphatase Dpp1; required for farnesol biosynthesis; repressed by 17-beta-estradiol, ethynyl estradiol; Spider biofilm induced (1, 7, 8, 9)	ORF, Verified	356.1	1.55	0.24	6.53	6.49536e-11	1.65494e-09
C5_01540W_A	orf19.4149.1		Protein component of the small (40S) ribosomal subunit; Spider biofilm repressed (2)	ORF, Uncharacterized	544.72	1.54	0.18	8.5	1.85623e-17	1.063e-15
C5_04590C_A	orf19.3942.1	RPL43A	Putative ribosomal protein, large subunit; repressed by human whole blood or PMNs; colony morphology-related gene regulation by Ssn6; Spider biofilm repressed (1, 4, 5)	ORF, Uncharacterized	498.58	1.54	0.22	6.9	5.29147e-12	1.51512e-10
C1_14060W_A	orf19.7214		Glucan 1,3-beta-glucosidase; regulated by Nrg1, Tup1 and possibly Tac1; induced by NO and during cell wall regeneration; stationary phase enriched; possibly essential (UAU1 method); F-12/CO2 early biofilm induced; flow biofilm repressed (5, 6, 7, 8, 9, 10, 11, 12)	ORF, Uncharacterized	2853.93	1.54	0.13	11.77	5.78772e-32	1.12263e-29
C7_04210C_A	orf19.7152		Protein similar to Aspergillus CYSK O-acetylserine sulfhydrylase, suggesting that C. albicans uses an O-acetyl-serine (OAS) pathway of sulfur assimilation; upregulated in biofilm; protein level decreases in stationary phase cultures (6, 7)	ORF, Uncharacterized	174.28	1.54	0.3	5.21	1.89534e-07	2.79331e-06
C5_04930C_A	orf19.3981	MAL31	Putative high-affinity maltose transporter; transcript is upregulated in clinical isolates from HIV+ patients with oral candidiasis; alkaline induced; Spider biofilm induced (1, 5, 6)	ORF, Uncharacterized	188.27	1.53	0.32	4.78	1.72425e-06	2.09452e-05
C3_06760W_A	orf19.6828		Ortholog(s) have role in rRNA processing and preribosome, large subunit precursor localization (5)	ORF, Uncharacterized	194.11	1.52	0.27	5.54	3.07871e-08	5.24427e-07
C3_02850C_A	orf19.276		Plasma membrane-associated protein; upregulated in an azole-resistant strain that overexpresses MDR1; Hap43-repressed; Spider biofilm induced (5, 6, 7, 8)	ORF, Verified	193.49	1.52	0.29	5.28	1.26957e-07	1.93754e-06
C7_00280W_A	orf19.7094	HGT12	Glucose, fructose, mannose transporter; major facilitator superfamily; role in macrophage-induced hyphal growth; detected at germ tube plasma membrane by mass spectrometry; Snf3p-induced; 12 probable transmembrane segments (1, 3, 5, 6, 10, 11)	ORF, Verified	955.74	1.51	0.15	9.77	1.45651e-22	1.32697e-20
C4_03470C_A	orf19.3374	ECE1	Candidalysin, cytolytic peptide toxin essential for mucosal infection; hypha-specific protein; regulated by Rfg1, Nrg1, Tup1, Cph1, Efg1, Hog1, farnesol, phagocytosis; fluconazole-induced; rat catheter and Spider biofilm induced (6, 7, 8, 9, 10, 11, 12, 13, 14, 15, 16, 17, 18, 19, 20)	ORF, Verified	324.34	1.51	0.3	5.05	4.44046e-07	6.09601e-06
C1_02590C_A	orf19.2947	SNZ1	Stationary phase protein; vitamin B synthesis; induced byyeast-hypha switch, 3-AT or in azole-resistant strain overexpressing MDR1; soluble in hyphae; regulated by Gcn4, macrophage; Spider biofilm induced; rat catheter biofilm repressed (1, 7, 8, 9, 10, 11, 12, 13, 14)	ORF, Verified	441.49	1.51	0.21	7.09	1.31363e-12	4.07159e-11
C4_07180W_A	orf19.3087	UBI3	Fusion of ubiquitin with the S34 protein of the small ribosomal subunit; mRNA decreases upon heat shock, appears to be degraded; functional homolog of S. cerevisiae RPS31; Hap43-induced; Spider biofilm repressed (1, 6, 7)	ORF, Verified	1204.96	1.51	0.14	10.51	8.10348e-26	1.05927e-23
C1_03090W_A	orf19.3002	RPS1	Putative ribosomal protein 10 of the 40S subunit; elicits host antibody response during infection; transcript induced during active growth; Spider biofilm repressed (7, 8, 9)	ORF, Verified	1349.87	1.51	0.15	10.19	2.11699e-24	2.35731e-22
C1_06450C_A	orf19.6265.1	RPS14B	Putative ribosomal protein; repressed upon phagocytosis by murine macrophage; transcript positively regulated by Tbf1; Spider biofilm repressed (1, 2, 5)	ORF, Alternatively spliced, Verified	456.04	1.5	0.2	7.59	3.08598e-14	1.22888e-12
C1_01480C_A	orf19.3334	RPS21	Protein component of the small (40S) subunit; repressed upon phagocytosis by murine macrophage; positively regulated by Tbf1; Spider biofilm repressed (1, 6, 7)	ORF, Uncharacterized	1260.72	1.5	0.15	10.33	5.40817e-25	6.50386e-23

## Sheet: Down in ILS1biofilm
Feature	ORF	Name	Description	Feature type	baseMean	log2FoldChange	lfcSE	stat	pvalue	padj
CR_07820W_A	orf19.3711		Protein with monooxygenase domains; flow model biofilm induced (5)	ORF, Uncharacterized	4271.79	-4.49	0.43	-10.37	3.49052e-25	4.28337e-23
C2_03710W_A	orf19.849	MNN41	Ortholog(s) have enzyme activator activity and role in protein N-linked glycosylation, protein O-linked glycosylation (5)	ORF, Verified	32.27	-4.31	0.85	-5.04	4.54207e-07	6.22129e-06
C2_05060C_A	orf19.3537		Putative sulfiredoxin; regulated by Tsa1, Tsa1B in minimal media at 37 degrees C; flow model biofilm induced; Spider biofilm induced (5, 6, 7)	ORF, Uncharacterized	29.24	-4.16	0.88	-4.75	2.05783e-06	2.47475e-05
C3_05620W_A	orf19.6997	ATO5	Putative fungal-specific transmembrane protein (1)	ORF, Verified	245.25	-4.08	0.38	-10.86	1.84008e-27	2.69864e-25
CR_07940W_A	orf19.604		Ortholog(s) have cytosol localization (5)	ORF, Uncharacterized	168.67	-3.44	0.35	-9.83	8.36278e-23	7.85709e-21
C2_04940C_A	orf19.3526	ITR1	MFS inositol transporter; uptake of exogenous inositol; 12 transmembrane motifs; expressed in rich medium; fluconazole, caspofungin repressed; possibly essential (UAU1 method); flow model, rat catheter and Spider biofilm induced (1, 2, 3, 8, 9, 10, 11, 12)	ORF, Verified	287.2	-3.36	0.29	-11.79	4.61149e-32	9.90317e-30
C1_11320C_A	orf19.670.2		Protein of unknown function; hypoxia, Hap43-repressed; ketoconazole induced; induced in oralpharyngeal candidasis; 16h flow model biofilm repressed, late-stage flow model biofilm induced; rat catheter and Spider biofilm induced (2, 3, 4, 5, 6, 7)	ORF, Uncharacterized	566.91	-3.34	0.2	-16.57	1.22086e-61	1.2235e-58
C6_03670C_A	orf19.5735.3		Protein of unknown function; Spider biofilm induced (2)	ORF, Dubious	40.5	-3.33	0.65	-5.09	3.5812e-07	5.00785e-06
C1_09250W_A	orf19.4784	CRP1	Copper transporter; CPx P1-type ATPase; mediates Cu resistance; similar to Menkes and Wilson disease proteins; copper-induced; Tbf1-activated; suppresses Cu sensitivity of S. cerevisiae cup1 mutant; flow model biofilm induced (1, 2, 6, 7)	ORF, Verified	1797.58	-3.27	0.44	-7.37	1.72354e-13	6.16884e-12
CR_03190C_A	SNRNAU1	SNRNAU1	Highly conserved U1 small nuclear RNA involved in splicing; ortholog of S. cerevisiae SNR19 (1)	snRNA, Uncharacterized	128.67	-3.11	0.38	-8.17	3.07612e-16	1.56752e-14
C6_04490W_A	orf19.2133	LIP4	Secreted lipase, member of a differentially expressed lipase gene family with possible roles in nutrition and/or in creating an acidic microenvironment; expressed more strongly during mucosal infections than during systemic infections (1, 6)	ORF, Verified	64	-3.09	0.54	-5.75	9.16938e-09	1.67585e-07
C2_07430C_A	orf19.1888		Putative nicotinamide riboside hydrolase; cleaves N-glycosidic bonds in nucleosides; pyrimidine salvage and nicotinamide riboside salvage pathways; Spider biofilm induced (5)	ORF, Uncharacterized	392.38	-3.02	0.23	-13.07	5.20885e-39	1.8424e-36
C6_04520W_A	orf19.2138	ILS1	Putative isoleucyl-tRNA synthetase, the target of drugs including the cyclic beta-amino acid icofungipen/PLD-118/BAY-10-8888 and mupirocin; protein present in exponential and stationary growth phase yeast cultures (6, 7, 8, 9)	ORF, Uncharacterized	336.88	-2.97	0.29	-10.1	5.78618e-24	5.99867e-22
C1_00290W_A	orf19.6078	POL93	Predicted ORF in retrotransposon Tca8 with similarity to the Pol region of retrotransposons encoding reverse transcriptase, protease and integrase; downregulated in response to ciclopirox olamine; F-12/CO2 early biofilm induced (1, 6)	ORF, Uncharacterized, transposable element gene	575.22	-2.9	0.2	-14.53	7.86798e-48	3.94251e-45
C4_02230C_A	orf19.4567		Catechol 1,2-dioxygenase (1,2-CTD), involved in degradation of aromatic compounds; Spider biofilm induced (5, 6)	ORF, Verified	656.31	-2.71	0.18	-14.78	2.03143e-49	1.35722e-46
C5_01360W_A	orf19.1932	CFL4	C-terminus similar to ferric reductases; induced in low iron; Sfu1-repressed; ciclopirox olamine induced; colony morphology-related gene regulation by Ssn6; Hap43-repressed; Sef1-regulated (1, 2, 3, 8, 9, 10)	ORF, Uncharacterized	100.83	-2.69	0.43	-6.33	2.39764e-10	5.545e-09
C6_03370W_A	orf19.5626		Protein of unknown function; Plc1-regulated; induced by Mnl1 under weak acid stress; flow model biofilm induced (5, 6, 7)	ORF, Uncharacterized	212.66	-2.64	0.32	-8.33	8.24822e-17	4.35057e-15
C3_01360C_A	orf19.1715	IRO1	Protein with a role in iron utilization, pathogenesis; both IRO1 and adjacent URA3 are mutated in strain CAI4; suppresses S. cerevisiae aft1 mutant low-iron growth defect; hyphal-induced; reports differ about iron regulation (1, 6, 7, 8)	ORF, Verified	240.88	-2.63	0.29	-9.14	5.96982e-20	4.66189e-18
CR_06540W_A	orf19.712	KIP1	Non-essential kinesin from the bipolar (Kinesis-5) family; involved in formation of the mitotic spindle (1)	ORF, Verified	112.67	-2.63	0.38	-6.97	3.22166e-12	9.49601e-11
C3_00650W_A	orf19.5392	NGT1	N-acetylglucosamine (GlcNAc)-specific transporter; role in GlcNAc (but not serum) induced hyphal growth; localizes to plasma membrane; induced by GlcNAc, macrophage engulfment; 12 transmembrane, major facilitator superfamily (1)	ORF, Verified	513.88	-2.57	0.27	-9.58	9.52573e-22	8.30119e-20
CR_03250C_A	orf19.2398		Protein of unknown function; Hap43-repressed; transcript increased in azole-resistant strain overexpressing CDR1 and CDR2; possibly regulated by Tac1; induced by Mnl1 in weak acid stress; flow model biofilm induced; Spider biofilm induced (5, 6, 7, 8, 9, 10)	ORF, Uncharacterized	184.97	-2.55	0.32	-8.04	9.31421e-16	4.44495e-14
C4_05780C_A	orf19.1264	CFL2	Oxidoreductase; iron utilization; Sfu1/Sef1/Hap43/Nrg1/Tup1/Rim101 regulated; alkaline/low iron/fluphenazine/ciclopirox olamine, flucytosine, fluconazole, Spider/flow model/rat catheter biofilm induced; caspofungin/amphotericin B repressed (1, 2, 7, 8, 9, 10, 11, 12, 13, 14, 15, 16)	ORF, Uncharacterized	527.77	-2.52	0.22	-11.25	2.25497e-29	3.87403e-27
C3_05170W_A	orf19.5992	WOR2	Zn(II)2Cys6 transcription factor; regulator of white-opaque switching; required for maintenance of opaque state; Hap43-induced (1, 6)	ORF, Verified	290.02	-2.46	0.27	-8.94	3.77991e-19	2.49765e-17
C4_02520C_A	orf19.2749		BTB/POZ domain protein; induced by Mnl1 under weak acid stress; flow model biofilm induced; Spider biofilm induced (5, 6, 7)	ORF, Uncharacterized	179.66	-2.43	0.33	-7.31	2.77041e-13	9.57384e-12
CR_04960C_A	orf19.633	CRG1	Methyltransferase involved in sphingolipid homeostasis, methylates a drug cantharidin; decreased expression in hyphae compared to yeast; expression regulated during planktonic growth; flow model biofilm induced; Hap43-repressed gene (1, 5, 6, 7, 8)	ORF, Verified	65.12	-2.42	0.49	-4.91	9.09522e-07	1.1812e-05
C5_02680W_A	orf19.4286		Protein of unknown function; flow model biofilm induced; Spider biofilm induced (5, 6)	ORF, Uncharacterized	69.99	-2.42	0.48	-5	5.72486e-07	7.71829e-06
C6_02780C_A	orf19.5551	MIF2	Centromere-associated protein; similar to CENP-C proteins; Cse4p and Mif2p colocalize at C. albicans centromeres (1)	ORF, Verified	127.08	-2.36	0.36	-6.6	4.15906e-11	1.08261e-09
C2_00330C_A	orf19.2099	HIR1	Component of the HIR complex, a nucleosome assembly factor involved in chromatin formation; involved in regulation of white-opaque switching frequency (1)	ORF, Verified	468.96	-2.35	0.21	-11.42	3.29715e-30	5.8311e-28
C3_04840C_A	orf19.5952		Protein of unknown function; induced by nitric oxide independent of Yhb1; Sef1, Sfu1, and Hap43-induced; rat catheter and Spider biofilm induced (5, 6, 7, 8, 9)	ORF, Uncharacterized	155.26	-2.28	0.32	-7.09	1.34687e-12	4.15319e-11
C2_01020W_A	orf19.2020	HGT6	Putative high-affinity MFS glucose transporter; 20 family members; induced in core stress response; fluconazole, oralpharyngeal candidasis induced; flow model biofilm induced; Spider biofilm induced (1, 2, 7, 8, 9, 10)	ORF, Verified	2017.14	-2.26	0.18	-12.9	4.7254e-38	1.42069e-35
CR_08420W_A	orf19.6408		Putative DnaJ-like heat shock/chaperone; Hap43-repressed; Spider and F-12/CO2 biofilm induced (5, 6, 7)	ORF, Uncharacterized	146.18	-2.26	0.41	-5.55	2.80495e-08	4.8189e-07
CR_03890W_A	orf19.467	WOR3	Transcription factor; modulator of white-opaque switch; induced in opaque cells; promoter bound by Wor1; overexpression at 25 degr shifts cells to opaque state; deletion stabilizes opaque cells at higher temperatures; Spider biofilm induced (1, 6, 7)	ORF, Verified	191.3	-2.22	0.37	-5.96	2.51027e-09	4.90073e-08
C1_07360W_A	orf19.4435		Ortholog(s) have structural constituent of cytoskeleton activity, role in microtubule nucleation and spindle pole body localization (5)	ORF, Uncharacterized	187.01	-2.21	0.31	-7.22	5.08125e-13	1.65154e-11
C1_03750W_A	orf19.1034		Protein with a predicted cytochrome b5-like Heme/Steroid binding domain; Hap43, caspofungin repressed; flow model biofilm induced (5, 6, 7)	ORF, Uncharacterized	84.67	-2.21	0.42	-5.3	1.13868e-07	1.75112e-06
C1_05540C_A	orf19.411		Protein similar to GTPase regulators; induced in low iron; transcript activated by Mnl1 under weak acid stress; Hap43-, Sfu1- and Sef1-regulated; flow model biofilm induced, Spider biofilm induced (4, 5, 6, 7, 8, 9, 10)	ORF, Uncharacterized	1243.07	-2.19	0.2	-11.02	2.95423e-28	4.80102e-26
C2_05200C_A	orf19.3550	SGO1	Component of the spindle checkpoint; cell-cycle regulated periodic mRNA expression (1)	ORF, Uncharacterized	86.61	-2.18	0.41	-5.27	1.33709e-07	2.02517e-06
C5_03060C_A	orf19.4335	TNA1	Putative nicotinic acid transporter; detected at germ tube plasma membrane by mass spectrometry; transcript induced upon phagocytosis by macrophage; rat catheter biofilm induced (1, 6, 7)	ORF, Verified	312.55	-2.1	0.23	-8.93	4.12932e-19	2.69887e-17
C3_07730W_A	orf19.6713	WOR4	Predicted C2H2 zinc finger protein, involved in transcriptional regulation of white-opaque phenotypic switching; activator of the opaque cell type (1)	ORF, Verified	192.29	-2.09	0.33	-6.33	2.45786e-10	5.61944e-09
CR_06950C_A	orf19.2369.1	ATX1	Putative cytosolic copper metallochaperone; flucytosine induced; Ssr1-repressed; rat catheter biofilm induced (1, 4, 5)	ORF, Uncharacterized	100.23	-2.02	0.4	-5.06	4.16623e-07	5.77225e-06
C2_06740W_A	orf19.3148		Protein of unknown function; possibly an essential gene, disruptants not obtained by UAU1 method (5)	ORF, Uncharacterized	92.25	-2	0.42	-4.82	1.46785e-06	1.80494e-05
C5_01280C_A	orf19.1941	NUF2	Kinetochore component; amount of Nuf2p and Mtw1p protein detected at each centromere is consistent with a single kinetochore microtubule attachment site (1)	ORF, Verified	91.57	-1.97	0.41	-4.84	1.2979e-06	1.62589e-05
C1_14130W_A	orf19.7219	FTR1	High-affinity iron permease; required for mouse virulence, low-iron growth; iron, amphotericin B, caspofungin, ciclopirox, Hog1p, Sef1p, Sfu1p, and Hap43p regulated; complements S. cerevisiae ftr1 iron transport; Hap43p-repressed (1, 5, 6, 7, 8, 9, 10, 11, 12, 13)	ORF, Verified	994.38	-1.95	0.19	-10.17	2.72729e-24	2.98167e-22
CR_05540C_A	orf19.5848		RING-type zinc finger protein; upregulated during oral infection; mutants have reduced ability to damage oral epithelial cells; Spider and flow model biofilm induced (5, 6, 7)	ORF, Uncharacterized	340.09	-1.94	0.22	-8.74	2.27534e-18	1.38198e-16
CR_03260W_A	orf19.2397.3		Putative aminotransferase; Hap43-repressed; homozygous Tn insertion decreases colony wrinkling in filament-inducing conditions, does not block true hypha formation in liquid media; rat catheter and Spider biofilm induced (3, 4, 5, 6)	ORF, Verified	310.43	-1.92	0.26	-7.4	1.38307e-13	5.04025e-12
C2_07240C_A	orf19.2281		Ortholog(s) have mitochondrion localization (5)	ORF, Uncharacterized	320.37	-1.89	0.29	-6.44	1.18273e-10	2.87926e-09
C2_10290W_A	orf19.1750	SLR1	Protein similar to mammalian SR-like RNA splicing factor; involved in filamentous growth and virulence; gene has intron; Spider biofilm repressed (1, 6, 7)	ORF, Verified	712.62	-1.87	0.18	-10.6	2.83438e-26	3.78736e-24
C6_00480C_A	orf19.4211	FET31	Putative multicopper oxidase; ketoconazole/caspofungin/amphotericin B repressed; Sef1/Sfu1/Hap43 regulated; reports differ if functional homolog of ScFet3; rat catheter and Spider biofilm induced (7, 8, 9, 10, 11, 12)	ORF, Verified	1292.17	-1.84	0.16	-11.8	3.7804e-32	8.41909e-30
C2_00720C_A	orf19.2054	FGR15	Putative transcription factor with zinc finger DNA-binding motif; lacks an ortholog in S. cerevisiae; transposon mutation affects filamentous growth; caspofungin induced; mutation causes marginal increase in caspofungin sensitivity (1, 2, 7, 8)	ORF, Verified	99.55	-1.82	0.38	-4.82	1.4053e-06	1.7387e-05
C5_05390C_A	orf19.4035	PGA4	GPI-anchored cell surface protein; beta-1,3-glucanosyltransferase with similarity to the A. fumigatus GEL family; transcript induced in RHE model of oral candidiasis; fluconazol-induced (6, 7, 8, 9, 10, 11, 12)	ORF, Verified	1223.65	-1.79	0.16	-11.16	6.36355e-29	1.06289e-26
C1_09320C_A	orf19.4792		Protein with a regulator of G-protein signaling domain; Plc1-regulated; Spider biofilm induced; rat catheter biofilm repressed (5, 6, 7)	ORF, Uncharacterized	363.53	-1.78	0.24	-7.46	8.60766e-14	3.19493e-12
C2_08700C_A	orf19.3606		Ortholog of S. cereviae Sna4 vacuolar outer membrane protein that plays a role in sensitivity to NA+; induced by Mnl1 under weak acid stress (4)	ORF, Uncharacterized	219.56	-1.77	0.26	-6.68	2.36371e-11	6.31689e-10
C4_07080C_A	orf19.3100		Protein with t-SNARE domains and a microtubule associated domain; Hap43-induced gene; repressed by alpha pheromone in SpiderM medium (5, 6)	ORF, Uncharacterized	128.91	-1.75	0.33	-5.24	1.59389e-07	2.36061e-06
C7_02200W_A	orf19.6494		Putative RNA binding protein; induced during infection of murine kidney, compared to growth in vitro; has murine homolog (1)	ORF, Uncharacterized	268.52	-1.75	0.24	-7.23	4.98003e-13	1.62744e-11
C5_01400W_A	orf19.1926	SEF2	Zn(II)2Cys6 transcription factor, required for normal resistance to copper; repressed by Sfu1 in high-iron conditions; regulated by Sef1, Sfu1, and Hap43; rat catheter and Spider biofilm induced (1, 6, 7, 8, 9, 10)	ORF, Verified	235.65	-1.74	0.26	-6.69	2.19175e-11	5.89288e-10
C1_08610C_A	orf19.409		Ortholog of S. cerevisiae Aim38/Rcf2, cytochrome c oxidase subunit; plasma membrane localized; Hap43-repressed; induced in oralpharyngeal candidasis; flow model biofilm induced; Spider biofilm repressed (1, 6, 7, 8, 9, 10)	ORF, Verified	1413.92	-1.74	0.14	-12.24	1.99942e-34	5.00939e-32
CR_09520C_A	orf19.6610		Ortholog(s) have microtubule plus end polymerase, microtubule plus-end binding, structural constituent of cytoskeleton activity (5)	ORF, Uncharacterized	143.65	-1.74	0.32	-5.41	6.17939e-08	9.93493e-07
CR_05920C_A	orf19.6621	MHP1	Protein similar to S. cerevisiae Mhp1p, which is involved in microtubule stabilization; transposon mutation affects filamentous growth; possibly transcriptionally regulated upon hyphal formation; possibly an essential gene (by UAU1 method) (1, 6, 7)	ORF, Verified	748.93	-1.73	0.19	-9.03	1.74291e-19	1.27806e-17
CR_00310C_A	orf19.7502		Protein of unknown function; Hap43-induced gene; upregulated in a cyr1 null mutant; Spider biofilm induced (5, 6, 7)	ORF, Uncharacterized	503.47	-1.73	0.2	-8.51	1.69537e-17	9.80216e-16
C1_02730W_A	orf19.2962		Protein of unknown function; Spider biofilm induced (5)	ORF, Uncharacterized	210.39	-1.72	0.31	-5.46	4.63755e-08	7.61901e-07
C3_06470W_A	orf19.7436	AAF1	Possible regulatory protein; possible adhesin-like; Glu-rich domain; production in S. cerevisiae increases endothelial cell adherence and flocculence; flow model biofilm, alkaline or caspofungin induced (1, 6, 7, 8, 9)	ORF, Verified	346.69	-1.71	0.24	-7.25	4.11557e-13	1.35972e-11
C3_02300W_A	orf19.1616	FRG23	Protein of unknown function; repressed by a1/alpha2 in white-phase cells, a-specific, alpha factor-induced; Hap43-repressed; flow model biofilm induced; Tn mutation affects filamentous growth; (1, 7, 8, 9, 10)	ORF, Verified	123.02	-1.71	0.34	-5	5.60081e-07	7.58507e-06
C3_07110W_A	orf19.6789		S. cerevisiae ortholog Nud1 is a spindle pole body outer plaque component; it acts through the mitotic exit network to specify asymmetric spindle pole body inheritance; Hap43-induced gene (5)	ORF, Uncharacterized	152.88	-1.7	0.34	-5	5.66745e-07	7.65806e-06
C1_11210C_A	orf19.681	HAP43	CCAAT-binding factor-dependent transcription factor; repressor; also called CAP2; required for low iron response; similar to bZIP transcription factor AP-1; repressed by Sfu1; ciclopirox olamine induced; rat catheter, Spider biofilm induced (2, 7, 8, 9, 10, 11, 12)	ORF, Verified	751.92	-1.69	0.17	-10.05	8.9708e-24	9.14262e-22
C2_06670C_A	orf19.1223	DBF2	Essential serine/threonine protein kinase involved in mitotic spindle formation and cytokinesis; required for septum formation, exit from mitosis, and normal hyphal morphogenesis; virulence-group-correlated expression (2, 6)	ORF, Verified	187.98	-1.68	0.3	-5.52	3.36437e-08	5.68258e-07
C3_03690W_A	orf19.6950		Putative vacuolar membrane transporter for cationic amino acids; Spider biofilm induced (5)	ORF, Uncharacterized	123.98	-1.67	0.34	-4.9	9.64896e-07	1.24772e-05
C2_02860W_A	orf19.5818	SUR2	Putative ceramide hydroxylase; predicted enzyme of sphingolipid biosynthesis; regulated by Tsa1, Tsa1B under H2O2 stress conditions; Spider and flow model biofilm induced (1, 6, 7, 8)	ORF, Uncharacterized	903.76	-1.66	0.16	-10.23	1.46149e-24	1.6581e-22
C1_01920W_A	orf19.4531	ROA1	Putative PDR-subfamily ABC transporter involved in sensitivity to azoles; Spider biofilm induced (1, 7, 8, 9)	ORF, Verified	569.46	-1.65	0.22	-7.5	6.55593e-14	2.4638e-12
C1_04500W_A	orf19.6844	ICL1	Isocitrate lyase; glyoxylate cycle enzyme; required for virulence in mice; induced upon phagocytosis by macrophage; farnesol regulated; Pex5-dependent peroxisomal localization; stationary phase enriched; rat catheter, Spider biofilm induced (6, 7, 8, 9, 10, 11)	ORF, Verified	2494.02	-1.63	0.15	-10.91	9.90614e-28	1.48914e-25
C2_03770C_A	orf19.844	STE11	Protein similar to S. cerevisiae Ste11p; mutants are sensitive to growth on H2O2 medium (6, 7)	ORF, Uncharacterized	340.7	-1.63	0.23	-7.03	2.11159e-12	6.41262e-11
C3_07560W_A	orf19.6734	TCC1	Putative transcription factor/corepressor; regulation of filamentation and virulence; interacts with Tup1; regulates hypha-specific gene expression; contains 4 tetratricopeptide repeat (TPR) motifs; flucytosine repressed; Tbp1-induced (1, 6, 7)	ORF, Verified	1292.37	-1.62	0.16	-10.31	6.25073e-25	7.36973e-23
CR_00200W_A	orf19.7514	PCK1	Phosphoenolpyruvate carboxykinase; glucose, C-source, yeast-hypha, Hap43 regulated; fluconazole, phagocytosis, H2O2, oral candidasis, Spider/rat catheter/flow model biofilm induced; repressed in biofilm by Bcr1, Tec1, Ndt80, Rob1, Brg1 (1, 6, 7, 8, 9, 10, 11, 12, 13, 14)	ORF, Uncharacterized	1389.83	-1.6	0.14	-11.44	2.7869e-30	5.07807e-28
C2_03690C_A	orf19.851	MNN42	Protein of unknown function; repressed by Rim101; negatively modulates intracellular ATP levels during the development of azole resistance; induced by Ca(2+) in a calcineurin-dependent manner; Spider biofilm induced (5, 6, 7)	ORF, Verified	146.26	-1.6	0.32	-5.06	4.12964e-07	5.73477e-06
CR_09460C_A	orf19.7341.1		Protein of unknown function; Spider biofilm induced (1)	ORF, Uncharacterized	388.93	-1.6	0.21	-7.51	5.88599e-14	2.24003e-12
CR_09960C_A	orf19.7570	UGA3	Zn(II)2Cys6 transcription factor; required for utilization of gamma-aminobutyrate (GABA) as a nitrogen source; mutants display decreased CFU in mouse kidneys; Spider biofilm induced (1, 2, 7, 8, 9, 10)	ORF, Verified	852	-1.59	0.18	-8.89	6.25937e-19	4.04706e-17
C4_03890W_A	orf19.5045	PTP2	Predicted protein tyrosine phosphatase; involved in regulation of MAP kinase Hog1 activity; induced by Mnl1 under weak acid stress; rat catheter and Spider biofilm induced (1, 5, 6, 7)	ORF, Verified	140.69	-1.57	0.32	-4.85	1.26402e-06	1.59007e-05
C5_04440C_A	orf19.3931	SCF1	Putative succinate-fumarate transporter; involved in repression of growth on sorbose; alkaline induced; rat catheter biofilm induced; Spider biofilm induced (1, 3, 7, 8, 9)	ORF, Verified	528.06	-1.56	0.25	-6.32	2.65509e-10	6.02454e-09
C3_01320C_A	orf19.1719	SGA1	Putative glucoamylase; induced in oralpharyngeal candidasis; rat catheter and Spider biofilm induced (6, 7, 8)	ORF, Uncharacterized	186.72	-1.56	0.3	-5.26	1.46977e-07	2.20944e-06
C6_01290C_A	orf19.136	QDR3	Predicted membrane transporter, member of the drug:proton antiporter (12 spanner) (DHA1) family, major facilitator superfamily (MFS); Hap43p-repressed gene (6, 7)	ORF, Verified	232.38	-1.55	0.26	-5.91	3.44532e-09	6.66132e-08
C1_08900W_A	orf19.4749		Protein of unknown function; hyphal-induced expression, regulated by Cyr1, Ras1, Efg1; Hap43-induced gene; Spider biofilm induced (5, 6, 7)	ORF, Uncharacterized	135.06	-1.55	0.32	-4.78	1.70988e-06	2.08128e-05
C2_00740C_A	orf19.2050		Ortholog(s) have sterol esterase activity, role in cellular lipid metabolic process, sterol metabolic process and integral component of membrane, lipid droplet localization (5)	ORF, Uncharacterized	199.18	-1.55	0.27	-5.67	1.3984e-08	2.50255e-07
C2_06880C_A	orf19.2242	PRB1	Endoprotease B; regulated by heat, carbon source (GlcNAc-induced), nitrogen, macrophage response, human neutrophils; similar to (does not replace) S. cerevisiae vacuolar B protease Prb1p; flow model biofilm induced; Spider biofilm induced (1, 2, 7, 8, 9, 10)	ORF, Uncharacterized	1138.45	-1.54	0.15	-10.15	3.32729e-24	3.51e-22
C2_06860W_A	orf19.2238	LTE1	Protein similar to GDP/GTP exchange factors; repressed by alpha pheromone in SpiderM medium; flow model biofilm repressed (1, 6)	ORF, Uncharacterized	153.02	-1.54	0.32	-4.78	1.7668e-06	2.14189e-05
CR_02640W_A	orf19.2823	RFG1	HMG domain transcriptional repressor of filamentous growth and hyphal genes; in Tup1-dependent and -independent pathways; binds DNA; transcript not regulated by oxygen or serum; not responsible for hypoxic repression; Spider biofilm induced (1, 2, 6, 7)	ORF, Verified	219.35	-1.53	0.3	-5.18	2.16213e-07	3.14791e-06
C1_05340C_A	orf19.431	ZCF2	Zn(II)2Cys6 transcription factor, required for adaptation to reactive sulfur species; regulates sulfite tolerance through expression of SSU1 and CDG1; Hap43-repressed; Spider biofilm induced (1, 2, 7, 8, 9, 10)	ORF, Verified	432.86	-1.51	0.2	-7.43	1.11869e-13	4.10165e-12
C1_07980C_A	orf19.5069		Ortholog of S. cerevisiae Sae3; meiosis specific protein involved in DMC1-dependent meiotic recombination in S. cerevisiae; Spider biofilm induced (5)	ORF, Uncharacterized	171.51	-1.51	0.29	-5.16	2.48381e-07	3.56448e-06
C1_12790C_A	orf19.6343	FEN1	Putative fatty acid elongase; predicted role in sphingolipid biosynthesis; possibly an essential gene, disruptants not obtained by UAU1 method; Spider and flow model biofilm induced (5, 6, 7)	ORF, Verified	382.67	-1.5	0.24	-6.28	3.42041e-10	7.56137e-09

## Sheet: WTbiofilm
Genes up-regulated in the WT biofilm	log2FoldChange		Genes down-regulated in the WT biofilm	log2FoldChange
C3_00920W_A	15.7965		CR_06810W_A	-13.1773
CR_07820W_A	15.2697		CR_04210C_A	-11.8493
C4_05130C_A	15.1675		C3_07920W_A	-10.7689
C1_01740W_A	14.0376		CR_01440C_A	-10.2706
C7_03560W_A	13.5109		C1_09080C_A	-10.0705
CR_02490W_A	13.2124		C1_00470C_A	-9.87561
C1_13080W_A	13.2088		C3_01540W_A	-9.84849
C2_02230C_A	12.9767		C1_04260W_A	-9.44691
C2_02570W_A	12.573		CR_01860W_A	-9.41601
C3_01130C_A	12.4944		C4_00440C_A	-9.29428
C4_02230C_A	12.4241		C2_01950C_A	-9.27931
C5_04380C_A	11.8003		C1_04450C_A	-8.99253
C3_07070C_A	11.7876		C5_04130C_A	-8.93332
C4_02930W_A	11.7845		CR_05210W_A	-8.92716
C3_05050W_A	11.7548		C4_02440C_A	-8.68061
C1_10060C_A	11.6295		CR_10110W_A	-8.22831
C1_02520W_A	11.5894		C2_09530W_A	-8.19065
C4_05580C_A	11.4695		C2_01000W_A	-8.02759
C3_03580C_A	11.4243		C4_04050C_A	-7.9516
C5_00540C_A	11.3563		C2_05960C_A	-7.83728
C3_05580C_A	11.2999		C6_01510W_A	-7.82215
C1_13430C_A	11.2982		C5_01550C_A	-7.79134
C2_07240C_A	11.2515		CR_10100C_A	-7.73267
C7_02010C_A	11.2404		C1_00840C_A	-7.61095
C7_00280W_A	11.2249		C2_01910W_A	-7.37325
C2_08260W_A	11.2026		C4_03520C_A	-7.21483
C2_03350W_A	11.1893		C6_03480W_A	-7.13586
C6_02890C_A	11.1586		C5_03810C_A	-7.09604
C7_00870W_A	11.1331		C5_03530C_A	-7.08782
C3_05620W_A	11.1231		C1_13870W_A	-7.03403
C6_03240W_A	10.9339		C6_01990W_A	-6.98331
CR_07940W_A	10.542		C5_00430W_A	-6.93767
C1_07580C_A	10.5165		C1_10400C_A	-6.76624
C3_05750C_A	10.506		C3_06880W_A	-6.70742
C4_02190C_A	10.3105		CR_04680C_A	-6.68356
C5_04210C_A	10.2296		C1_04300C_A	-6.58633
C3_01060W_A	10.1728		CR_10540C_A	-6.35291
C1_01990W_A	10.086		C5_04940W_A	-6.28376
C1_02110C_A	10.0675		CR_01850C_A	-6.16136
CR_07700W_A	10.0135		C5_04110W_A	-6.03918
C4_02150C_A	9.98994		C4_02580W_A	-6.02761
CR_04220C_A	9.98273		C6_00230W_A	-5.85714
C2_02060C_A	9.74982		C1_05760C_A	-5.79234
C5_01360W_A	9.71829		C7_03780C_A	-5.71601
C7_03280C_A	9.59499		C1_04750W_A	-5.5209
C5_01260W_A	9.57931		C3_06180C_A	-5.46375
C1_02580W_A	9.42249		CR_06800C_A	-5.43341
C6_03600C_A	9.39974		CR_02020C_A	-5.41069
C1_05970W_A	9.31939		C1_01330C_A	-5.40345
C4_04400C_A	9.17151		C4_01800W_A	-5.38586
C2_07250C_A	9.14631		C6_01670W_A	-5.35956
C7_03740C_A	9.13295		C2_06590C_A	-5.34964
C1_05080W_A	9.12426		C1_06630W_A	-5.34822
CR_08880C_A	9.12157		C6_01810W_A	-5.29522
C6_04490W_A	9.10991		CR_02330C_A	-5.29522
C3_05630W_A	9.10069		C7_03410C_A	-5.27831
C1_13850C_A	9.0557		C4_06320C_A	-5.27218
C6_02100W_A	9.01964		CR_09680C_A	-5.27218
C7_02240W_A	8.97891		C3_02200W_A	-5.24805
C1_05920W_A	8.95645		C7_00380W_A	-5.20049
C6_02660C_A	8.8886		C2_01400C_A	-5.17702
C3_06040W_A	8.86998		C4_00730C_A	-5.17385
CR_08830W_A	8.84395		CR_00380W_A	-5.14241
C2_03640W_A	8.83961		C4_04770C_A	-5.08945
C4_02220C_A	8.83569		C1_08790W_A	-5.06537
C3_01930W_A	8.81307		C2_08590W_A	-5.06426
C1_06860W_A	8.78028		C5_03910C_A	-4.98507
CR_10320W_A	8.72835		CR_04400W_A	-4.87253
C4_02210W_A	8.72746		C3_04140C_A	-4.86663
C2_09800C_A	8.71977		C1_14120C_A	-4.83255
C1_11950W_A	8.69067		C1_08350C_A	-4.82765
C4_06980W_A	8.6401		C2_10310C_A	-4.7881
C3_05060W_A	8.6048		CR_03090C_A	-4.77868
C4_00120W_A	8.52347		C3_03130C_A	-4.76907
C2_01540W_A	8.47611		C1_06280C_A	-4.73352
C2_04470W_A	8.45089		C1_06880C_A	-4.73352
C5_04440C_A	8.43455		C1_12000C_A	-4.69877
C3_04000C_A	8.41897		CR_09940W_A	-4.66319
C7_03150W_A	8.34936		C4_00200C_A	-4.64614
C3_01230C_A	8.29653		C4_01530C_A	-4.62459
C4_02180C_A	8.24095		C1_10390C_A	-4.62202
C7_00180W_A	8.1966		C3_06460C_A	-4.54084
C1_04500W_A	8.18927		C3_02550C_A	-4.52236
CR_05940W_A	8.13639		C7_01560C_A	-4.52163
C4_05920C_A	8.11587		C1_11390W_A	-4.50119
C2_08890W_A	8.09894		C7_02520W_A	-4.50119
C3_00220W_A	8.07629		CR_10860C_A	-4.49404
C6_00070C_A	8.05329		C2_07140W_A	-4.48396
C1_01510W_A	7.9768		CR_05390W_A	-4.47125
C1_10550C_A	7.90391		C6_02080W_A	-4.47057
C1_05690C_A	7.87726		C6_02210W_A	-4.47057
CR_02750C_A	7.8611		C3_07150C_A	-4.44483
C2_09880C_A	7.84102		C2_01380W_A	-4.44389
C5_03060C_A	7.81254		C4_07090C_A	-4.41796
C2_04280W_A	7.78865		C4_06570C_A	-4.40334
C3_02750W_A	7.76714		C7_00990W_A	-4.3911
C1_10240C_A	7.72567		C1_02120C_A	-4.39068
C2_06680W_A	7.71222		CR_10270C_A	-4.36322
C4_05250W_A	7.56348		C3_01490W_A	-4.33708
C4_01850C_A	7.56188		C3_05240C_A	-4.31909
C4_00080C_A	7.55489		C3_04210W_A	-4.31841
C1_05890W_A	7.5467		C4_05720W_A	-4.31841
C1_14180W_A	7.54581		C7_02030W_A	-4.31738
C7_00290C_A	7.54224		C2_06810C_A	-4.28952
C6_02450W_A	7.53151		C1_00950C_A	-4.27172
CR_06460W_A	7.52546		C5_01570C_A	-4.24821
C5_01380W_A	7.51522		C2_02050C_A	-4.24818
C2_06550W_A	7.50438		C3_04960W_A	-4.24727
CR_07130C_A	7.46576		C1_06900C_A	-4.24251
C1_00190C_A	7.42297		C7_02770W_A	-4.2312
CR_05090C_A	7.40054		C2_05710C_A	-4.21339
C1_09580C_A	7.39919		C4_01690C_A	-4.20416
C5_04220W_A	7.33609		C1_02330C_A	-4.19215
CR_03670W_A	7.31443		C1_10870W_A	-4.18644
C4_04950W_A	7.29581		CR_08360C_A	-4.17323
CR_00620C_A	7.25123		C5_01540W_A	-4.16602
C2_10150W_A	7.22892		C1_11350C_A	-4.16353
C6_01440C_A	7.20557		C4_04890C_A	-4.15549
C5_04190W_A	7.19781		C1_06460C_A	-4.13784
C2_06990W_A	7.16834		C5_03070W_A	-4.13777
C6_01500C_A	7.10687		C1_12180C_A	-4.136
CR_01340W_A	7.0967		C2_02690W_A	-4.13398
C2_08340C_A	7.06828		C1_06470W_A	-4.13198
C4_04030W_A	6.9944		C1_06450C_A	-4.12387
CR_06310W_A	6.96385		C7_01790C_A	-4.12033
C2_09410W_A	6.93574		C3_03200C_A	-4.11653
C4_00230W_A	6.93235		C3_02110W_A	-4.11508
C3_05980C_A	6.932		C2_08040C_A	-4.1076
C1_05440C_A	6.93127		CR_07460C_A	-4.10115
C5_03750W_A	6.92612		C5_02890W_A	-4.09298
C4_03570W_A	6.92156		C2_10620W_A	-4.09286
C1_13100W_A	6.91465		C7_00970C_A	-4.07503
C7_02920W_A	6.86224		C3_02470C_A	-4.06394
C1_07640C_A	6.81331		C2_02910W_A	-4.05533
C1_08840W_A	6.80616		C2_06060C_A	-4.05533
C1_12850W_A	6.7882		C2_10020C_A	-4.05533
C2_04480W_A	6.77734		C6_01180C_A	-4.05392
C2_05990C_A	6.73336		C1_11060C_A	-4.04937
C1_08330C_A	6.72103		C2_05610C_A	-4.04926
C1_09690W_A	6.65649		C1_00800C_A	-4.04867
C6_04620C_A	6.64798		C1_00690W_A	-4.04527
CR_04820W_A	6.63827		C1_13150W_A	-4.02757
C5_03710C_A	6.61887		C1_01370C_A	-4.02564
C4_00430W_A	6.57505		C5_00740W_A	-4.02447
C4_03430W_A	6.56101		C5_04590C_A	-4.02216
C1_02270C_A	6.55534		C1_10800C_A	-4.01642
C1_11290W_A	6.55313		C5_01330W_A	-4.01378
C2_00660C_A	6.54419		C4_01050C_A	-4.00658
CR_06550C_A	6.51757		C1_11660W_A	-4.00562
C3_00400C_A	6.47935		C3_04680W_A	-3.99929
C2_10350C_A	6.43469		C6_01970C_A	-3.9899
C1_05620C_A	6.40595		C7_00960W_A	-3.97852
C6_03850C_A	6.37729		C4_01770W_A	-3.97686
C2_07580W_A	6.35832		C1_03110W_A	-3.95596
C2_05950C_A	6.35602		CR_03030C_A	-3.92661
C3_02660W_A	6.35512		C3_04670C_A	-3.92445
CR_05170C_A	6.35027		CR_01620C_A	-3.92422
C2_08050C_A	6.34129		C2_02880C_A	-3.91915
C5_04260W_A	6.33833		C1_03010W_A	-3.91792
C6_02620C_A	6.3187		C3_02700W_A	-3.89899
C5_05240C_A	6.30916		C1_05940W_A	-3.8928
C3_00650W_A	6.30184		C1_10820C_A	-3.88691
C1_10290W_A	6.29997		C3_00090W_A	-3.88037
C6_04200C_A	6.28174		CR_04100C_A	-3.87548
C4_03820C_A	6.25711		C2_03370W_A	-3.87001
C7_04320W_A	6.24102		C4_02610C_A	-3.86888
C1_09400C_A	6.23923		C4_00370W_A	-3.8503
C4_06380W_A	6.23194		C1_12390C_A	-3.84753
C6_01400W_A	6.22383		C1_03020C_A	-3.84196
C3_03610W_A	6.19536		C1_11650W_A	-3.8392
C1_02730W_A	6.19383		C5_02790C_A	-3.83752
C7_03550C_A	6.18808		C6_02240C_A	-3.83094
C6_03030W_A	6.08785		C1_03090W_A	-3.82496
CR_03480W_A	6.05179		C4_01270W_A	-3.81451
C1_11260C_A	6.04445		C3_03910W_A	-3.80516
C3_00810C_A	6.02471		CR_07630C_A	-3.79544
C3_07760C_A	5.95578		C1_12030W_A	-3.7898
C2_09280C_A	5.95195		C1_06890C_A	-3.78857
C4_03000C_A	5.9511		C5_00670C_A	-3.77409
C5_03730W_A	5.9487		C7_03920C_A	-3.76619
C3_02070C_A	5.945		C2_03960W_A	-3.75024
C7_03760W_A	5.93834		CR_08150W_A	-3.7362
C3_03490W_A	5.89153		C1_07430W_A	-3.73336
C7_02230W_A	5.89131		C1_11050W_A	-3.73336
C4_05780C_A	5.88785		C4_01480C_A	-3.73336
C7_03310W_A	5.86962		C4_03310C_A	-3.73336
C3_04840C_A	5.86775		C5_03880C_A	-3.73336
C5_04930C_A	5.85073		CR_07900C_A	-3.73336
C1_07980C_A	5.84786		C1_02480W_A	-3.73331
CR_00970W_A	5.84358		C1_02620C_A	-3.73034
CR_07250C_A	5.83708		CR_06660W_A	-3.7156
C3_04930C_A	5.82519		C7_02380C_A	-3.71106
CR_06510W_A	5.79081		C6_00210W_A	-3.70321
C1_13590W_A	5.78891		C3_05370C_A	-3.70111
C4_00980C_A	5.77754		C1_13050W_A	-3.68695
C6_03060W_A	5.77754		C2_01610C_A	-3.68687
C2_08090W_A	5.76783		C2_03810C_A	-3.67603
CR_06100C_A	5.76081		C1_03030W_A	-3.66791
C4_06530C_A	5.73898		C6_00160W_A	-3.66457
C1_01610C_A	5.73349		C1_10980W_A	-3.66331
C1_13440C_A	5.7171		C1_14370W_A	-3.66331
C3_04730C_A	5.71132		C2_01040W_A	-3.66331
C3_06580W_A	5.69406		C3_00990C_A	-3.66331
CR_03190C_A	5.64709		C3_01970C_A	-3.66331
CR_08310C_A	5.64344		C4_02650C_A	-3.66331
C2_06070W_A	5.63954		C5_00600C_A	-3.66331
C4_02500C_A	5.59783		C6_00730W_A	-3.66331
C1_03320C_A	5.59679		C7_01380W_A	-3.66331
C3_06660C_A	5.59125		C6_03790C_A	-3.66265
C6_01060C_A	5.58336		C1_09680W_A	-3.66077
C4_03710C_A	5.58156		C5_00650C_A	-3.64096
C1_10740C_A	5.57618		C1_01480C_A	-3.636
C2_08055W_A	5.57139		C4_04390W_A	-3.62756
C2_05360C_A	5.56763		C1_08410C_A	-3.62275
C2_10300C_A	5.54454		C6_00940C_A	-3.59622
C7_03110W_A	5.52584		C2_07180W_A	-3.5884
C2_05130W_A	5.51901		C4_01840C_A	-3.57845
CR_01220W_A	5.51894		C3_05200W_A	-3.56644
C1_06370C_A	5.51228		C3_00860W_A	-3.56543
C3_03570C_A	5.51228		CR_02690W_A	-3.55859
CR_03890W_A	5.51176		C2_07980W_A	-3.54587
C4_00290C_A	5.49891		C4_04900W_A	-3.53412
C3_02570W_A	5.46695		C7_00680W_A	-3.53067
C1_10170W_A	5.45183		C4_07180W_A	-3.5195
C1_05700W_A	5.44965		CR_02630C_A	-3.51513
C5_04560C_A	5.44421		C1_00120C_A	-3.51149
CR_01530C_A	5.43408		CR_01400W_A	-3.50241
C6_01490C_A	5.42082		C1_05110C_A	-3.49741
C4_00130W_A	5.388		C1_04180W_A	-3.47246
C5_03270W_A	5.36619		CR_08480C_A	-3.47142
CR_06580W_A	5.36065		CR_07390C_A	-3.4704
C4_00090W_A	5.35511		C1_00500C_A	-3.46467
C3_00140W_A	5.3514		C6_01860C_A	-3.46059
C6_00860W_A	5.34766		C1_01690C_A	-3.45086
CR_00220W_A	5.33455		C1_11990W_A	-3.45034
C1_04460C_A	5.30356		C7_01250W_A	-3.44794
C4_07000W_A	5.28329		C1_04170C_A	-3.4373
C1_11340W_A	5.27352		C4_01520C_A	-3.43382
C2_08690C_A	5.26481		C4_00270W_A	-3.43289
C5_00890C_A	5.25384		C1_07230W_A	-3.43158
CR_00150C_A	5.24631		C2_05410W_A	-3.42987
CR_08920W_A	5.23329		C1_02360C_A	-3.42597
CR_05320C_A	5.19742		C5_03540C_A	-3.42419
C4_03470C_A	5.19182		C5_03280W_A	-3.42417
C5_04010C_A	5.19118		C1_12320C_A	-3.4185
CR_00300W_A	5.18703		C6_02070C_A	-3.413
C4_03950C_A	5.18495		C1_11360W_A	-3.4113
C1_11890W_A	5.14344		C1_11470C_A	-3.40405
C4_06910W_A	5.14173		C1_06580W_A	-3.39116
C4_06970C_A	5.13156		C2_09430W_A	-3.39086
C4_01220C_A	5.1185		C7_01520W_A	-3.39002
C1_01780C_A	5.09999		C2_04230W_A	-3.38979
C6_00960W_A	5.09803		C1_13140C_A	-3.38846
C4_02380W_A	5.09724		C1_04240C_A	-3.38609
CR_03290C_A	5.09503		CR_10670W_A	-3.38441
C1_06430C_A	5.09281		CR_07010W_A	-3.37878
C4_06560W_A	5.09281		C2_08370C_A	-3.37526
C5_00710W_A	5.09281		C2_01740C_A	-3.37269
C6_03280W_A	5.09281		C3_04060C_A	-3.37133
CR_02900W_A	5.09281		C4_06490C_A	-3.36323
C2_06980W_A	5.08613		C4_04480C_A	-3.35366
C1_01220C_A	5.08138		C1_11040W_A	-3.34417
CR_04420C_A	5.07954		C7_01350C_A	-3.33468
C3_00180C_A	5.06731		C1_11180C_A	-3.31824
C3_03500W_A	5.0628		C6_04070C_A	-3.31824
C2_03120W_A	5.05931		C3_05100C_A	-3.31547
C6_03670C_A	5.04178		C2_04600C_A	-3.30791
CR_08670C_A	5.03744		C2_05460W_A	-3.30242
C1_00290W_A	5.03356		C1_10270C_A	-3.30116
C2_07630C_A	5.02521		C7_01600W_A	-3.28969
C4_04940W_A	5.01174		C3_01100W_A	-3.28939
C5_04250W_A	5.00601		C6_01700W_A	-3.28694
C1_02800W_A	5.0015		CR_00080W_A	-3.2855
C1_07290W_A	5.0015		C1_00180W_A	-3.28481
C1_01310W_A	4.99438		C2_06930C_A	-3.28429
C6_01070C_A	4.96136		C2_10200W_A	-3.28427
CR_09910W_A	4.95103		CR_07710W_A	-3.28405
C2_06700W_A	4.94879		C3_04660C_A	-3.24974
C2_00550W_A	4.89691		C7_00500W_A	-3.24844
C1_00780C_A	4.89385		CR_09350C_A	-3.24844
C1_01180C_A	4.8913		C1_10360C_A	-3.24587
CR_07300W_A	4.8913		C4_01700C_A	-3.24407
C4_07020C_A	4.88874		C6_02480W_A	-3.24236
C3_04020C_A	4.87798		C3_00760W_A	-3.23527
C2_10180W_A	4.87374		C4_02900C_A	-3.23081
C3_00930W_A	4.85735		C3_03900C_A	-3.22974
C4_00110C_A	4.85716		C4_01740W_A	-3.22607
CR_06860C_A	4.85061		C4_07110C_A	-3.22365
C4_03620C_A	4.83812		C2_01260W_A	-3.20481
C1_13470W_A	4.83231		C5_02780W_A	-3.19511
C7_04180W_A	4.82101		C3_04270C_A	-3.17413
C7_03860W_A	4.81911		C7_02660C_A	-3.17079
CR_09460C_A	4.81537		C2_08810C_A	-3.16202
C3_03690W_A	4.80767		C7_01640W_A	-3.15614
C2_03710W_A	4.78603		C2_09400C_A	-3.15344
C1_02690C_A	4.78029		C2_00210W_A	-3.14598
CR_09180W_A	4.77933		C3_06570C_A	-3.14575
C1_02670C_A	4.77752		CR_06340C_A	-3.13948
C2_08430C_A	4.77752		C1_07200W_A	-3.13012
C3_03020W_A	4.77752		C5_05320C_A	-3.12102
C4_03510C_A	4.77752		C2_03870W_A	-3.1208
C5_01670W_A	4.77752		C6_02500C_A	-3.12039
C6_02830W_A	4.77752		C7_00920C_A	-3.11011
C1_03470C_A	4.76643		C7_00620W_A	-3.10988
C1_09300C_A	4.76643		C7_01000C_A	-3.0979
C7_02280W_A	4.76643		CR_04530W_A	-3.09387
C3_01460C_A	4.76501		C1_12220W_A	-3.08802
CR_00930W_A	4.73936		C1_08880W_A	-3.08707
C1_06570W_A	4.73926		C6_03760C_A	-3.07276
C5_02690W_A	4.73856		C3_06870W_A	-3.068
C3_05040C_A	4.70351		C6_01980C_A	-3.06397
C4_06120W_A	4.70313		C3_04500C_A	-3.05833
CR_08990C_A	4.69653		C6_00420W_A	-3.0579
C1_09310C_A	4.67684		C6_03750C_A	-3.05676
C2_01650W_A	4.65702		C3_05770C_A	-3.04789
C1_10050W_A	4.654		C1_13790C_A	-3.03272
C3_00870W_A	4.65098		C7_00490C_A	-3.02401
C3_04600C_A	4.65098		C2_10430C_A	-3.02223
C6_01680C_A	4.64843		C1_12380C_A	-3.02062
CR_09850C_A	4.64796		C4_04150C_A	-3.01901
C1_09340C_A	4.64342		CR_04740C_A	-3.01768
C2_04910W_A	4.64191		C2_02030W_A	-3.01596
C2_07700C_A	4.62944		C2_07190C_A	-3.00985
C1_13630W_A	4.61858		C2_05250C_A	-3.00323
C1_00830W_A	4.6161		C7_00710W_A	-2.99803
C5_03870C_A	4.59857		C4_02370C_A	-2.99727
C3_03990C_A	4.59827		C3_06330W_A	-2.99519
C4_02360W_A	4.53285		C5_02470W_A	-2.9925
C2_00780W_A	4.52567		C1_08500C_A	-2.99081
C3_01960C_A	4.52551		C3_05530W_A	-2.98461
C4_04140W_A	4.51924		C1_05720W_A	-2.98335
CR_07550C_A	4.51559		C2_09020W_A	-2.96665
C3_06450W_A	4.51458		C1_02460W_A	-2.96555
C5_00410W_A	4.51227		CR_03060W_A	-2.9653
C6_02950C_A	4.51227		CR_01590C_A	-2.96395
C2_02220C_A	4.50562		C3_04810C_A	-2.96243
C7_01860W_A	4.49563		C6_02040W_A	-2.96112
C2_06270W_A	4.49195		C7_03250C_A	-2.95818
C2_05070W_A	4.48654		C5_02460C_A	-2.93525
C2_06690C_A	4.4844		C2_06760C_A	-2.93459
C6_00440C_A	4.44649		C2_07910C_A	-2.93202
C4_01940W_A	4.44418		C3_07810C_A	-2.93137
CR_03450W_A	4.44413		C1_04610W_A	-2.92934
C1_01980W_A	4.4303		C5_00130C_A	-2.92664
C3_03450C_A	4.41431		C1_06720C_A	-2.92461
C1_06810W_A	4.41236		C6_02560W_A	-2.92422
C3_04330C_A	4.41109		C3_06240C_A	-2.92252
C5_04470C_A	4.40861		C4_05020W_A	-2.91558
C3_04070C_A	4.40836		C5_02850W_A	-2.90867
CR_01200W_A	4.39947		C4_04820C_A	-2.90748
C2_00540W_A	4.38199		C1_07490C_A	-2.89666
C1_05520W_A	4.37475		C6_02200C_A	-2.89248
C2_06340W_A	4.37372		C1_12280C_A	-2.88963
C1_12140W_A	4.37358		C1_06690W_A	-2.88765
C1_07670W_A	4.36986		C6_01150W_A	-2.88693
C3_04570C_A	4.36986		C3_07700W_A	-2.88464
C7_03300C_A	4.35879		C7_02140W_A	-2.87956
C1_01840C_A	4.35628		C4_00450C_A	-2.87858
C7_02000C_A	4.3551		CR_07440W_A	-2.87836
C4_03640C_A	4.34767		C5_00850C_A	-2.87556
C2_00050C_A	4.34391		C1_05230W_A	-2.87256
CR_08690C_A	4.33745		C4_06580W_A	-2.87123
C1_04660W_A	4.33344		C1_10010C_A	-2.8659
C7_03690W_A	4.33084		C7_01800C_A	-2.85936
C1_05540C_A	4.32052		CR_08090W_A	-2.85779
C1_02530C_A	4.31055		C2_07420W_A	-2.84489
C2_05180W_A	4.30557		C6_03070C_A	-2.84366
C3_00210C_A	4.30516		C3_06010W_A	-2.84288
C1_06940C_A	4.27896		C3_06920W_A	-2.83857
CR_08720W_A	4.2607		C4_02870C_A	-2.83329
C5_04960W_A	4.2578		C7_02570C_A	-2.83183
C7_00630C_A	4.25265		C2_09180W_A	-2.83129
CR_09170C_A	4.24567		C1_13130C_A	-2.82326
CR_05570C_A	4.23808		C2_06770W_A	-2.81238
C2_06010W_A	4.20475		CR_06700C_A	-2.80789
C1_04690C_A	4.20378		C4_02270C_A	-2.80458
C5_05180W_A	4.20378		CR_07590W_A	-2.80192
C1_01440C_A	4.20157		C7_01190W_A	-2.80031
C2_00040C_A	4.19946		C2_03950W_A	-2.79207
C4_04990C_A	4.19818		C2_02270C_A	-2.78322
C2_08520C_A	4.19116		C1_01600W_A	-2.7808
C4_01860C_A	4.18942		C7_01440W_A	-2.77086
C3_00020W_A	4.18881		C2_04340C_A	-2.77018
C3_06130W_A	4.18701		C4_05390W_A	-2.76878
C4_06220C_A	4.18701		C1_13860C_A	-2.76853
C5_04230W_A	4.18701		C7_03670W_A	-2.76369
CR_03510W_A	4.18701		C1_11910W_A	-2.7577
CR_10200W_A	4.18701		C5_04270C_A	-2.75586
C5_00810C_A	4.18285		C7_00750W_A	-2.74736
C4_03540C_A	4.18013		CR_03170W_A	-2.74363
C2_07710W_A	4.17867		C1_02710W_A	-2.74242
C1_07220W_A	4.17043		C1_04400C_A	-2.74123
C1_09930W_A	4.17004		C1_14090W_A	-2.73952
C6_01310W_A	4.17004		C7_03650W_A	-2.73917
CR_04440C_A	4.17004		CR_04510W_A	-2.73609
CR_09220C_A	4.17004		C3_02150C_A	-2.73473
C2_02580W_A	4.16792		C1_09820C_A	-2.73226
C3_06940W_A	4.16474		CR_00790C_A	-2.73226
C6_03230W_A	4.16339		C1_11450C_A	-2.72575
CR_09140C_A	4.15213		CR_03950W_A	-2.72147
C5_01450W_A	4.13434		C2_05700W_A	-2.72075
C7_01910C_A	4.07291		C2_01270W_A	-2.71311
C1_11210C_A	4.06215		C1_08010W_A	-2.71307
C1_12470W_A	4.06039		C4_01360W_A	-2.70761
CR_03260W_A	4.05795		C2_07730W_A	-2.70711
CR_06590C_A	4.05782		C2_03820C_A	-2.70345
C2_01450C_A	4.05351		C6_01780C_A	-2.69942
C3_01900C_A	4.04428		C7_04210C_A	-2.6993
C2_08330W_A	4.01635		C6_03250W_A	-2.69725
C1_04050C_A	4.01112		CR_00860C_A	-2.69561
C1_09420W_A	4.01112		C1_10500W_A	-2.69389
C2_06140C_A	4.01112		C2_04460W_A	-2.6823
C2_09850C_A	4.01112		CR_03770C_A	-2.68212
C3_03240C_A	4.01112		CR_06150C_A	-2.67246
C5_03340W_A	4.01112		C2_03850W_A	-2.66458
C5_04980W_A	4.01112		C1_07330W_A	-2.6634
CR_01250C_A	4.01112		C3_07950C_A	-2.66196
C7_04160W_A	4.0091		C2_10070W_A	-2.66124
CR_04250W_A	4.00147		CR_02790C_A	-2.66055
CR_00610W_A	3.99709		C6_04610C_A	-2.6591
C2_00920W_A	3.99674		C4_01920W_A	-2.65674
C3_03700C_A	3.99199		C5_00820W_A	-2.64939
C2_00860C_A	3.99153		C5_03860W_A	-2.64543
C5_05220W_A	3.98954		C4_00960W_A	-2.64503
C3_01240C_A	3.98722		C3_07690C_A	-2.63734
C6_00450C_A	3.98722		C3_06980W_A	-2.63674
CR_09920W_A	3.98714		C1_14110C_A	-2.63312
CR_05250C_A	3.975		C4_02050W_A	-2.63225
C7_02190W_A	3.97337		C1_05260C_A	-2.63218
C7_01540W_A	3.97289		C1_11440C_A	-2.62995
C1_08530W_A	3.94475		C2_09640W_A	-2.62738
C6_03490C_A	3.9382		C6_03410C_A	-2.62674
C6_04410C_A	3.93499		C1_02600W_A	-2.62663
C3_05600W_A	3.90451		C5_03790W_A	-2.6239
C4_02020W_A	3.89638		C1_09190C_A	-2.61926
CR_04480C_A	3.8937		C2_05500W_A	-2.61586
C2_02550C_A	3.85275		C5_03820C_A	-2.61365
CR_03880W_A	3.84951		C3_07400W_A	-2.60963
C3_02900W_A	3.83673		C5_01230C_A	-2.60902
CR_06240C_A	3.82114		CR_01760C_A	-2.60145
C3_00190W_A	3.81625		C1_01640W_A	-2.59521
C1_11690W_A	3.81605		CR_04120C_A	-2.59182
C2_05060C_A	3.81393		C6_01530C_A	-2.58012
C3_02330C_A	3.81373		CR_02400W_A	-2.57291
CR_02920C_A	3.8128		CR_07470W_A	-2.55657
C2_09070C_A	3.79515		CR_00410W_A	-2.55261
C2_02530W_A	3.7887		C1_02440C_A	-2.54985
C2_02790C_A	3.7887		C6_03860C_A	-2.54539
C5_02130W_A	3.7887		C7_04230W_A	-2.54251
C6_01450C_A	3.78356		CR_00570W_A	-2.54127
C3_03460C_A	3.78063		C3_05570W_A	-2.54091
C2_01050W_A	3.77749		C3_07670W_A	-2.5393
C4_04190C_A	3.77749		C2_04950C_A	-2.53547
C3_07840C_A	3.77197		C1_06700W_A	-2.53464
CR_08970W_A	3.77197		C7_01650W_A	-2.53127
C7_02290W_A	3.76755		C2_01120W_A	-2.52803
C4_06550C_A	3.76642		C1_00170W_A	-2.52455
C6_04150W_A	3.76642		C4_04500C_A	-2.52445
CR_07260C_A	3.76642		CR_05790C_A	-2.51591
C3_00050C_A	3.76272		C3_02460C_A	-2.5158
C4_01180W_A	3.76083		C2_03160C_A	-2.51485
CR_04640W_A	3.76083		C2_06250C_A	-2.5127
CR_06350C_A	3.76083		C3_06050C_A	-2.50978
C3_01010W_A	3.75501		C5_05020C_A	-2.50158
CR_02780W_A	3.75501		C6_00650C_A	-2.49845
C3_05250C_A	3.7521		CR_05910W_A	-2.49795
CR_03580C_A	3.74361		C1_03190C_A	-2.49789
C2_03290W_A	3.74081		C4_00210W_A	-2.4967
C1_00390W_A	3.73513		C5_05010W_A	-2.48978
CR_03440W_A	3.73284		C4_06270C_A	-2.48722
C3_07590W_A	3.72606		C4_00520W_A	-2.48605
CR_05750W_A	3.71703		C1_01680C_A	-2.48495
C3_03980C_A	3.7027		CR_04810W_A	-2.48247
C6_03360C_A	3.69965		CR_01550C_A	-2.47862
C2_06880C_A	3.69765		C4_06290W_A	-2.47839
C1_13670W_A	3.69084		C7_00440C_A	-2.47665
C6_00080C_A	3.68021		CR_00900W_A	-2.47559
C1_08340C_A	3.66293		C5_01680C_A	-2.4738
C1_08190C_A	3.66085		C2_06210C_A	-2.47102
CR_10790W_A	3.66047		C3_03320W_A	-2.47004
C2_03610W_A	3.65918		CR_06490C_A	-2.46339
C2_04190C_A	3.65231		C6_03170C_A	-2.46114
C2_03020C_A	3.65171		C2_09590C_A	-2.45635
C2_08170W_A	3.65028		C2_07860W_A	-2.45176
C2_09820W_A	3.64293		C4_00650W_A	-2.44976
C3_02300W_A	3.64072		C6_03320W_A	-2.44652
C1_14060W_A	3.63026		C1_11790W_A	-2.44619
CR_00740C_A	3.61832		C3_01850W_A	-2.44282
CR_02470W_A	3.61063		C1_13020C_A	-2.44153
C7_00100W_A	3.60896		C6_02880W_A	-2.43828
C4_05070C_A	3.60636		CR_02110W_A	-2.43586
C2_01880C_A	3.59465		C1_03680W_A	-2.43503
C3_04200W_A	3.59219		C4_04430W_A	-2.43465
C3_06730W_A	3.5748		C5_00640C_A	-2.43405
C1_00270W_A	3.56334		C6_01380C_A	-2.42621
C1_05910W_A	3.56164		C4_06760W_A	-2.42592
C2_07430C_A	3.55734		CR_04090C_A	-2.42514
CR_06250W_A	3.5475		CR_09010C_A	-2.42494
C6_03560W_A	3.53596		C1_13260W_A	-2.42205
C1_00410C_A	3.53191		C7_02120C_A	-2.41973
C2_07620W_A	3.52565		C1_08380W_A	-2.41799
C3_06510C_A	3.52565		C5_03030W_A	-2.41631
C4_03420C_A	3.52565		C1_08320W_A	-2.41553
CR_01840W_A	3.52565		C1_11860W_A	-2.41098
CR_09030C_A	3.52565		CR_01650W_A	-2.41076
CR_09450C_A	3.52565		C4_05540W_A	-2.40354
C2_09810C_A	3.51678		C7_02100W_A	-2.40036
C6_04130C_A	3.51571		C1_13830C_A	-2.39766
C1_06260W_A	3.51224		C7_01220W_A	-2.3961
C2_03790C_A	3.51021		C2_07010W_A	-2.39224
C6_04600W_A	3.50872		C4_04720W_A	-2.39042
C1_14030W_A	3.50577		CR_01690C_A	-2.38881
C1_05450W_A	3.5056		C1_04770C_A	-2.38846
C3_04170W_A	3.50391		C5_00660C_A	-2.38744
C1_10150W_A	3.49892		C3_07340W_A	-2.38659
CR_09390C_A	3.49892		C1_06100C_A	-2.38496
C2_05860C_A	3.4948		C4_06710W_A	-2.38291
C1_13880C_A	3.49421		C6_02800W_A	-2.38244
C1_09700W_A	3.49198		C1_12610W_A	-2.38161
C1_11020W_A	3.49198		C5_04530W_A	-2.37797
C4_06300C_A	3.49198		C6_01610W_A	-2.37354
C5_02950C_A	3.49198		C2_10010C_A	-2.37074
CR_05420W_A	3.49198		C4_02280W_A	-2.36732
CR_07140C_A	3.49198		C1_09670C_A	-2.3671
C2_09420W_A	3.48719		C1_12370W_A	-2.36582
C4_00830W_A	3.48209		C2_08610W_A	-2.35875
C4_01100C_A	3.48174		C7_00370W_A	-2.3561
C5_03690W_A	3.4761		C1_08030W_A	-2.3542
C1_14130W_A	3.46565		C1_13120C_A	-2.34686
C1_02570C_A	3.46279		CR_09590W_A	-2.34374
C3_01250W_A	3.45696		CR_10400W_A	-2.34371
C1_14020W_A	3.42901		C5_00590W_A	-2.33779
CR_07730W_A	3.42829		C1_01580W_A	-2.33601
C2_08510W_A	3.4208		C1_02930C_A	-2.33346
C1_09770W_A	3.41465		C2_09060C_A	-2.33309
C2_00510W_A	3.41401		C1_12640W_A	-2.3279
C2_04110W_A	3.40768		C1_11870W_A	-2.32707
C5_02430W_A	3.39567		C2_05890C_A	-2.31986
C1_07080W_A	3.39286		C1_08400C_A	-2.3196
C4_01550C_A	3.38668		C5_05050W_A	-2.31673
C2_10780C_A	3.38141		CR_03720W_A	-2.31631
C1_02170C_A	3.37422		C1_10690W_A	-2.3143
C7_01680C_A	3.37094		C5_04990W_A	-2.31255
C4_03890W_A	3.36912		C1_07600W_A	-2.31003
CR_07920W_A	3.35556		C6_00750C_A	-2.30651
C4_04880W_A	3.35273		C1_13700W_A	-2.30477
C7_01990C_A	3.34858		C3_05330C_A	-2.30347
C3_04770C_A	3.34127		C1_13070C_A	-2.29894
C4_06620C_A	3.32917		CR_01930C_A	-2.29502
C6_02400W_A	3.32464		C3_00340W_A	-2.29344
C4_04080C_A	3.31742		C6_00870C_A	-2.29327
C6_02020C_A	3.31091		C3_02180C_A	-2.28919
C7_01760C_A	3.30869		C1_09720W_A	-2.28848
CR_03780C_A	3.303		C2_05420C_A	-2.28583
C4_06370C_A	3.30265		C2_02370C_A	-2.2825
CR_09610C_A	3.29432		CR_01900C_A	-2.27959
C1_01630W_A	3.2929		CR_10380C_A	-2.27959
C4_00860C_A	3.29188		C2_06190W_A	-2.27918
C2_03670W_A	3.29093		C5_01070C_A	-2.27901
CR_06500C_A	3.27971		C3_03050C_A	-2.27592
CR_02190C_A	3.27873		C2_05000C_A	-2.27478
C2_07720C_A	3.27522		C2_03270W_A	-2.27157
C2_05330C_A	3.27424		C7_03630C_A	-2.26897
CR_02800C_A	3.27246		C2_08530C_A	-2.26367
C2_08390W_A	3.27177		C1_05730W_A	-2.2606
CR_06110C_A	3.26739		C7_01970C_A	-2.25493
C5_03020W_A	3.26684		C4_05730W_A	-2.24634
C4_02340W_A	3.26046		C1_07610C_A	-2.24356
C3_07100C_A	3.25967		C4_00710W_A	-2.24051
C1_00850W_A	3.24779		C2_05290C_A	-2.23682
C2_00240C_A	3.24076		CR_06180W_A	-2.23431
C1_08170C_A	3.23246		CR_06080W_A	-2.23419
C1_12880C_A	3.22311		CR_09430C_A	-2.22978
CR_04630C_A	3.22304		C3_06750W_A	-2.22534
C6_03050C_A	3.22294		C2_00950C_A	-2.22524
C2_07770C_A	3.21561		C3_07970C_A	-2.22459
C1_13750C_A	3.20876		CR_08340W_A	-2.21459
C1_04350C_A	3.20774		C1_12240C_A	-2.21419
C1_02140C_A	3.20369		C4_05830W_A	-2.21112
C1_06000W_A	3.20369		C7_03720C_A	-2.20988
C1_07620C_A	3.20369		C2_05600W_A	-2.20763
C1_09410W_A	3.20369		C1_00070W_A	-2.20704
C1_12090C_A	3.20369		C3_01990W_A	-2.20266
C2_00460W_A	3.20369		C1_01520C_A	-2.19212
C2_04610C_A	3.20369		C4_01750C_A	-2.19207
C2_06840W_A	3.20369		C2_05190W_A	-2.19122
C3_00410C_A	3.20369		C5_03100C_A	-2.19049
C3_04310C_A	3.20369		C6_03080C_A	-2.18632
C3_07930C_A	3.20369		C2_08320C_A	-2.18144
C4_04020C_A	3.20369		CR_02770C_A	-2.17453
C4_06360C_A	3.20369		C1_00980W_A	-2.17177
C5_04040C_A	3.20369		C1_11800C_A	-2.16497
C6_02550W_A	3.20369		C1_04280C_A	-2.16272
C6_03500C_A	3.20369		C4_05430C_A	-2.1623
C7_02880C_A	3.20369		C1_02970W_A	-2.16174
C2_08830W_A	3.19901		CR_06770C_A	-2.15744
C1_11510C_A	3.19819		C4_03410W_A	-2.15501
C2_00670C_A	3.19527		C5_01700W_A	-2.15157
C2_06610C_A	3.19527		C2_07290W_A	-2.15156
C3_07510C_A	3.19527		C4_00140C_A	-2.15006
C1_08230C_A	3.19487		C1_00370W_A	-2.14932
C2_10540W_A	3.18774		C1_13030C_A	-2.14884
C1_07530W_A	3.18699		C3_03280C_A	-2.14651
C1_12460C_A	3.18699		C7_01160C_A	-2.14609
C4_00530C_A	3.18699		C2_03830W_A	-2.14535
C1_01930W_A	3.184		CR_04650W_A	-2.14513
C2_00180C_A	3.1767		C2_10110W_A	-2.14205
C4_02920W_A	3.1747		C6_03730C_A	-2.13884
CR_08470W_A	3.17347		C4_03200C_A	-2.13869
C3_04640W_A	3.17202		C4_06160W_A	-2.13782
C1_04270C_A	3.17006		C5_02820C_A	-2.13116
C1_06620C_A	3.17006		C2_04370W_A	-2.12974
C2_02850W_A	3.17006		C5_03370C_A	-2.12293
C2_06350C_A	3.17006		C3_01350C_A	-2.12011
C2_07280W_A	3.17006		C7_02340C_A	-2.11115
C2_08150W_A	3.17006		C2_08790W_A	-2.10854
C2_10730W_A	3.17006		C3_00460W_A	-2.10703
C3_00040W_A	3.17006		CR_08840C_A	-2.10662
C3_07720C_A	3.17006		C2_01430W_A	-2.1061
C4_02560C_A	3.17006		C2_10340W_A	-2.10449
C4_02820W_A	3.17006		C1_14160W_A	-2.10441
C5_04400W_A	3.17006		C4_06170C_A	-2.10022
C6_03090W_A	3.17006		C5_03050C_A	-2.09847
CR_00270C_A	3.17006		C5_05100C_A	-2.09754
CR_01640C_A	3.17006		C1_02370C_A	-2.09324
CR_01830C_A	3.17006		C6_03130W_A	-2.09125
CR_02290W_A	3.17006		C4_04410C_A	-2.0909
CR_02480W_A	3.17006		C4_01370W_A	-2.09062
CR_05580C_A	3.17006		C1_04600C_A	-2.09028
CR_06870C_A	3.17006		C5_02390C_A	-2.08874
C1_05330C_A	3.16914		CR_09830W_A	-2.08451
C4_06470W_A	3.16695		CR_00490W_A	-2.07774
C4_01070W_A	3.15932		C1_05300C_A	-2.07492
C4_00720W_A	3.15871		CR_06330C_A	-2.07392
C2_08980C_A	3.14415		CR_04780W_A	-2.07242
C4_05350W_A	3.14034		C3_03420C_A	-2.06423
C1_03330C_A	3.13596		C5_03000C_A	-2.06047
CR_06730W_A	3.12078		CR_10040W_A	-2.05866
C4_02490W_A	3.11393		CR_00920W_A	-2.05862
C6_03270C_A	3.11064		C1_03550C_A	-2.0538
C2_07070W_A	3.10788		C1_12340C_A	-2.05373
C6_01520W_A	3.09687		CR_02170W_A	-2.05321
C6_01620W_A	3.09157		C2_03090C_A	-2.05043
C4_04530C_A	3.08847		C2_03130W_A	-2.04955
C1_07030C_A	3.08677		CR_03280W_A	-2.03826
CR_05540C_A	3.08493		C2_00850W_A	-2.03825
C5_05510C_A	3.08317		C1_06070W_A	-2.0363
C7_00660W_A	3.08133		C1_12550C_A	-2.03348
C1_13160W_A	3.07906		C2_06970W_A	-2.032
C4_03300C_A	3.07626		C5_05040W_A	-2.02802
C1_09100W_A	3.07017		C1_14320C_A	-2.02485
C1_00670C_A	3.06751		C1_12770W_A	-2.02025
C4_04450C_A	3.06702		C2_09470C_A	-2.01856
C4_07040W_A	3.05337		CR_02180W_A	-2.01663
C5_02160W_A	3.04994		C1_00450C_A	-2.01569
C7_03470W_A	3.04901		C6_04520W_A	-2.01225
C1_02700C_A	3.04452		C1_07890C_A	-2.00841
C3_02270W_A	3.04316		C7_02840C_A	-2.00804
C2_00150W_A	3.04275		C2_09900C_A	-2.00422
CR_03590C_A	3.04227		C1_14230C_A	-2.00159
C3_02610C_A	3.0416		C7_00590W_A	-2.00134
C2_00940W_A	3.03549		C7_02890C_A	-1.99146
C2_01330C_A	3.03325		C4_02980W_A	-1.99121
C5_02110W_A	3.03181		C1_11170W_A	-1.9905
C5_05430W_A	3.03071		C3_01180C_A	-1.98772
C4_06990W_A	3.02851		C7_00950W_A	-1.98722
C2_03600W_A	3.02643		C5_02660C_A	-1.9857
C6_01710C_A	3.02199		C1_07510W_A	-1.98365
C3_03870C_A	3.02169		C2_04690C_A	-1.9824
CR_02220C_A	3.01896		C4_05360C_A	-1.97996
C4_05880W_A	3.01834		C4_04970C_A	-1.9753
C2_07760W_A	3.01774		C7_02680W_A	-1.9706
C2_10600W_A	3.01651		C5_04300C_A	-1.96991
C6_04430W_A	3.01152		C4_05960W_A	-1.96982
C5_01420W_A	3.00158		C4_04810C_A	-1.96675
C3_05170W_A	3.00093		C3_06690C_A	-1.96464
C4_04620C_A	3.00028		C1_02290C_A	-1.96285
C4_05440C_A	3.00025		C2_06890C_A	-1.96185
CR_02960W_A	2.97378		C3_00360W_A	-1.9616
C5_02910C_A	2.96681		CR_04580W_A	-1.96145
CR_06270W_A	2.96477		CR_03400W_A	-1.96125
C5_04490C_A	2.96405		C5_02860C_A	-1.96085
C4_02540W_A	2.96304		C4_01900C_A	-1.96057
C7_00740W_A	2.96196		C2_06960W_A	-1.95771
CR_00210W_A	2.96041		C4_05300W_A	-1.95533
C5_02080C_A	2.9576		C5_01690C_A	-1.95259
C6_01430C_A	2.95245		C3_02170C_A	-1.95237
CR_07270C_A	2.95239		C2_01590W_A	-1.94666
C5_03330C_A	2.94747		C1_04880C_A	-1.94656
CR_07220C_A	2.94742		C2_07600C_A	-1.94446
C5_00230C_A	2.94358		C4_00380W_A	-1.94441
C2_03690C_A	2.9405		C1_00590W_A	-1.94418
C1_11200W_A	2.93725		C5_00790C_A	-1.94215
CR_04150W_A	2.92874		C4_03900C_A	-1.94153
C6_00980C_A	2.92459		C2_09910C_A	-1.94114
CR_08860W_A	2.91581		C4_03380C_A	-1.93977
C1_05710C_A	2.91272		CR_05380C_A	-1.9394
C2_09150W_A	2.90961		C1_08590C_A	-1.93893
C6_00150W_A	2.90889		CR_02430C_A	-1.93663
CR_09960C_A	2.90642		C2_01620W_A	-1.93608
CR_03690W_A	2.90606		C2_01090C_A	-1.9346
C2_02390W_A	2.90013		C5_04620C_A	-1.93045
C4_05870C_A	2.89981		C3_03040W_A	-1.92698
CR_00290W_A	2.89889		C2_05690C_A	-1.92462
CR_04870C_A	2.89494		C1_04030W_A	-1.92305
C2_08700C_A	2.89478		C7_01490W_A	-1.91965
C3_02870C_A	2.89355		C1_07710C_A	-1.91884
CR_05050W_A	2.88883		C2_10270W_A	-1.91366
C1_13480W_A	2.88303		C7_00190W_A	-1.91224
C6_01010W_A	2.88003		C6_03390W_A	-1.91169
C4_00150C_A	2.87891		C2_05680W_A	-1.90543
CR_03730C_A	2.87704		C3_06590W_A	-1.9026
C3_03760W_A	2.87694		C7_01420W_A	-1.90119
CR_06260W_A	2.86995		CR_08370W_A	-1.90074
CR_06010W_A	2.86968		C2_02320C_A	-1.89968
C1_08310W_A	2.86464		CR_00510C_A	-1.89791
CR_07480W_A	2.85973		C2_02360C_A	-1.89493
C7_00130W_A	2.85482		C7_03330C_A	-1.89388
C6_00890W_A	2.85468		C2_06100W_A	-1.8935
C1_12860C_A	2.84775		C1_06650W_A	-1.89324
C3_02790W_A	2.844		C6_04080W_A	-1.893
C6_00490W_A	2.84142		C1_11120C_A	-1.89244
C6_01290C_A	2.83758		C1_06050C_A	-1.88866
C4_00680W_A	2.83713		C4_00660W_A	-1.88841
C1_03170C_A	2.83475		C1_03510C_A	-1.8871
C4_02330C_A	2.83426		CR_04600W_A	-1.88457
C4_04250W_A	2.8323		CR_06760C_A	-1.88359
C3_04720C_A	2.82641		C1_10940C_A	-1.88294
C1_10180C_A	2.82165		C5_01050C_A	-1.88287
C1_00880W_A	2.81601		C1_04820C_A	-1.87567
C1_11670W_A	2.81533		C4_04280C_A	-1.87427
C1_00580W_A	2.81437		CR_07400C_A	-1.87189
C2_02970C_A	2.80853		C5_05230C_A	-1.87169
C1_02980W_A	2.80725		C2_01030W_A	-1.8714
C4_04270W_A	2.80681		CR_05080W_A	-1.87055
C5_03080C_A	2.80355		C2_07380W_A	-1.8691
C7_04060W_A	2.80091		C4_03250C_A	-1.86784
C2_10870W_A	2.79753		C5_00030W_A	-1.86495
C1_14560C_A	2.79404		C7_00400W_A	-1.86251
C2_08400C_A	2.78846		C2_01410C_A	-1.85843
C2_10500W_A	2.78846		C1_13060C_A	-1.85788
C6_02820W_A	2.78846		C5_02400W_A	-1.85468
CR_09820C_A	2.78846		C2_03560C_A	-1.85265
C2_06600W_A	2.78811		C6_01900C_A	-1.85235
C4_01790W_A	2.78774		C1_11030W_A	-1.85215
C7_01700W_A	2.78743		CR_01310W_A	-1.84948
C2_03320W_A	2.77999		C1_09490C_A	-1.84946
C1_12560C_A	2.77746		C1_04890W_A	-1.84756
C2_03580W_A	2.77746		C4_03320W_A	-1.84748
C5_01030W_A	2.77746		CR_04010C_A	-1.84731
C5_03720C_A	2.77746		C7_00700W_A	-1.84402
C6_01940W_A	2.77571		C2_04590C_A	-1.84164
C5_04080C_A	2.77484		CR_07720C_A	-1.84117
C3_01370C_A	2.77314		CR_04770C_A	-1.84102
C7_01670W_A	2.77238		C2_01580W_A	-1.84039
C6_02440C_A	2.76941		C1_12210W_A	-1.8393
C1_01730W_A	2.7664		C3_02500W_A	-1.83874
C1_12020W_A	2.7664		C4_03840C_A	-1.83551
C2_07870C_A	2.7664		CR_01140C_A	-1.83542
C2_09540W_A	2.7664		C4_05310W_A	-1.83461
C1_14300C_A	2.76288		C3_03170W_A	-1.83407
C2_08920W_A	2.75968		CR_00480W_A	-1.83099
C3_01020W_A	2.75865		C2_00960C_A	-1.83016
C3_07370W_A	2.75802		C1_07930C_A	-1.82913
CR_01720W_A	2.75561		C6_03200W_A	-1.82779
C1_06300W_A	2.75525		C2_09550C_A	-1.82777
C2_08880W_A	2.75525		C3_02960C_A	-1.82501
C2_09080C_A	2.75525		C3_03390C_A	-1.82476
C3_01740C_A	2.75525		C6_02220W_A	-1.82453
C3_05500W_A	2.75525		C1_05680C_A	-1.81878
C4_05200C_A	2.75525		C7_01010W_A	-1.81603
C7_00480W_A	2.75525		C4_06110C_A	-1.81493
CR_00650W_A	2.75525		C1_04570C_A	-1.81492
CR_05280W_A	2.75525		C3_06830C_A	-1.8144
CR_06990W_A	2.75525		C3_04080W_A	-1.81179
C2_03500W_A	2.74792		C2_05400W_A	-1.81126
C3_05360C_A	2.74718		C1_01250W_A	-1.81006
C1_14340C_A	2.74655		C4_04780W_A	-1.80621
C3_00230C_A	2.74631		C5_04340W_A	-1.7947
CR_00140W_A	2.7428		C1_13680C_A	-1.79418
C5_00520W_A	2.74273		CR_01810C_A	-1.79306
C7_00770W_A	2.7422		C1_08740C_A	-1.79107
C4_06660W_A	2.74068		CR_04140W_A	-1.79081
C3_07030C_A	2.73717		C1_09630W_A	-1.7902
C2_03760C_A	2.73278		C6_04260C_A	-1.78962
C6_04310W_A	2.73102		C5_02410C_A	-1.78654
C3_07560W_A	2.72761		C6_04540C_A	-1.78469
C1_02810W_A	2.72286		CR_00430C_A	-1.78223
C7_00880C_A	2.72002		C1_07570C_A	-1.78202
C1_01040W_A	2.71735		C5_01960C_A	-1.78116
C1_11320C_A	2.71056		C2_00010W_A	-1.77907
CR_02130W_A	2.7101		C6_03400C_A	-1.77876
C2_05660W_A	2.70467		C4_05380C_A	-1.77855
C1_06230C_A	2.70183		C1_02190W_A	-1.77739
C1_06550W_A	2.70175		C4_06840W_A	-1.77728
CR_07170W_A	2.69662		C4_02680C_A	-1.77539
C5_03980W_A	2.69556		C7_03830C_A	-1.77448
C7_02500C_A	2.69045		C1_11880W_A	-1.76962
C3_06470W_A	2.68439		C1_07840W_A	-1.7693
C4_00480W_A	2.6821		C3_04950W_A	-1.76902
C1_09110W_A	2.6815		C5_03630C_A	-1.76649
C2_08620W_A	2.67809		C2_02680W_A	-1.76639
C2_09860C_A	2.67618		C2_05300C_A	-1.76587
C1_05870W_A	2.6695		C1_01770W_A	-1.7654
C7_02150C_A	2.66929		C7_01880C_A	-1.76413
C4_05000W_A	2.66653		C1_05530C_A	-1.76302
C5_02220C_A	2.66204		C1_08440C_A	-1.76262
CR_06020W_A	2.66181		C3_03270W_A	-1.76109
C2_01890W_A	2.66085		C4_01490W_A	-1.76083
C1_09440W_A	2.65812		C4_03730C_A	-1.75705
C2_09130C_A	2.65628		C2_02930C_A	-1.75567
C2_05810W_A	2.65552		C1_00220W_A	-1.75308
CR_04490C_A	2.65377		C3_01980C_A	-1.75274
C4_05400C_A	2.65204		C4_04700W_A	-1.75133
CR_10640W_A	2.65133		C4_01430C_A	-1.75091
C3_07160W_A	2.65102		C1_11500C_A	-1.74949
C3_07430W_A	2.64974		C1_00810W_A	-1.74825
C3_01280W_A	2.64468		CR_05360C_A	-1.74675
C7_00850W_A	2.63769		C3_00250C_A	-1.74539
C3_05270C_A	2.62788		C2_02740C_A	-1.74348
C3_01790C_A	2.62547		C1_08520C_A	-1.74297
C5_04370C_A	2.62481		CR_00250W_A	-1.7426
C4_04850C_A	2.62309		C5_05410C_A	-1.74087
C3_05290C_A	2.62285		C1_03130C_A	-1.74027
C1_11280W_A	2.62229		C7_03790W_A	-1.7394
C1_12100C_A	2.61635		C3_05150W_A	-1.73613
CR_02160W_A	2.6083		C6_02370C_A	-1.73415
C1_13250W_A	2.60787		CR_10250C_A	-1.73369
CR_05770W_A	2.60695		C6_02740W_A	-1.73296
CR_09700W_A	2.60492		CR_06050W_A	-1.73157
C2_04010C_A	2.60201		C5_04720C_A	-1.73026
C1_01460W_A	2.5988		C3_06640W_A	-1.72794
CR_02910W_A	2.59813		C5_03440W_A	-1.72736
C1_10000C_A	2.59756		C2_04160W_A	-1.7255
C1_04560W_A	2.59691		C1_02590C_A	-1.72491
C1_04650W_A	2.57856		C3_07390C_A	-1.72415
C7_03460W_A	2.57856		C2_04420W_A	-1.7239
C7_03290C_A	2.57573		C2_07300C_A	-1.72119
C2_02290C_A	2.57386		CR_01180W_A	-1.71924
C1_11140W_A	2.56409		C4_04920W_A	-1.71921
C2_01870C_A	2.5624		C5_03410C_A	-1.71475
CR_02850C_A	2.56221		C1_10160W_A	-1.71362
C3_06490W_A	2.56211		C4_02320C_A	-1.7135
CR_02210W_A	2.55822		C6_01540C_A	-1.71303
C1_09650W_A	2.55814		C5_04800W_A	-1.70995
C7_04280C_A	2.55768		CR_04570C_A	-1.7076
C1_03270W_A	2.55686		C2_03100W_A	-1.7061
C4_05770C_A	2.55461		C3_02780W_A	-1.70413
C3_05810C_A	2.54663		C1_09460W_A	-1.70363
C5_05360C_A	2.54594		C4_05450C_A	-1.70302
C1_00020C_A	2.54394		C5_03350W_A	-1.70223
C2_05740W_A	2.54355		C1_11760C_A	-1.70129
C4_07010C_A	2.53612		C1_07780W_A	-1.70124
C1_07990C_A	2.53272		C4_07200C_A	-1.70106
C1_04250C_A	2.53114		C1_01030W_A	-1.70072
C3_07330W_A	2.53096		C5_04700C_A	-1.70045
CR_03850W_A	2.52859		C1_11400C_A	-1.69784
C3_01320C_A	2.52641		C1_02100W_A	-1.69723
C5_02650C_A	2.52188		C1_12200W_A	-1.69677
CR_10610C_A	2.52177		C1_12760W_A	-1.69671
C2_08130W_A	2.51362		C1_10200C_A	-1.6958
C2_03030W_A	2.50928		C2_03980C_A	-1.69558
C3_00480C_A	2.50779		C3_06220C_A	-1.69412
CR_09150W_A	2.50688		C7_03060C_A	-1.69329
CR_07620W_A	2.50674		C1_04930C_A	-1.69242
CR_00980C_A	2.50583		C1_03620C_A	-1.69205
C1_05340C_A	2.50503		C4_05040W_A	-1.6913
C3_02630C_A	2.50366		C1_13940W_A	-1.6911
C3_00310C_A	2.49809		C7_03660C_A	-1.69089
C1_10770W_A	2.49801		CR_10240W_A	-1.69081
C4_05050C_A	2.49733		C1_02640C_A	-1.69016
C3_04190W_A	2.49669		C5_03380W_A	-1.68934
CR_00330C_A	2.49583		C1_01530C_A	-1.68758
C3_02850C_A	2.49549		C4_00890W_A	-1.68612
C1_12150C_A	2.49329		C7_04130C_A	-1.68387
C2_07230C_A	2.49304		C7_00350C_A	-1.6835
C1_03740W_A	2.49152		C2_00170C_A	-1.68208
C1_02250W_A	2.49077		C2_06290C_A	-1.6819
CR_02070C_A	2.49001		C3_01520C_A	-1.6818
C6_03150C_A	2.48424		C5_03850W_A	-1.68134
C5_03610W_A	2.48397		C6_01030W_A	-1.68015
C4_03960W_A	2.48256		CR_10490W_A	-1.67693
CR_00050W_A	2.46762		C1_02760W_A	-1.67673
C2_10230W_A	2.46761		C2_07490W_A	-1.66667
C3_04250W_A	2.46024		CR_09050C_A	-1.66658
CR_02280W_A	2.45966		C5_01140C_A	-1.66597
CR_08890C_A	2.45523		CR_02660C_A	-1.66575
CR_07160C_A	2.45141		C5_00110C_A	-1.66496
CR_00700W_A	2.44018		CR_01570W_A	-1.66392
C1_09180W_A	2.4369		C2_09490W_A	-1.66115
CR_08260C_A	2.43644		C3_00450C_A	-1.66052
C3_02810C_A	2.43614		C1_08430W_A	-1.65895
CR_06440C_A	2.43558		C4_02140C_A	-1.65834
C4_02660W_A	2.43554		C4_05850C_A	-1.65815
C5_03620W_A	2.4168		C6_04450W_A	-1.65786
C2_00760C_A	2.4127		C5_00320W_A	-1.6556
C1_11850W_A	2.41195		C4_03690C_A	-1.65391
C3_01300C_A	2.41088		C2_04790C_A	-1.65362
C7_00170W_A	2.40679		C2_03890W_A	-1.64926
C4_03810W_A	2.40627		C2_09830C_A	-1.64905
C1_04810W_A	2.40516		C5_05090W_A	-1.64826
C7_02200W_A	2.40303		C1_04830W_A	-1.64699
C6_01870C_A	2.39796		C1_02780W_A	-1.64502
CR_07910C_A	2.39756		CR_03270W_A	-1.63844
C3_07980C_A	2.39592		CR_00020W_A	-1.63843
C4_01090C_A	2.39585		C2_00810C_A	-1.6332
C3_04630W_A	2.39543		CR_01100C_A	-1.6323
C5_02350C_A	2.3911		C5_00630C_A	-1.63205
CR_08060C_A	2.38913		C7_00560C_A	-1.63062
C1_06520C_A	2.38841		C1_05290W_A	-1.62883
C4_02010C_A	2.38393		CR_02950C_A	-1.62782
C5_04870W_A	2.38282		CR_06190C_A	-1.62409
CR_05990C_A	2.37273		C5_00620W_A	-1.62286
C2_09010W_A	2.37157		C1_10490W_A	-1.62126
CR_05920C_A	2.36785		C4_05820W_A	-1.62037
C1_09000W_A	2.36357		C1_03840W_A	-1.61945
C1_08200W_A	2.36298		C4_03230C_A	-1.61932
C4_01630C_A	2.36229		C3_06120C_A	-1.61809
C4_00850C_A	2.35944		C4_04630C_A	-1.61644
C3_02060W_A	2.35478		C2_10710W_A	-1.61638
C1_01880C_A	2.34942		C7_01450C_A	-1.61601
C3_07080W_A	2.34921		C6_02130C_A	-1.61573
C3_06320W_A	2.3489		C2_07680W_A	-1.61537
C3_06350W_A	2.34656		C4_03070W_A	-1.61399
C1_01290C_A	2.34119		CR_09330C_A	-1.61391
C4_04360W_A	2.33488		C2_03990W_A	-1.61072
C2_04440W_A	2.33293		C5_05200C_A	-1.61063
C5_01240W_A	2.33069		C4_05290W_A	-1.60426
CR_05370W_A	2.3303		C4_01170C_A	-1.60393
C4_02030W_A	2.32677		C6_02960W_A	-1.60391
CR_04990C_A	2.3257		C7_01890C_A	-1.60214
CR_05190W_A	2.3257		C5_02140C_A	-1.60126
C2_05440W_A	2.3224		C1_02080W_A	-1.59965
C1_03770W_A	2.32141		C6_01880W_A	-1.59469
CR_02120C_A	2.32138		C7_03350C_A	-1.59228
C6_02420W_A	2.32054		C5_00080C_A	-1.59191
C3_04350C_A	2.30898		C3_03180C_A	-1.58803
C1_10340W_A	2.30741		C1_09150W_A	-1.58713
C4_02200C_A	2.29861		C6_04360C_A	-1.58529
C1_14190C_A	2.29588		CR_01370C_A	-1.58413
CR_02570C_A	2.29392		C1_14630C_A	-1.58313
C5_00750C_A	2.2913		C1_13370W_A	-1.58102
C3_06530W_A	2.29068		C2_03230C_A	-1.58092
C5_01390C_A	2.29029		C2_03470C_A	-1.57879
CR_09750C_A	2.28752		C2_06640C_A	-1.57786
C4_07220C_A	2.28692		C1_08100W_A	-1.57464
C3_03740W_A	2.28361		C3_00260C_A	-1.57404
C1_03000W_A	2.28021		C2_04030C_A	-1.57102
C1_03810C_A	2.27582		C3_02280C_A	-1.57062
C4_02740W_A	2.2734		CR_04200W_A	-1.5701
CR_09020C_A	2.27239		CR_10850C_A	-1.56884
C3_03480C_A	2.27216		C1_02180W_A	-1.56845
C6_00740W_A	2.27141		C3_04430W_A	-1.56807
C1_12290C_A	2.27103		CR_07320C_A	-1.56551
C1_14360C_A	2.26695		C4_03190W_A	-1.56545
C7_00080C_A	2.26146		C6_00760W_A	-1.56517
C2_06630C_A	2.26058		C1_02430C_A	-1.56273
C5_01740C_A	2.26011		C3_05120C_A	-1.56179
C1_05200C_A	2.25667		C3_05030W_A	-1.55926
C1_02010C_A	2.25204		C3_04980W_A	-1.55814
C2_05260W_A	2.2472		C1_11220C_A	-1.55517
CR_08870W_A	2.24675		C1_08920W_A	-1.55495
C4_04670C_A	2.24603		C2_06310C_A	-1.55185
C3_04750W_A	2.24264		C3_04420W_A	-1.55179
C4_06440C_A	2.23611		CR_04350C_A	-1.54625
C7_01170C_A	2.22469		C6_04230W_A	-1.54402
C1_13500C_A	2.22454		C2_04140W_A	-1.54301
CR_07110C_A	2.2235		C1_10960W_A	-1.54018
C7_03570W_A	2.22178		C1_09800C_A	-1.53951
CR_02650C_A	2.21605		C2_09780C_A	-1.53942
CR_02260C_A	2.20976		C3_04300C_A	-1.53864
CR_05490W_A	2.20855		C3_01450C_A	-1.5382
CR_02240C_A	2.20659		CR_09510C_A	-1.53765
C4_03460C_A	2.20574		C2_00610C_A	-1.53652
CR_10840C_A	2.20303		C1_01050C_A	-1.53628
C1_02540C_A	2.20301		CR_09580C_A	-1.53309
C1_07650W_A	2.20301		C2_07030C_A	-1.53287
C1_10850W_A	2.20301		C1_04420C_A	-1.53256
C2_02070W_A	2.20301		CR_08460W_A	-1.53018
C2_02560W_A	2.20301		CR_03110W_A	-1.52868
C2_05630C_A	2.20301		C5_00770C_A	-1.52522
C4_04690C_A	2.20301		C2_07320W_A	-1.52495
C7_01060W_A	2.20301		C1_08930C_A	-1.52257
CR_01510C_A	2.20301		C5_04550W_A	-1.52184
CR_04690C_A	2.20301		CR_02520W_A	-1.5211
CR_05270W_A	2.20301		CR_07050C_A	-1.51978
CR_05870W_A	2.20301		C5_03040W_A	-1.51819
CR_07990C_A	2.20301		C2_06790W_A	-1.51814
C4_02530W_A	2.19459		C4_04160W_A	-1.51767
C2_05770W_A	2.18796		C1_01350C_A	-1.51719
C2_03660W_A	2.18698		CR_02600W_A	-1.5161
C2_05010W_A	2.18698		C3_00720W_A	-1.51608
C3_02800W_A	2.18698		C5_04420W_A	-1.51481
C4_03340C_A	2.18698		C1_14310W_A	-1.50967
C5_03430W_A	2.18698		C4_01730C_A	-1.50522
C5_04480C_A	2.18698		C6_02920C_A	-1.5021
C7_01770W_A	2.18698
C1_13980C_A	2.18431
C4_02520C_A	2.18397
C3_02100W_A	2.18069
C4_03600C_A	2.18006
C2_07170C_A	2.17843
C1_14050C_A	2.17764
C3_02640C_A	2.17685
CR_02360W_A	2.17417
C1_02340C_A	2.17081
C1_04800C_A	2.17081
C1_13090W_A	2.17081
C2_04670W_A	2.17081
C2_07780W_A	2.17081
C2_08030W_A	2.17081
C4_01030W_A	2.17081
C4_01110W_A	2.17081
C4_04540C_A	2.17081
C5_02310C_A	2.17081
C5_02960C_A	2.17081
C7_00650W_A	2.17081
CR_04700C_A	2.17081
CR_05930C_A	2.17081
C1_05770C_A	2.1667
C1_05140W_A	2.16662
CR_10420W_A	2.16591
C3_06560W_A	2.16146
C5_03680W_A	2.15902
C2_05570C_A	2.15804
C3_03110W_A	2.15616
C7_00110W_A	2.15334
C1_11270W_A	2.15235
C7_03260C_A	2.1522
C2_05820W_A	2.15211
C2_00500W_A	2.14884
C2_06090W_A	2.13888
C2_07400C_A	2.13873
C1_13610C_A	2.13812
C1_09290C_A	2.13753
C7_00260C_A	2.13355
CR_00170W_A	2.13213
C6_04140C_A	2.13115
C4_01260W_A	2.12604
C6_00590W_A	2.12446
C5_04030W_A	2.12153
CR_01030W_A	2.12074
CR_03310C_A	2.11981
C7_03820C_A	2.11974
CR_01730W_A	2.11518
C6_03220W_A	2.11197
C3_03120C_A	2.11031
C1_00430W_A	2.11025
C2_02890W_A	2.1064
C2_08660C_A	2.10397
C1_03480C_A	2.10292
C1_04330W_A	2.10133
C1_01620C_A	2.10113
C5_03650C_A	2.10112
C3_04260W_A	2.09922
C4_04420W_A	2.09604
C6_04470C_A	2.09507
C5_01850C_A	2.0922
C5_01400W_A	2.091
C7_03680W_A	2.09087
CR_07680C_A	2.09023
C3_06770W_A	2.09001
C7_02020W_A	2.08894
C7_02370W_A	2.08151
C2_10570W_A	2.08098
C7_01960W_A	2.08067
C2_01660C_A	2.07801
CR_01280C_A	2.07356
C5_02680W_A	2.0732
C3_07830W_A	2.07242
C1_07320W_A	2.07238
C2_03570C_A	2.07209
CR_07290W_A	2.06557
C1_09220W_A	2.05991
C1_09170W_A	2.05834
C4_01590C_A	2.05676
C2_07820C_A	2.05636
C3_03530W_A	2.05156
C2_02920W_A	2.05018
CR_03960C_A	2.04844
C6_02970C_A	2.0469
C1_04940C_A	2.04646
C1_02950W_A	2.04627
C1_07900W_A	2.04623
C1_12870C_A	2.0453
C3_02910W_A	2.03844
C3_04790W_A	2.03053
C2_01210C_A	2.02829
CR_04860C_A	2.02809
C4_02750W_A	2.02805
CR_05330W_A	2.02734
C1_09540W_A	2.02732
C3_05450C_A	2.02696
CR_06600C_A	2.02694
C1_09360C_A	2.02536
C2_02600C_A	2.02456
C2_03620W_A	2.02186
C1_12130C_A	2.02119
C5_01920C_A	2.02083
C1_13820C_A	2.0203
C1_10730W_A	2.01817
C3_03370C_A	2.01758
CR_10430C_A	2.01416
C4_05840W_A	2.01236
C5_00240W_A	2.00824
C7_02220C_A	2.00487
C7_01730C_A	2.00293
C2_00880W_A	2.0021
CR_07280W_A	2.00048
C1_09550W_A	1.99881
C3_02890C_A	1.99576
C6_03780C_A	1.98606
C6_02790C_A	1.98537
C7_01920W_A	1.98297
CR_09480W_A	1.9816
C5_01830C_A	1.97708
C3_06620W_A	1.97103
CR_02810W_A	1.96417
C2_09220W_A	1.96412
C3_00980W_A	1.96221
C6_03800C_A	1.96014
C4_01420W_A	1.95638
C6_01330C_A	1.95038
C3_07270C_A	1.94942
C2_00250W_A	1.94758
C4_06200W_A	1.94703
C1_09250W_A	1.94096
C4_02040W_A	1.93754
C6_01740C_A	1.93613
C1_10140C_A	1.93463
C1_03490W_A	1.93392
C4_04560C_A	1.93318
C1_09780C_A	1.932
C6_04380W_A	1.93129
C2_01150W_A	1.93127
CR_10070C_A	1.93094
C1_04640W_A	1.9275
CR_01090W_A	1.92688
C1_07810C_A	1.92177
C2_00080C_A	1.91863
C2_03840C_A	1.91743
C5_00140C_A	1.91681
C5_01440C_A	1.91517
C1_09160W_A	1.91276
CR_08770W_A	1.91175
C2_04520C_A	1.91133
C4_06090C_A	1.90875
C4_01240C_A	1.90546
C5_01270W_A	1.90484
C4_01130C_A	1.90287
C1_00550W_A	1.89739
C6_00790C_A	1.89721
CR_04930W_A	1.89636
C2_04620W_A	1.89607
CR_06320C_A	1.89555
C1_08570C_A	1.89415
C5_03670C_A	1.88953
CR_01800C_A	1.88814
C2_09110C_A	1.88797
C5_01950C_A	1.88287
C2_09000C_A	1.88095
C3_00750W_A	1.87984
C2_06710W_A	1.87876
CR_05020W_A	1.87841
C1_05840W_A	1.87716
C3_05380W_A	1.87379
C4_01390W_A	1.87327
C2_06020W_A	1.87238
C1_06400C_A	1.87127
C6_02750C_A	1.87017
C1_05980W_A	1.86348
C1_08780W_A	1.86094
CR_04290W_A	1.86057
C4_02760C_A	1.85796
C1_01890C_A	1.85467
CR_07060C_A	1.85379
C1_13740W_A	1.85209
C3_06100C_A	1.85076
C1_02890C_A	1.84817
C2_06870C_A	1.84527
C1_03260W_A	1.84454
C3_01420C_A	1.84445
C2_04100W_A	1.84368
C7_02420C_A	1.84265
C2_05380W_A	1.84178
C1_00570C_A	1.8409
C5_05460C_A	1.84032
C4_06730C_A	1.83933
C1_09120W_A	1.839
C1_08620W_A	1.83749
C2_01920C_A	1.83715
C1_09320C_A	1.83477
C2_01680C_A	1.83137
C4_01290W_A	1.82989
C2_10650W_A	1.82953
C2_03150C_A	1.82942
CR_04940W_A	1.82899
C7_01150W_A	1.82786
CR_00200W_A	1.82679
C7_02800W_A	1.82579
C3_07090W_A	1.82099
C2_07020C_A	1.81882
C2_02180W_A	1.81826
C1_05600W_A	1.81816
CR_09410W_A	1.81603
C2_00690W_A	1.81442
CR_01210C_A	1.81103
C1_08950W_A	1.80505
C5_04970C_A	1.80324
C3_05540C_A	1.80245
C3_07290W_A	1.79924
C4_06480C_A	1.79913
C5_03260C_A	1.79719
C4_06020C_A	1.79645
CR_06060W_A	1.79584
C1_08580C_A	1.79346
C6_02720C_A	1.79087
C4_02310W_A	1.78486
C3_04920C_A	1.78483
CR_01630C_A	1.78437
C6_01600W_A	1.78395
C4_04380C_A	1.78345
CR_03220C_A	1.78273
C3_05110W_A	1.78239
C2_02240C_A	1.77855
C2_02110C_A	1.77576
C4_03020W_A	1.77523
CR_03500W_A	1.77329
C4_00760W_A	1.77297
C2_04300C_A	1.7706
CR_10310W_A	1.76808
C2_03770C_A	1.76695
C4_00320C_A	1.76672
CR_10480W_A	1.7663
C4_02170C_A	1.76586
C1_04900W_A	1.76569
C3_04800C_A	1.76543
C7_03140W_A	1.76419
C7_03360W_A	1.7632
C3_03470W_A	1.76191
C1_13600W_A	1.76191
C5_00910C_A	1.7613
C2_00330C_A	1.75962
C2_02250C_A	1.75952
C4_06430C_A	1.75932
C2_00640W_A	1.75652
C6_02340W_A	1.75351
CR_02350C_A	1.75249
C2_07900W_A	1.7513
C5_05390C_A	1.75092
C1_13970C_A	1.75081
CR_04830C_A	1.74882
C3_04480C_A	1.74819
C3_00440W_A	1.74771
C2_10480W_A	1.74691
C2_04000C_A	1.746
C1_08900W_A	1.74372
CR_09570W_A	1.7428
C3_07460W_A	1.73917
C4_00070C_A	1.73878
C1_02390W_A	1.73744
C1_03960C_A	1.73715
C1_00860W_A	1.73695
C1_12120W_A	1.7342
C3_07790W_A	1.73419
C2_00450C_A	1.73384
CR_00310C_A	1.73282
C3_00500C_A	1.73251
C3_07870W_A	1.73171
C2_00130W_A	1.73154
C4_04000W_A	1.73098
C4_04010W_A	1.73051
CR_03700C_A	1.73046
C7_02540W_A	1.73021
C4_01930C_A	1.72763
C7_03580C_A	1.72555
C2_05310C_A	1.72382
CR_00420W_A	1.72354
C1_00680W_A	1.72018
C3_02220W_A	1.71867
CR_09780C_A	1.71846
C2_08420W_A	1.71824
C4_01780C_A	1.71758
C1_12530C_A	1.71747
C6_03530C_A	1.71518
CR_10720W_A	1.71483
C3_07110W_A	1.71448
C2_00350W_A	1.71425
C4_02670W_A	1.71315
CR_02460W_A	1.71247
C7_00510W_A	1.71244
C2_02860W_A	1.71085
C6_03700W_A	1.70993
C2_09120C_A	1.70792
C3_04160W_A	1.70792
C1_06120C_A	1.70758
C6_02860W_A	1.70442
C2_08820C_A	1.70303
C2_08450W_A	1.70281
CR_08700C_A	1.7024
C6_04590C_A	1.69986
CR_01000C_A	1.69798
C7_02090C_A	1.69496
CR_07890W_A	1.69494
C1_07560W_A	1.69186
C1_13410W_A	1.6914
C2_06780C_A	1.69001
CR_03710C_A	1.6899
C2_08640C_A	1.68764
C2_01990C_A	1.68514
C3_06520C_A	1.68449
CR_07100W_A	1.6837
C7_01780W_A	1.68335
CR_06230W_A	1.68196
C7_04110W_A	1.6784
CR_00040C_A	1.67689
C3_03000W_A	1.67475
C1_00420W_A	1.67151
C4_06310C_A	1.67129
C1_10310W_A	1.66892
C1_08040W_A	1.66858
C1_03670C_A	1.66711
C2_08010W_A	1.66602
C4_05800C_A	1.66501
C7_02160W_A	1.66474
C2_02820C_A	1.66298
C3_01800C_A	1.65815
C3_02990C_A	1.6559
CR_09440C_A	1.65125
C3_04880W_A	1.65018
C2_06260W_A	1.64873
C3_07730W_A	1.64691
C4_04470W_A	1.64428
C2_09770C_A	1.64421
C2_05140W_A	1.64398
CR_10230W_A	1.64215
C1_06010W_A	1.64207
C7_02980C_A	1.64163
C7_02490W_A	1.64113
C4_05940W_A	1.64098
C1_09200W_A	1.63978
C2_04060C_A	1.63722
C5_05190W_A	1.63599
CR_02390W_A	1.6354
CR_01190C_A	1.63395
C5_01430C_A	1.63122
C4_04980W_A	1.6312
C5_02540C_A	1.62878
C1_02910C_A	1.62865
C7_00840C_A	1.62844
C2_01560W_A	1.62795
C5_02970W_A	1.62764
CR_02670C_A	1.62646
C4_05970W_A	1.6218
C6_03840C_A	1.62154
C1_09920W_A	1.62028
C2_06300W_A	1.6198
CR_04790W_A	1.61948
C1_01810C_A	1.61775
C1_10230C_A	1.61278
C1_07110W_A	1.61276
C1_05510C_A	1.61064
C5_05370C_A	1.60969
C2_02400W_A	1.60841
C1_13390W_A	1.60762
C4_00040W_A	1.60226
C1_03870C_A	1.60103
C6_01790C_A	1.59863
CR_05140W_A	1.59801
CR_01790C_A	1.59501
C1_02220C_A	1.59412
C3_05970C_A	1.59215
C1_09090C_A	1.5871
C2_00770W_A	1.58617
C3_07450C_A	1.58527
C1_12250C_A	1.58511
C4_00950C_A	1.585
C1_03660W_A	1.58231
C5_03010W_A	1.58172
C3_06210C_A	1.57989
C4_04550C_A	1.57948
C3_05990C_A	1.57703
C3_06720W_A	1.576
CR_02300C_A	1.57586
C2_00270C_A	1.57562
C1_04060W_A	1.57534
C2_05620W_A	1.5741
C3_02560W_A	1.57407
CR_06930W_A	1.5682
C2_00200W_A	1.56659
C1_04700C_A	1.5651
C6_03710W_A	1.56429
C3_02120W_A	1.55965
C3_02860W_A	1.5577
C3_06790W_A	1.55265
CR_05640C_A	1.55207
C1_05950C_A	1.55168
C1_04470C_A	1.55087
C6_04580W_A	1.55011
C6_03290W_A	1.55007
C5_01840C_A	1.54631
C3_04650W_A	1.54549
C7_01230C_A	1.5441
C2_07440C_A	1.54355
C4_02720C_A	1.54328
C1_01920W_A	1.54262
C4_06890W_A	1.54102
C3_01220W_A	1.54046
CR_09190C_A	1.53941
C2_04050C_A	1.53667
C4_02700W_A	1.53657
C6_00250W_A	1.53581
C3_03890W_A	1.53523
C2_09480W_A	1.5336
C7_03490W_A	1.53288
C7_00060C_A	1.53161
C4_02640C_A	1.53118
C7_03870W_A	1.5308
C5_04200W_A	1.52997
C1_00310W_A	1.52881
C7_01720W_A	1.52591
C2_04070C_A	1.52316
C1_01750W_A	1.52291
CR_10160W_A	1.52236
C4_06780C_A	1.522
CR_05240C_A	1.52133
C2_04940C_A	1.52091
C4_03920W_A	1.5201
C1_12270W_A	1.51932
C1_07380C_A	1.51186
C7_02170C_A	1.5106
CR_01420W_A	1.51047
C7_01740C_A	1.51017
C2_03250W_A	1.50786
C5_00560W_A	1.50052

## Sheet: UP-categorisation
Genes upregulated in ILS1 biofilm
GOID	GO term	Frequency	Gene(s)	Organism
6950	response to stress	27 out of 133 genes, 20.3%	SOD5 HSP70 MEP1 CDC47 PST3 RTA3 MET6 TSA1 PST2 DDR48 WH11 MCM3 MCM2 MLT1 CDC46 RTA2 GST2 CIP1 GAD1 MCM6 SOD1 HGT12 MCR1 ECM33 CAS5 HSP90 YNK1	Candida albicans
50789	regulation of biological process	26 out of 133 genes, 19.5%	HSP70 PGA13 CDC47 PST3 RTA3 MET6 TSA1 PST2 STP4 CR_02430C_A MCM3 CYP1 C4_02720C_A MCM2 SIM1 RPS21 CDC46 GST2 ARG5,6 SOD1 CLN3 EFB1 URA2 C1_03790C_A CAS5 HSP90	Candida albicans
6810	transport	25 out of 133 genes, 18.8%	FLU1 HSP70 MEP1 CAN1 ZUO1 C6_03540W_A RPS26A ALP1 MAL31 PHO89 RPS5 MUP1 MLT1 JEN1 CR_07080W_A RPS21 RTA2 GNP1 TEF1 C3_03440C_A HGT12 GAP1 YMC1 GAP5 EGD2	Candida albicans
42221	response to chemical	23 out of 133 genes, 17.3%	HIS5 SOD5 FLU1 HSP70 PST3 TSA1 PST2 PGA31 DDR48 RTA2 GST2 CIP1 GAD1 C3_03440C_A SOD1 HGT12 CLN3 GAP1 MCR1 YMC1 CAS5 HSP90 C3_02850C_A	Candida albicans
44419	interspecies interaction between organisms	21 out of 133 genes, 15.8%	SOD5 FLU1 HSP70 MTS1 PST3 MET6 TSA1 PST2 WH11 EAP1 MLT1 HYR1 TEF1 HWP1 CSH1 SOD1 HIS4 ECM33 CAS5 ECE1 HSP90	Candida albicans
6996	organelle organization	20 out of 133 genes, 15.0%	C5_01540W_A RPL5 CDC47 UBI3 PST3 RPS26A MCM3 CYP1 RPP0 C4_02720C_A CR_07080W_A SIM1 CDC46 TEF1 RPL12 MCM6 CLN3 RPS14B C1_03790C_A HSP90	Candida albicans
6412	translation	19 out of 133 genes, 14.3%	C5_01540W_A RPL5 ZUO1 UBI3 RPS26A ACO2 RPL19A RPP0 RPS5 RPS21 TEF1 ARC1 RPL12 RPL10A RPL35 RPL43A EFB1 RPS14B RPS1	Candida albicans
30447	filamentous growth	15 out of 133 genes, 11.3%	MTS1 PGA13 TSA1 STP4 DDR48 MLT1 SOD1 HGT12 CLN3 GAP1 ECM33 CHA1 CAS5 HSP90 YNK1	Candida albicans
42254	ribosome biogenesis	15 out of 133 genes, 11.3%	C5_01540W_A RPL5 ZUO1 UBI3 C3_06760W_A RPS26A CR_10470C_A RPP0 RPS5 CR_07080W_A RPS21 RPL12 RPL35 RPS14B RPS1	Candida albicans
9405	pathogenesis	14 out of 133 genes, 10.5%	SOD5 FLU1 MTS1 PST3 PST2 WH11 MLT1 HWP1 CSH1 SOD1 ECM33 CAS5 ECE1 HSP90	Candida albicans
8150	biological_process	14 out of 133 genes, 10.5%	C1_04470C_A C3_07920W_A C5_01110W_A C6_02100W_A GST3 CR_06500C_A C4_01340W_A C1_09520C_A CR_06510W_A C4_01330W_A CR_06580W_A C5_01090C_A CR_10320W_A C7_00770W_A	Candida albicans
16070	RNA metabolic process	11 out of 133 genes, 8.3%	C5_01540W_A ZUO1 UBI3 C3_06760W_A CR_10470C_A CR_07080W_A ARC1 RPL35 TRM1 RPS14B RPS1	Candida albicans
71555	cell wall organization	10 out of 133 genes, 7.5%	PGA13 TSA1 PGA31 SIM1 C1_14060W_A CRH11 HWP1 SOD1 ECM33 CAS5	Candida albicans
42493	response to drug	10 out of 133 genes, 7.5%	FLU1 TSA1 PGA31 RTA2 C3_03440C_A CLN3 GAP1 YMC1 CAS5 HSP90	Candida albicans
42710	biofilm formation	9 out of 133 genes, 6.8%	WH11 EAP1 PBR1 HYR1 HWP1 CSH1 ECM33 CAS5 ECE1	Candida albicans
6629	lipid metabolic process	9 out of 133 genes, 6.8%	MTS1 DPP3 C1_00470C_A SAH1 FAD3 RTA2 SOD1 MCR1 C3_02850C_A	Candida albicans
7049	cell cycle	8 out of 133 genes, 6.0%	CDC47 MCM3 CYP1 MCM2 CDC46 MCM6 CLN3 C1_03790C_A	Candida albicans
6259	DNA metabolic process	8 out of 133 genes, 6.0%	CDC47 TSA1 DDR48 MCM3 MCM2 CDC46 MCM6 HSP90	Candida albicans
6457	protein folding	7 out of 133 genes, 5.3%	HSP70 ZUO1 TSA1 CYP1 C1_03790C_A EGD2 HSP90	Candida albicans
7155	cell adhesion	5 out of 133 genes, 3.8%	EAP1 PBR1 HWP1 CSH1 HIS4	Candida albicans
6091	generation of precursor metabolites and energy	3 out of 133 genes, 2.3%	MRF1 ACO2 C3_02850C_A	Candida albicans
6464	cellular protein modification process	3 out of 133 genes, 2.3%	UBI3 CYP1 YNK1	Candida albicans
7010	cytoskeleton organization	2 out of 133 genes, 1.5%	C4_02720C_A TEF1	Candida albicans
45333	cellular respiration	2 out of 133 genes, 1.5%	MRF1 ACO2	Candida albicans
30448	hyphal growth	2 out of 133 genes, 1.5%	CLN3 YNK1	Candida albicans
5975	carbohydrate metabolic process	2 out of 133 genes, 1.5%	C1_14060W_A CRH11	Candida albicans
7165	signal transduction	2 out of 133 genes, 1.5%	C4_02720C_A HSP90	Candida albicans
19725	cellular homeostasis	2 out of 133 genes, 1.5%	TSA1 SOD1	Candida albicans
746	conjugation	1 out of 133 genes, 0.8%	C1_14060W_A	Candida albicans
48468	cell development	1 out of 133 genes, 0.8%	CYP1	Candida albicans
7114	cell budding	1 out of 133 genes, 0.8%	CLN3	Candida albicans
6766	vitamin metabolic process	1 out of 133 genes, 0.8%	SNZ1	Candida albicans
7124	pseudohyphal growth	0 out of 133 genes, 0%	none
910	cytokinesis	0 out of 133 genes, 0%	none
30163	protein catabolic process	0 out of 133 genes, 0%	none
70783	growth of unicellular organism as a thread of attached cells	0 out of 133 genes, 0%	none
32196	transposition	0 out of 133 genes, 0%	none
16192	vesicle-mediated transport	0 out of 133 genes, 0%	none
6997	nucleus organization	0 out of 133 genes, 0%	none
other	other	25 out of 133 genes, 18.8%	C7_04210C_A LYS9 ARG3 ASN1 SER33 LYS1 ARO3 ARO2 CPA2 LYS4 GLY1 TRP5 TRP4 LYS22 CPA1 DAO2 HIS1 C7_02100W_A CR_10170C_A ARO4 IFG3 GDH2 SAM4 LYS12 MIS12	Candida albicans
The genes upregulated (1.5 cut off) were categorized using the Process Ontology in the CGD Gene Ontology Slim Mapper

## Sheet: Down-categorisation
Genes downregulated in ILS1 biofilm
GOID	GO term	Frequency	Gene(s)	Organism
50789	regulation of biological process	22 out of 86 genes, 25.6%	WOR4 UGA3 DBF2 SEF2 HIR1 ATX1 ZCF2 TCC1 FGR15 WOR2 HAP43 RFG1 MHP1 CR_09520C_A LTE1 AAF1 WOR3 STE11 C1_09320C_A WHI3 SGO1 PTP2	Candida albicans
8150	biological_process	18 out of 86 genes, 20.9%	C1_08900W_A C1_03750W_A CR_03250C_A C1_11320C_A CR_08420W_A C1_02730W_A CR_05540C_A CR_09460C_A C2_08700C_A C2_06740W_A C6_03670C_A C1_05540C_A C6_03370W_A CR_00310C_A C5_02680W_A C4_07080C_A CR_07820W_A C3_04840C_A	Candida albicans
30447	filamentous growth	15 out of 86 genes, 17.4%	DBF2 HIR1 ZCF2 TCC1 FGR15 FGR23 WOR2 RFG1 MHP1 AAF1 STE11 SLR1 WHI3 CR_03260W_A IRO1	Candida albicans
6810	transport	15 out of 86 genes, 17.4%	SFC1 ATX1 CFL4 TNA1 ITR1 C3_03690W_A NGT1 HGT6 FTR1 FEN1 CRP1 ROA1 CR_09520C_A LTE1 QDR3	Candida albicans
42221	response to chemical	13 out of 86 genes, 15.1%	UGA3 SFC1 SEF2 C2_05060C_A PGA4 ATX1 ZCF2 TNA1 HAP43 ROA1 STE11 FET31 QDR3	Candida albicans
7049	cell cycle	12 out of 86 genes, 14%	DBF2 HIR1 C1_07980C_A KIP1 NUF2 PGA4 MIF2 C3_07110W_A CR_09520C_A STE11 SGO1 QDR3	Candida albicans
44419	interspecies interaction between organisms	12 out of 86 genes, 14%	UGA3 LIP4 TCC1 CRG1 FTR1 HAP43 RFG1 AAF1 STE11 SLR1 IRO1 ICL1	Candida albicans
6996	organelle organization	11 out of 86 genes, 12.8%	C1_08610C_A DBF2 HIR1 C1_07980C_A KIP1 NUF2 MIF2 C3_07110W_A CR_09520C_A C1_07360W_A SGO1	Candida albicans
6950	response to stress	11 out of 86 genes, 12.8%	C1_07980C_A C2_05060C_A PGA4 ATX1 FGR15 FGR23 FTR1 HAP43 RFG1 MHP1 STE11	Candida albicans
9405	pathogenesis	9 out of 86 genes, 10.5%	TCC1 CRG1 FTR1 HAP43 RFG1 STE11 SLR1 IRO1 ICL1	Candida albicans
19725	cellular homeostasis	8 out of 86 genes, 9.3%	DBF2 CFL2 ATX1 CRG1 FTR1 HAP43 CRP1 IRO1	Candida albicans
7010	cytoskeleton organization	7 out of 86 genes, 8.1%	DBF2 KIP1 NUF2 MIF2 C3_07110W_A CR_09520C_A C1_07360W_A	Candida albicans
5975	carbohydrate metabolic process	6 out of 86 genes, 7%	MNN42 PGA4 MNN41 PCK1 SGA1 ICL1	Candida albicans
6629	lipid metabolic process	6 out of 86 genes, 7%	C2_00740C_A LIP4 SFC1 SUR2 FEN1 ICL1	Candida albicans
42493	response to drug	6 out of 86 genes, 7%	SFC1 PGA4 TNA1 ROA1 FET31 QDR3	Candida albicans
30448	hyphal growth	4 out of 86 genes, 4.7%	DBF2 HIR1 STE11 SLR1	Candida albicans
6464	cellular protein modification process	4 out of 86 genes, 4.7%	DBF2 MNN41 STE11 PTP2	Candida albicans
71555	cell wall organization	3 out of 86 genes, 3.5%	PGA4 MHP1 QDR3	Candida albicans
48468	cell development	3 out of 86 genes, 3.5%	PGA4 STE11 QDR3	Candida albicans
16070	RNA metabolic process	3 out of 86 genes, 3.5%	HIR1 CR_03190C_A ILS1	Candida albicans
7165	signal transduction	3 out of 86 genes, 3.5%	DBF2 LTE1 STE11	Candida albicans
70783	growth of unicellular organism as a thread of attached cells	3 out of 86 genes, 3.5%	WOR2 STE11 WHI3	Candida albicans
7124	pseudohyphal growth	2 out of 86 genes, 2.3%	STE11 WHI3	Candida albicans
6259	DNA metabolic process	2 out of 86 genes, 2.3%	C1_07980C_A POL93	Candida albicans
16192	vesicle-mediated transport	2 out of 86 genes, 2.3%	FEN1 LTE1	Candida albicans
910	cytokinesis	1 out of 86 genes, 1.2%	DBF2	Candida albicans
6091	generation of precursor metabolites and energy	1 out of 86 genes, 1.2%	SGA1	Candida albicans
7155	cell adhesion	1 out of 86 genes, 1.2%	AAF1	Candida albicans
746	conjugation	1 out of 86 genes, 1.2%	STE11	Candida albicans
42710	biofilm formation	1 out of 86 genes, 1.2%	QDR3	Candida albicans
30163	protein catabolic process	1 out of 86 genes, 1.2%	PRB1	Candida albicans
6412	translation	1 out of 86 genes, 1.2%	ILS1	Candida albicans
42254	ribosome biogenesis	0 out of 86 genes, 0%	none
45333	cellular respiration	0 out of 86 genes, 0%	none
32196	transposition	0 out of 86 genes, 0%	none
6457	protein folding	0 out of 86 genes, 0%	none
7114	cell budding	0 out of 86 genes, 0%	none
6766	vitamin metabolic process	0 out of 86 genes, 0%	none
6997	nucleus organization	0 out of 86 genes, 0%	none
other	other	6 out of 86 genes, 7%	ATO5 C2_07430C_A C2_07240C_A C4_02520C_A C4_02230C_A CR_07940W_A	Candida albicans
The genes downregulated (-1.5 cut off) were categorized using the Process Ontology in the CGD Gene Ontology Slim Mapper

## Sheet: Metabolism genes
			ILS1 biofilm vs WT biofilm
	ORF	Feature	baseMean	log2FoldChange	lfcSE	stat	pvalue	padj
Glycerol metabolism
DAK2	orf19.4777	C1_09190C_A	277.35	0.693055	0.238907	2.90094	0.00372041	0.0124959
GCY1	orf19.6757	C3_07340W_A	29.6308	1.53916	0.692042	2.22408	0.0261429	0.182123
RHR2	orf19.5437	C3_00320W_A	814.2	1.08326	0.163588	6.6219	3.54617e-11	1.09271e-09
GPD1	orf19.1756	C2_10240W_A	321.297	-1.49096	0.229911	-6.48496	8.87547e-11	2.16958e-09
GPD2	orf19.691	C6_02010C_A	783.624	1.17578	0.164112	7.16448	7.808e-13	2.86959e-11
HGT10	orf19.5753	C6_03790C_A	35.0371	2.37067	0.737729	3.21347	0.00131141	0.0166605
GUT1	orf19.558	CR_05220C_A	213.816	0.695276	0.268551	2.58899	0.00962573	0.0272029
GUT2	orf19.3133	C4_06760W_A	193.512	0.441228	0.292307	1.50947	0.13118	0.296496
Glycolysis
HXK1	orf19.2154	C6_04580W_A	337.517	-0.560502	0.231936	-2.41662	0.0156652	0.0680328
PYC2	orf19.789	C4_03940C_A	1409.4	0.209107	0.151099	1.3839	0.166388	0.391281
PGI1	orf19.3888	CR_06340C_A	470.331	0.35183	0.232508	1.51319	0.13023	0.325323
TDH3	orf19.6814	C3_06870W_A	3865.92	0.0961591	0.148105	0.649264	0.516168	0.795034
PGK1	orf19.3651	C6_00750C_A	1630.41	-0.0403128	0.172263	-0.234019	0.814971	1
PFK2	orf19.6540	C7_01800C_A	794.041	-0.697912	0.171045	-4.08029	4.49791e-05	0.000391738
PFK1	orf19.3967	C5_04810W_A	1534.84	-0.886784	0.161045	-5.50642	3.66208e-08	7.2548e-07
GPM1	orf19.903	C2_03270W_A	1000.91	-0.575544	0.165174	-3.48447	0.000493108	0.00324273
ENO1	orf19.395	C1_08500C_A	2796.07	-0.128753	0.12983	-0.991699	0.321345	0.526184
CDC19	orf19.3575	C2_05460W_A	1156.77	-0.668197	0.201407	-3.31765	0.000907774	0.00646254
TPI1	orf19.6745	C3_07440W_A	1236.03	-0.619093	0.145662	-4.25021	2.13566e-05	0.000208866
GSY1	orf19.3278	CR_00780C_A	846.362	-0.508212	0.165962	-3.06222	0.00219701	0.0121152
GLK1	orf19.734	CR_07150W_A	313.774	-0.264107	0.228139	-1.15766	0.247004	0.508668
TPS1	orf19.6640	CR_05720W_A	339.727	-0.123056	0.240781	-0.511069	0.609303	0.869284
GPM2	orf19.1067	C1_04320W_A	55.5775	-1.26352	0.497735	-2.53854	0.0111315	0.0453845
GLG2	orf19.7434	C3_06450W_A	53.0404	0.108909	0.492211	0.221266	0.824885	0.930233
PCK1	orf19.7514	CR_00200W_A	1389.83	-1.60169	0.140066	-11.4353	2.7869e-30	5.95921e-28
Galactose metabolism
GAL7	orf19.3675	C1_02180W_A	111.586	-0.462112	0.359095	-1.28688	0.198135	0.39458
GAL1	orf19.3670	C1_02130C_A	259.022	1.26432	0.24111	5.24374	1.57352e-07	1.51602e-06
GAL10	orf19.3672	C1_02150W_A	307.198	0.206097	0.22674	0.908957	0.363373	0.568903
Ergosterol synthesis
ERG20	orf19.4491	C2_04580W_A	238.392	-0.155823	0.255181	-0.610637	0.54144	0.691067
ERG10	orf19.1591	C2_04310W_A	1236.03	-0.483094	0.142628	-3.38708	0.000706407	0.0045984
ERG12	orf19.4809	C1_09460W_A	212.152	0.541042	0.262421	2.06174	0.039233	0.110948
ERG25	orf19.3732	CR_02370W_A	123.279	-0.0807363	0.32926	-0.245206	0.806297	0.711562
ERG1	orf19.406	C1_08590C_A	258.921	-0.358595	0.24742	-1.44934	0.147243	0.227774
ERG251	orf19.4631	C4_01530C_A	31.1209	-1.68533	0.680539	-2.47647	0.0132689	0.110376
ERG11	orf19.922	C5_00660C_A	408.628	-0.173633	0.225176	-0.771097	0.440649	0.661621
ERG13	orf19.7312	CR_09160C_A	1213.19	-0.646776	0.152934	-4.22911	2.34621e-05	0.000261574
ERG6	orf19.1631	C3_02150C_A	203.124	0.535127	0.263702	2.02929	0.0424288	0.089144
ERG2	orf19.6026	C1_00800C_A	29.6678	1.03848	0.670763	1.54821	0.121571	0.348215
ERG5	orf19.5178	C7_02840C_A	368.762	-0.231624	0.223294	-1.0373	0.299595	0.576252
ERG27	orf19.3240	CR_01140C_A	47.2353	0.570472	0.561586	1.01582	0.309714	0.447662
ERG24	orf19.1598	C2_09400C_A	56.9783	0.933144	0.50009	1.86595	0.0620481	0.164545
ERG9	orf19.3616	C2_08610W_A	132.235	0.798454	0.32066	2.49003	0.0127732	0.0507289
ERG26	orf19.2909	C4_06270C_A	49.6626	0.345787	0.516026	0.670095	0.502797	0.685373
ERG7	orf19.1570	C2_02460W_A	172.365	-0.311346	0.321926	-0.967135	0.333477	0.556127
ERG4	orf19.5379	C3_00760W_A	57.0425	0.271141	0.481125	0.563557	0.573056	0.757782
ERG3	orf19.767	C1_04770C_A	61.1528	-0.947589	0.492181	-1.92529	0.0541936	0.148779
ERG8	orf19.4606	C4_01870C_A	127.627	0.728493	0.327285	2.22587	0.0260232	0.0801545
TCA cycle
MDH1	orf19.7481	CR_00540C_A	448.262	-0.587816	0.191649	-3.06716	0.00216105	0.0133297
SDH2	orf19.637	CR_05180C_A	751.564	-1.15443	0.197084	-5.85753	4.69813e-09	1.0558e-07
FUM12	orf19.6724	C3_07640C_A	536.659	-0.15886	0.191666	-0.828836	0.407197	0.631176
LSC1	orf19.3358	C1_01690C_A	212.967	0.789471	0.290273	2.71975	0.00653307	0.0263392
KGD2	orf19.6126	CR_07420W_A	586.987	0.110374	0.178825	0.617221	0.537089	0.805848
ACO1	orf19.6385	CR_08210C_A	4821.94	-0.00484459	0.111311	-0.0435229	0.965285	1
IDH2	orf19.5791	C2_03080W_A	823.215	0.173463	0.169132	1.02561	0.305077	0.581779
IDH1	orf19.4826	C1_09630W_A	836.06	0.438945	0.163679	2.68174	0.00732411	0.0363955
KGD1	orf19.6165	C3_00880W_A	1147.28	-0.0202837	0.149528	-0.135651	0.892097	1
CIT1	orf19.4393	CR_03500W_A	3329.13	-0.562285	0.118514	-4.74446	2.09061e-06	2.56393e-05
IDP2	orf19.3733	CR_02360W_A	694.951	0.0336287	0.174544	0.192666	0.84722	0.93919
MLS1	orf19.4833	C1_09690W_A	4512.45	-0.955571	0.149288	-6.40086	1.54503e-10	3.75958e-09
Fermentation
ALD4	orf19.6306	CR_04870C_A	389.296	-0.202553	0.207752	-0.974976	0.329572	0.551415
PDC11	orf19.2877	C4_06570C_A	NOT FOUND
ADH1	orf19.3997	C5_05050W_A	4071.93	-0.632328	0.133702	-4.72937	2.25217e-06	3.11901e-05
ADH2	orf19.5113	C1_08330C_A	3262.97	0.105253	0.132245	0.79589	0.426096	0.716273
ADH5	orf19.2608	CR_02070C_A	727.521	-0.496302	0.174777	-2.83963	0.00451662	0.0249081
PDC12	orf19.4608	C4_01850C_A	46.8569	0.478273	0.518931	0.92165	0.356711	0.581125
ALD5	orf19.5806	C2_02970C_A	11222.9	-0.337974	0.109439	-3.08823	0.0020135	0.0108065
ADH3	orf19.4505	C2_04470W_A	59.097	-0.666984	0.564566	-1.18141	0.23744	0.386262
ADH4	orf19.271	C3_02800W_A	2.72818	2.26538	2.18505	1.03676	0.299847	0.632302
ALD6	orf19.742	C4_05130C_A	8179.03	0.19769	0.126152	1.56708	0.117096	0.302709
Electron transport chain
COX13	orf19.1467	C2_01590W_A	376.372	0.487824	0.22861	2.13387	0.0328536	0.103324
	orf19.2821	CR_02620C_A	139.688	-0.00251051	0.316588	-0.0079299	0.993673	0.799004
CYT1	orf19.3527	C2_04950C_A	614.185	0.957368	0.185003	5.17489	2.28049e-07	3.36153e-06
QCR2	orf19.2644	C5_03350W_A	568.612	0.715295	0.198734	3.59925	0.000319131	0.00262207
RIP1	orf19.5893	C3_04430W_A	679.654	0.336799	0.165472	2.03539	0.0418121	0.144064
	orf19.4016	C5_05230C_A	856.848	0.759553	0.157801	4.81337	1.48408e-06	2.15169e-05
	orf19.913	C3_04080W_A	NOT FOUND
Fatty acid metabolism
POX1	orf19.5723	C6_03560W_A	NOT FOUND
OLE1	orf19.5117	C1_08360C_A	8179.22	-0.341473	0.11568	-2.95187	0.00315858	0.0156259
LIP3	orf19.4856	C1_09900W_A	0.960181	-3.319	4.17782	-0.794433	0.426943	0.649955
ACC1	orf19.7466	CR_00640W_A	11047.1	-0.0332668	0.114877	-0.289586	0.772133	0.890315
FAS1	orf19.979	C5_00190C_A	6381.71	0.661043	0.107895	6.1267	8.9719e-10	2.20202e-08
FAS2	orf19.5949	C3_04830C_A	9064.38	0.658064	0.113291	5.80863	6.29871e-09	1.37179e-07
CAT2	orf19.4591	C4_02020W_A	1573.85	-0.184812	0.143664	-1.28642	0.198298	0.435127
ANT1	orf19.6254	C1_06570W_A	434.088	-0.399376	0.208994	-1.91094	0.0560119	0.161935
PXP2	orf19.1655	C3_01930W_A	2154.5	0.173531	0.124921	1.38913	0.164794	0.385515
POT1	orf19.7520	CR_00150C_A	1771.02	-0.605244	0.13698	-4.4185	9.93886e-06	0.000105259
POX1-3	orf19.1652	C3_01960C_A	3587.3	-0.406578	0.127273	-3.19453	0.0014006	0.0093988
PEX5	orf19.5640	C4_00150C_A	572.038	-0.852641	0.176287	-4.83668	1.32028e-06	1.93764e-05
LIP4	orf19.2133	C6_04490W_A	64.001	-3.09032	0.537875	-5.74542	9.16938e-09	1.65947e-07
ECI1	orf19.6445	CR_08690C_A	422.103	0.160092	0.200664	0.797813	0.424979	0.628484
